# Supplementary material for: α-Haloacrylates as acceptors in the [3 + 2] cycloaddition reaction with NaN3: an expedient approach to N-unsubstituted 1,2,3-triazole-4-carboxylates
Source: Royal Society of Chemistry journal article supplement (doi:10.1039/c3ob42276c), 2014-01-01
Supplement: c3ob42276c1.pdf [file c3ob42276c1.pdf]

## Supporting Information

### ***α*-Haloacrylates as acceptors in the [3+2] cycloaddition reaction with NaN<sub>3</sub>: an expedient approach to *N*-unsubstituted 1,2,3-triazole-4-carboxylates**

**John Kallikat Augustine,\* Chandrakantha Boodappa and Srinivasa Venkatachaliah**

*Syngene International Ltd., Biocon Park, Plot Nos. 2 & 3, Bommasandra IV Phase, Jigani Link Road, Bangalore - 560 099, India.*

[john.kallikat@syngeneintl.com](mailto:john.kallikat@syngeneintl.com)

#### Table of contents

|                                                                                     |         |
|-------------------------------------------------------------------------------------|---------|
| Table of contents.....                                                              | 1       |
| <sup>1</sup> H NMR, <sup>13</sup> C NMR, HPLC and IR reports for <b>2a-2p</b> ..... | 2-65    |
| <sup>1</sup> H NMR, <sup>13</sup> C NMR, HPLC and IR reports for <b>2q-2t</b> ..... | 66-81   |
| <sup>1</sup> H NMR, <sup>13</sup> C NMR, HPLC and IR reports for <b>1e</b> .....    | 82-85   |
| <sup>1</sup> H NMR, <sup>13</sup> C NMR, HPLC and IR reports for <b>1k-1l</b> ..... | 86-93   |
| <sup>1</sup> H NMR, <sup>13</sup> C NMR, HPLC and IR reports for <b>1u-1x</b> ..... | 94-109  |
| <sup>1</sup> H NMR, <sup>13</sup> C NMR, HPLC and IR reports for <b>3a</b> .....    | 110-113 |
| <sup>1</sup> H NMR, LCMS and NOESY reports for <b>6a</b> .....                      | 114-116 |
| <sup>1</sup> H NMR, LCMS and NOESY reports for <b>6b</b> .....                      | 117-119 |
| <sup>1</sup> H NMR, <sup>13</sup> C NMR, HPLC and IR reports for <b>7</b> .....     | 120-123 |

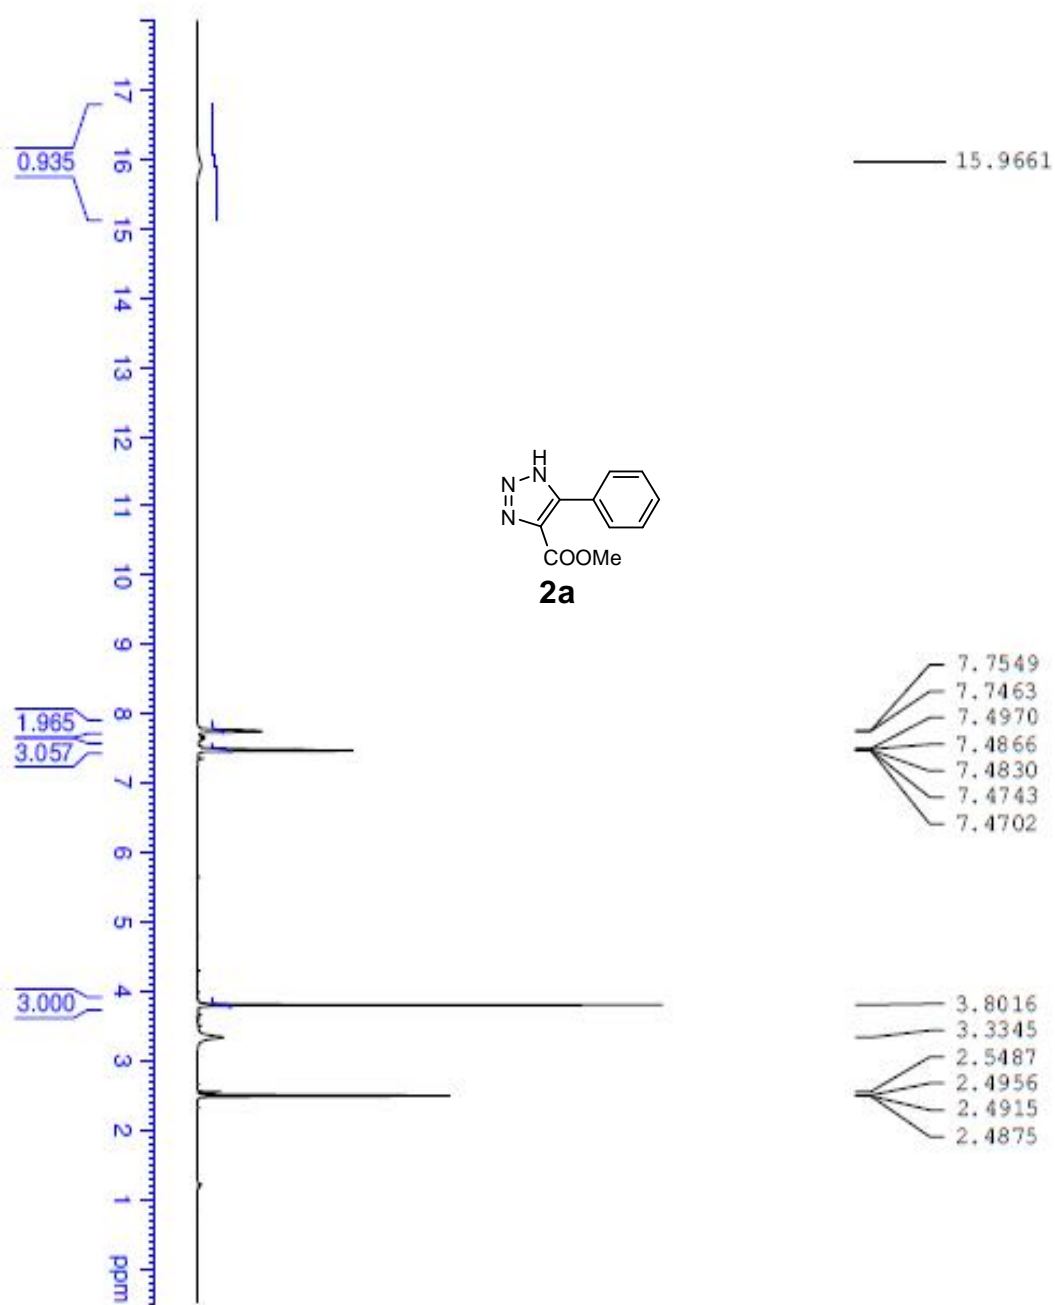

<sup>1</sup>H NMR (400 MHz) in DMSO-*d*<sub>6</sub> (**2a**)

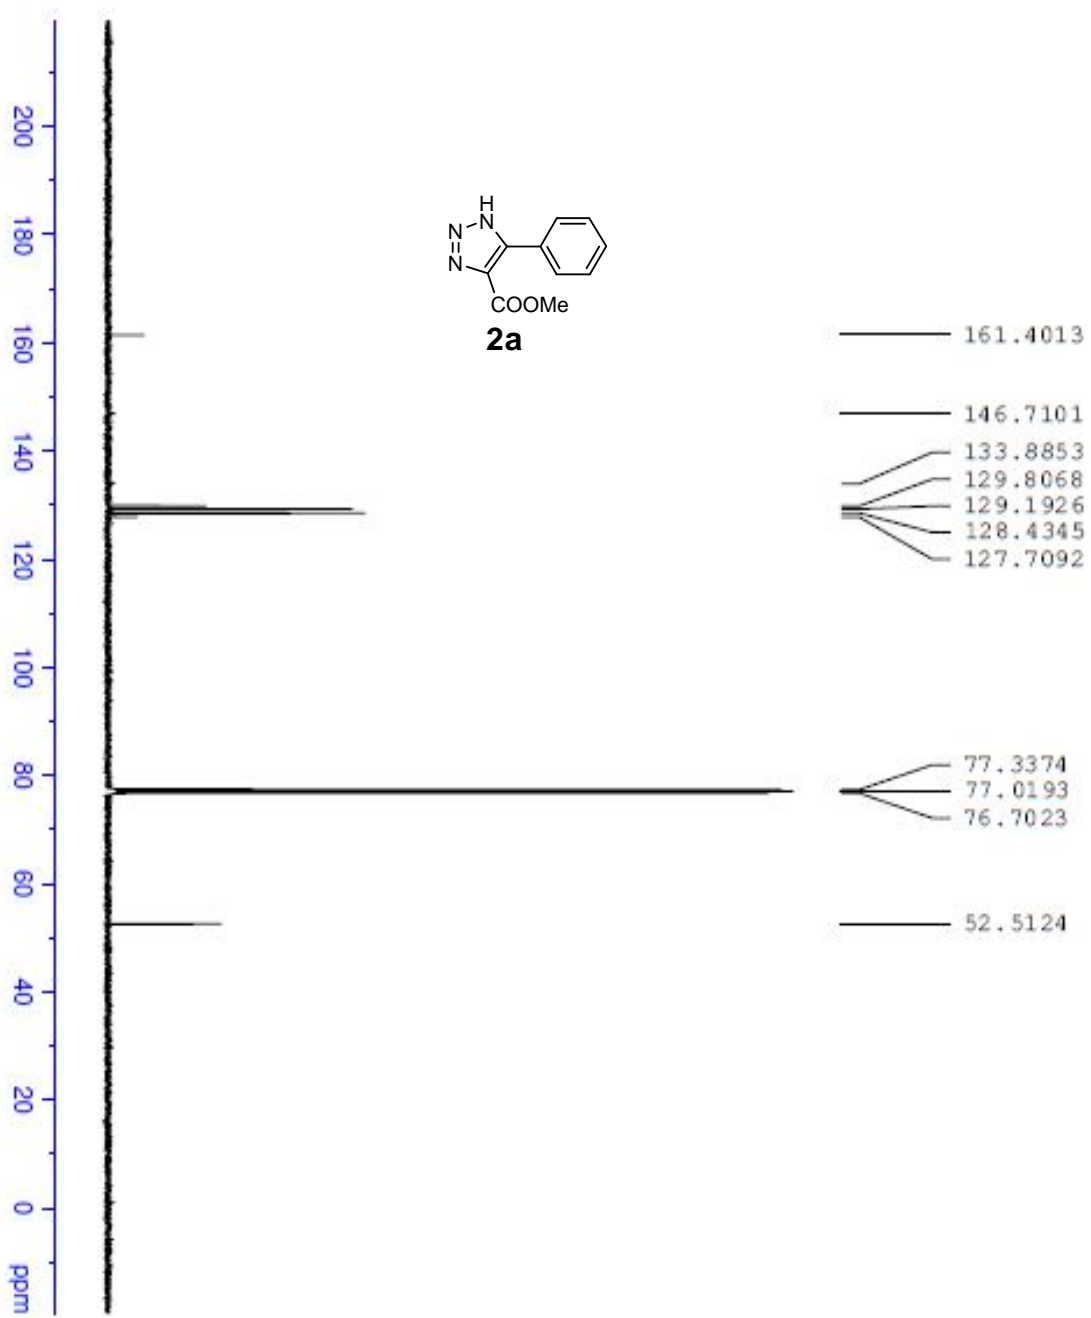

$^{13}\text{C}$  NMR (100 MHz) in  $\text{CDCl}_3$  (**2a**)

Method info : A: 0.1% TFA IN H2O , B:0.1% TFA IN ACN ; Flow Rate:2.0 ml/min  
COLUMN:XBridge C8 (50x4.6mm, 3.5µm), +ve mode

| TIME | %B  |
|------|-----|
| 0    | 05  |
| 8.0  | 100 |
| 8.1  | 100 |
| 8.5  | 05  |
| 10   | 05  |

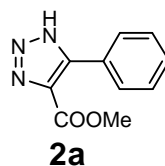

->

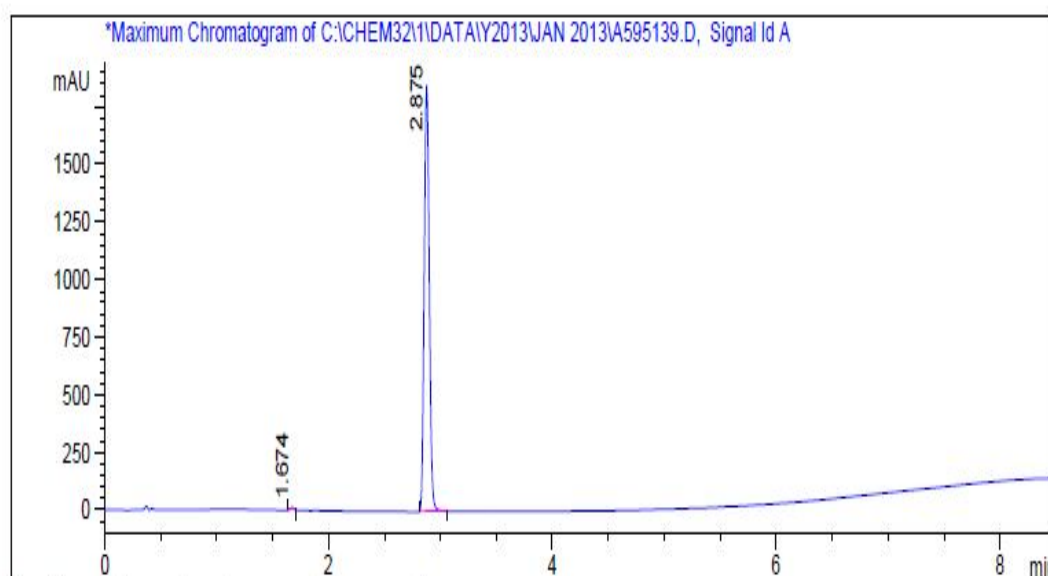

| Peak No | RT min | Area       | Area % |
|---------|--------|------------|--------|
| 1       | 1.674  | 2.589e+001 | 0.440  |
| 2       | 2.875  | 5.853e+003 | 99.560 |

HPLC (2a)

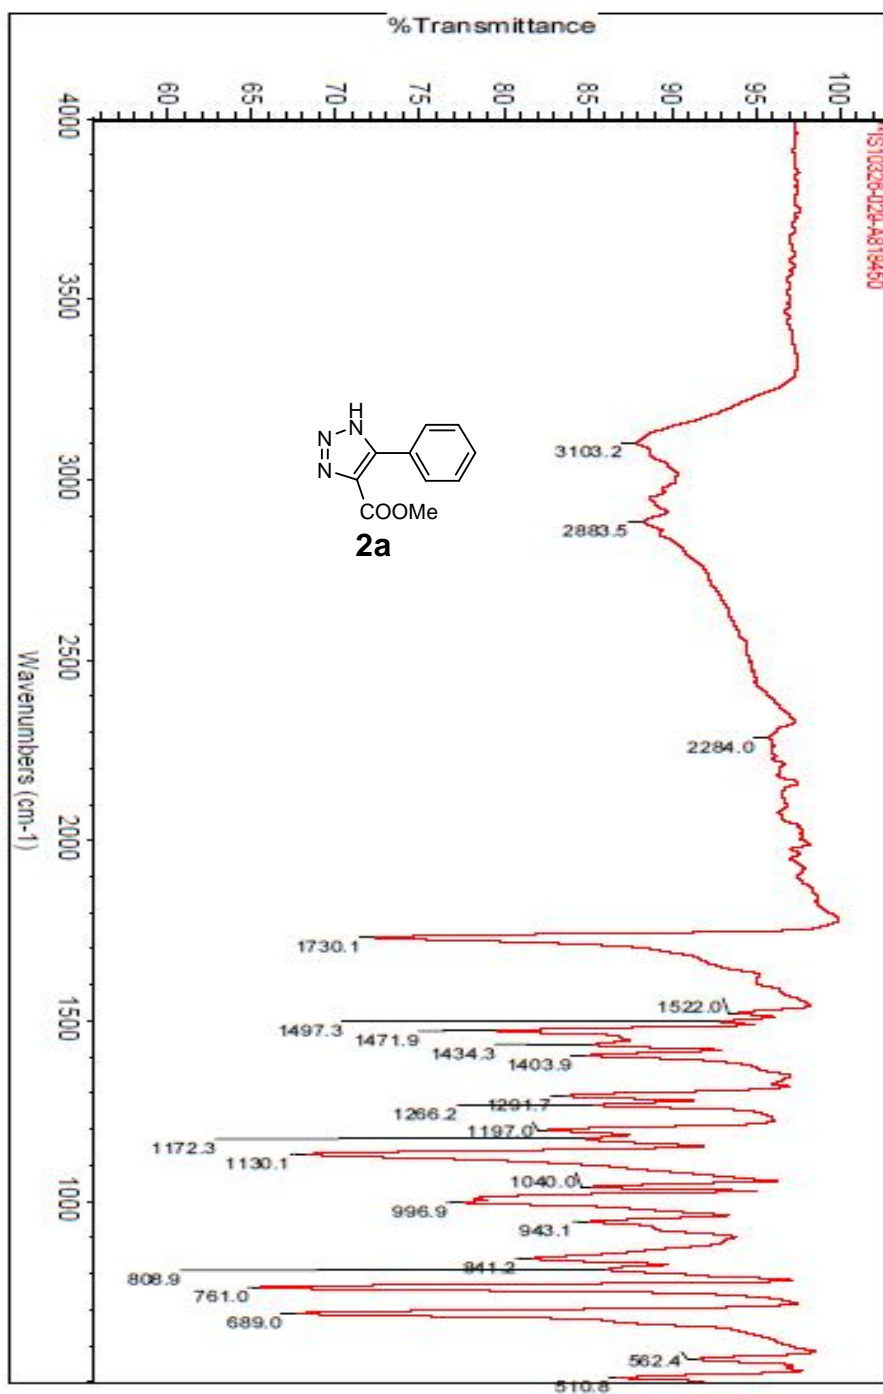

IR (**2a**)

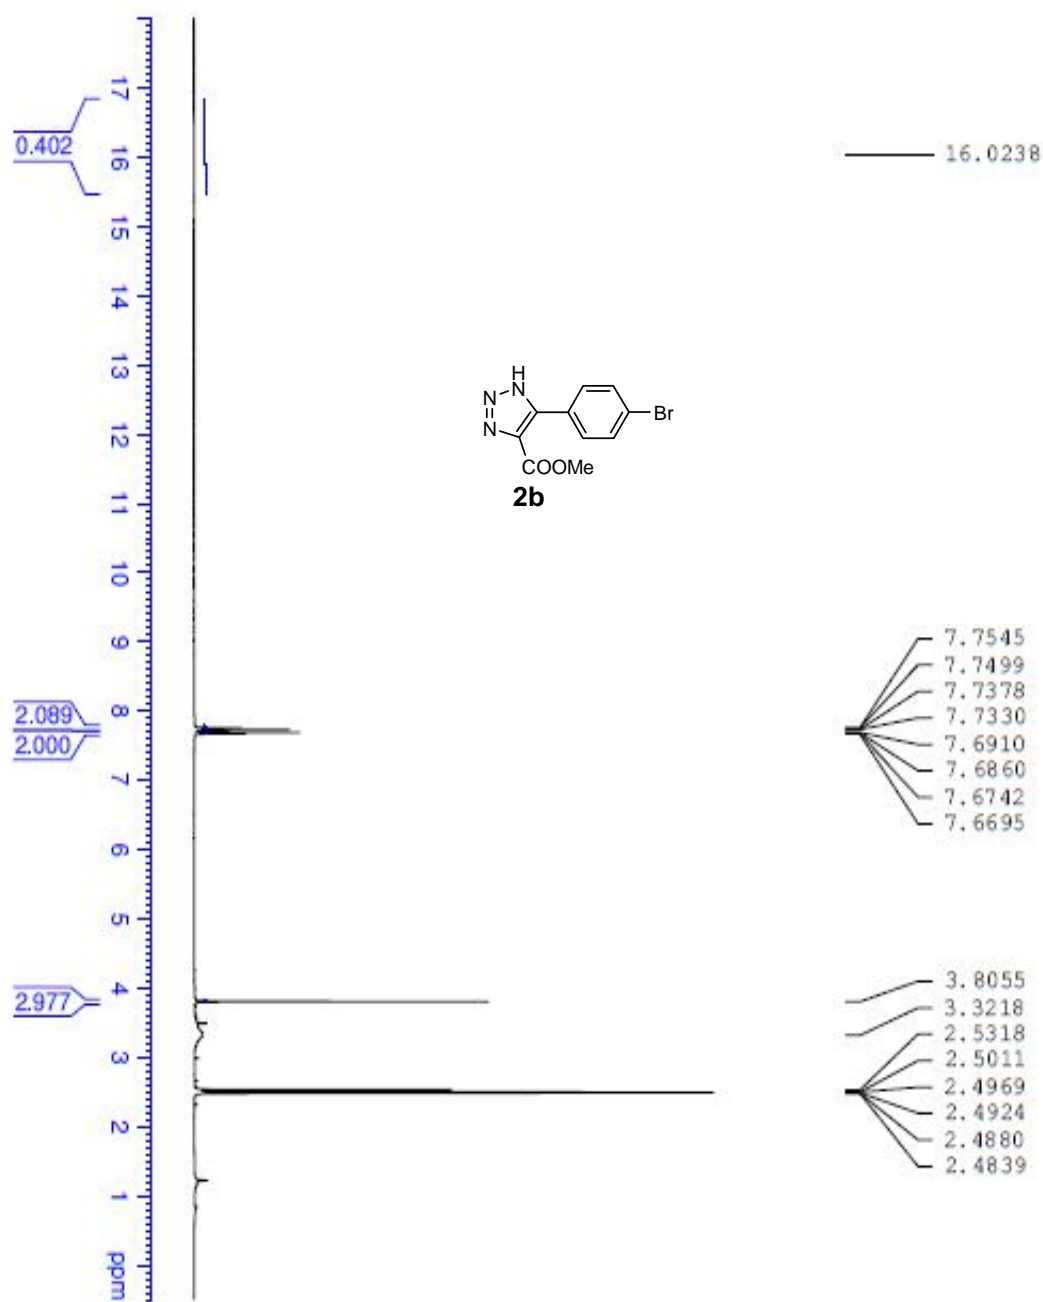

$^1\text{H NMR}$  (400 MHz) in  $\text{DMSO-}d_6$  (**2b**)

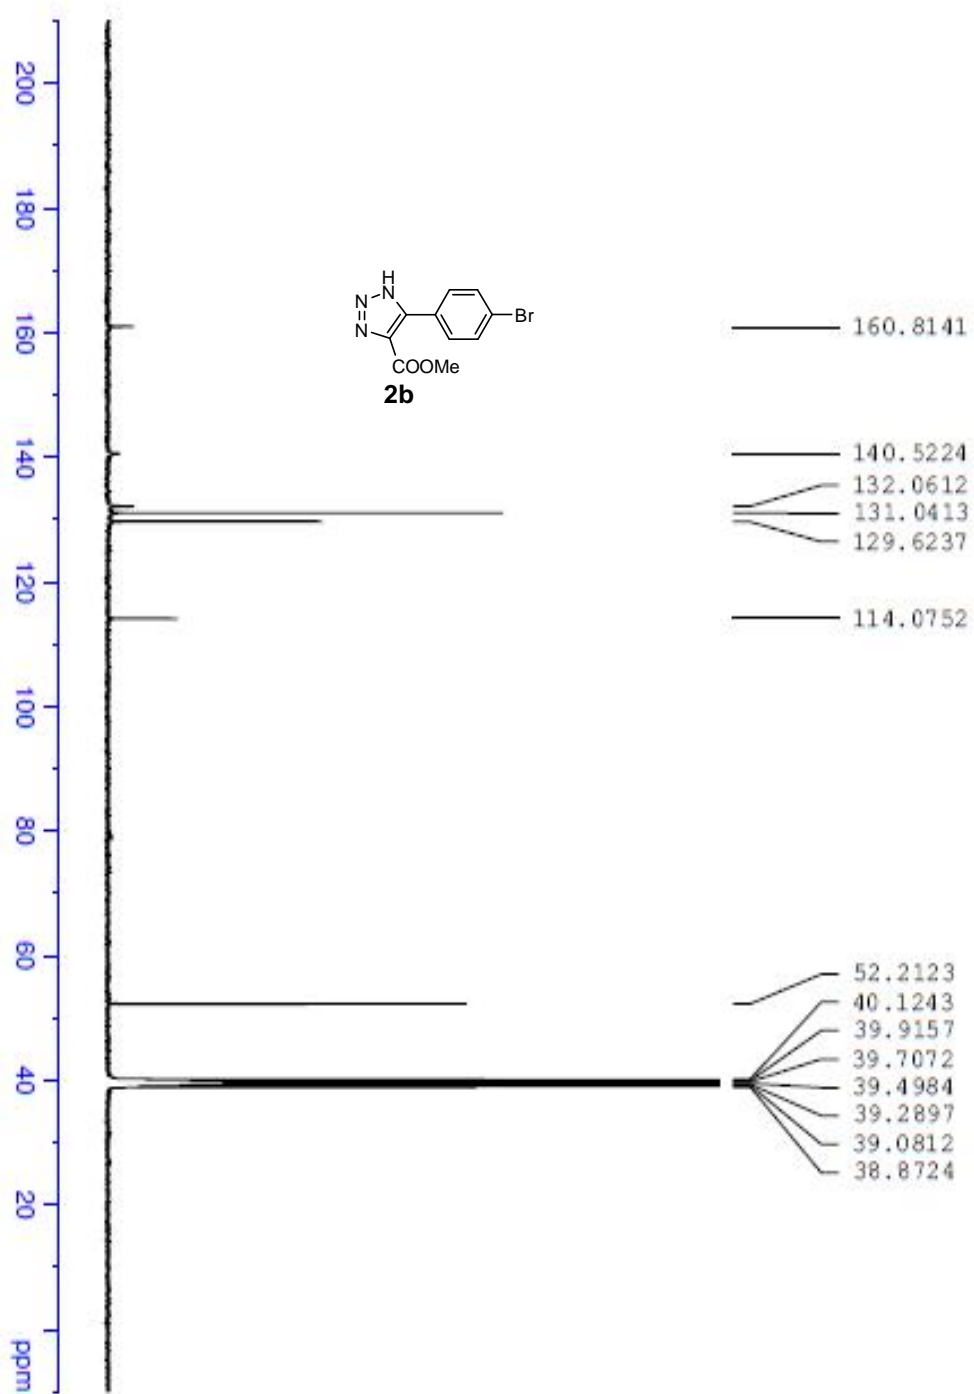

(100 MHz) in DMSO-d<sub>6</sub> (**2b**)

<sup>13</sup>C NMR

Method info : A : 0.1%TFA IN H2O B: 0.1%TFA IN ACN Flow = 2.0 mL/min  
 COLUMN:XBridge C8 (50X4.6)mm,3.5µm , +ve mode

| Time | % of B |
|------|--------|
| 0    | 5      |
| 8.0  | 100    |
| 8.1  | 100    |
| 8.5  | 5      |
| 10.0 | 5      |

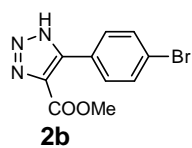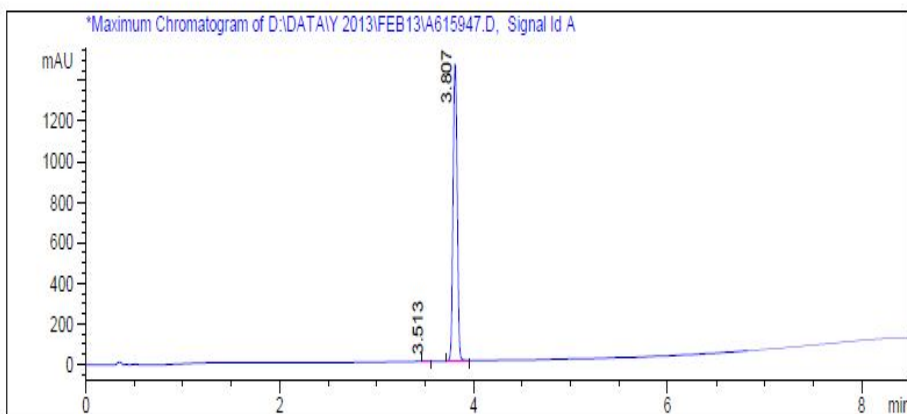

| Peak No | RT min | Area       | Area % |
|---------|--------|------------|--------|
| 1       | 3.513  | 9.212e+000 | 0.209  |
| 2       | 3.807  | 4.395e+003 | 99.791 |

## HPLC (2b)



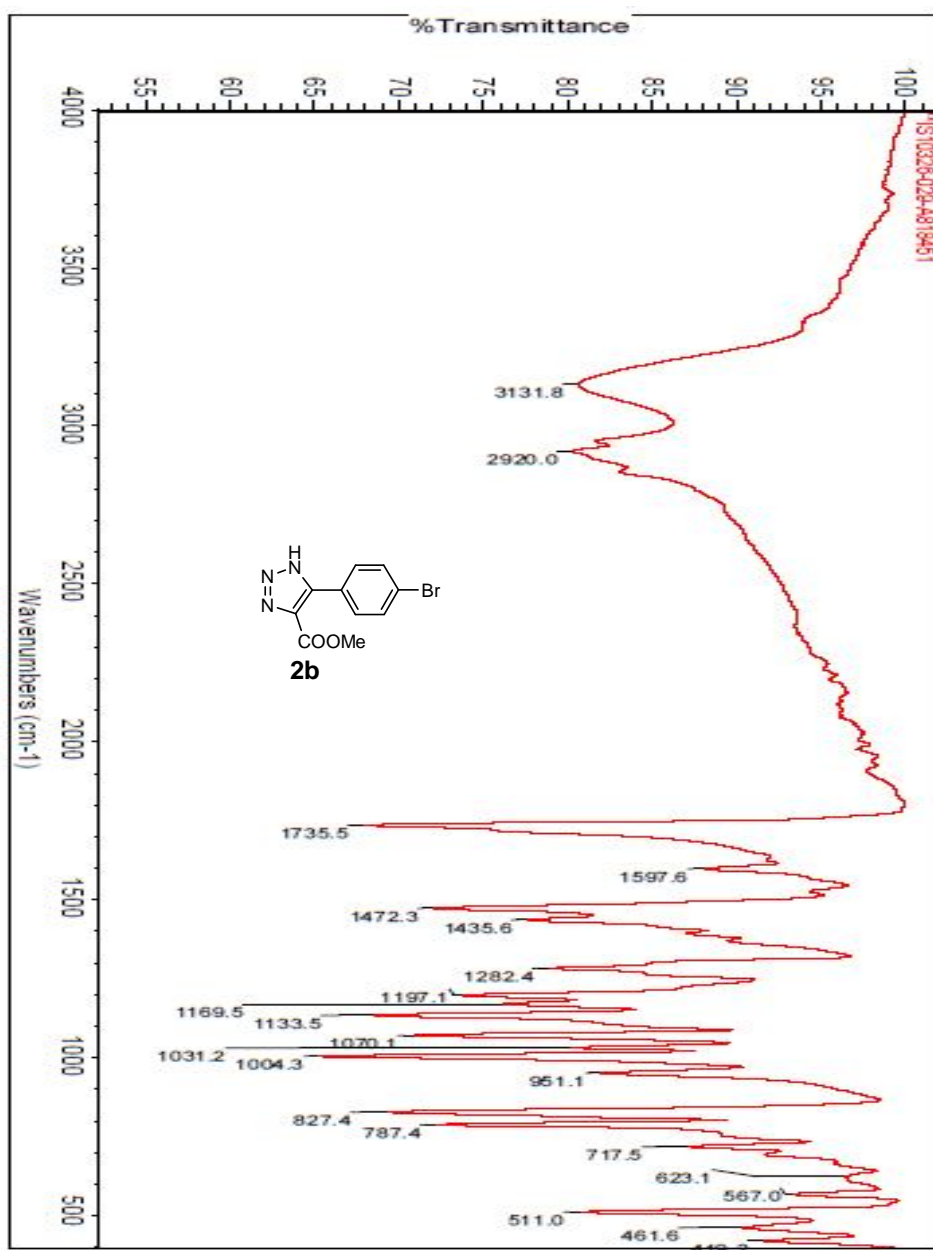

IR (**2b**)

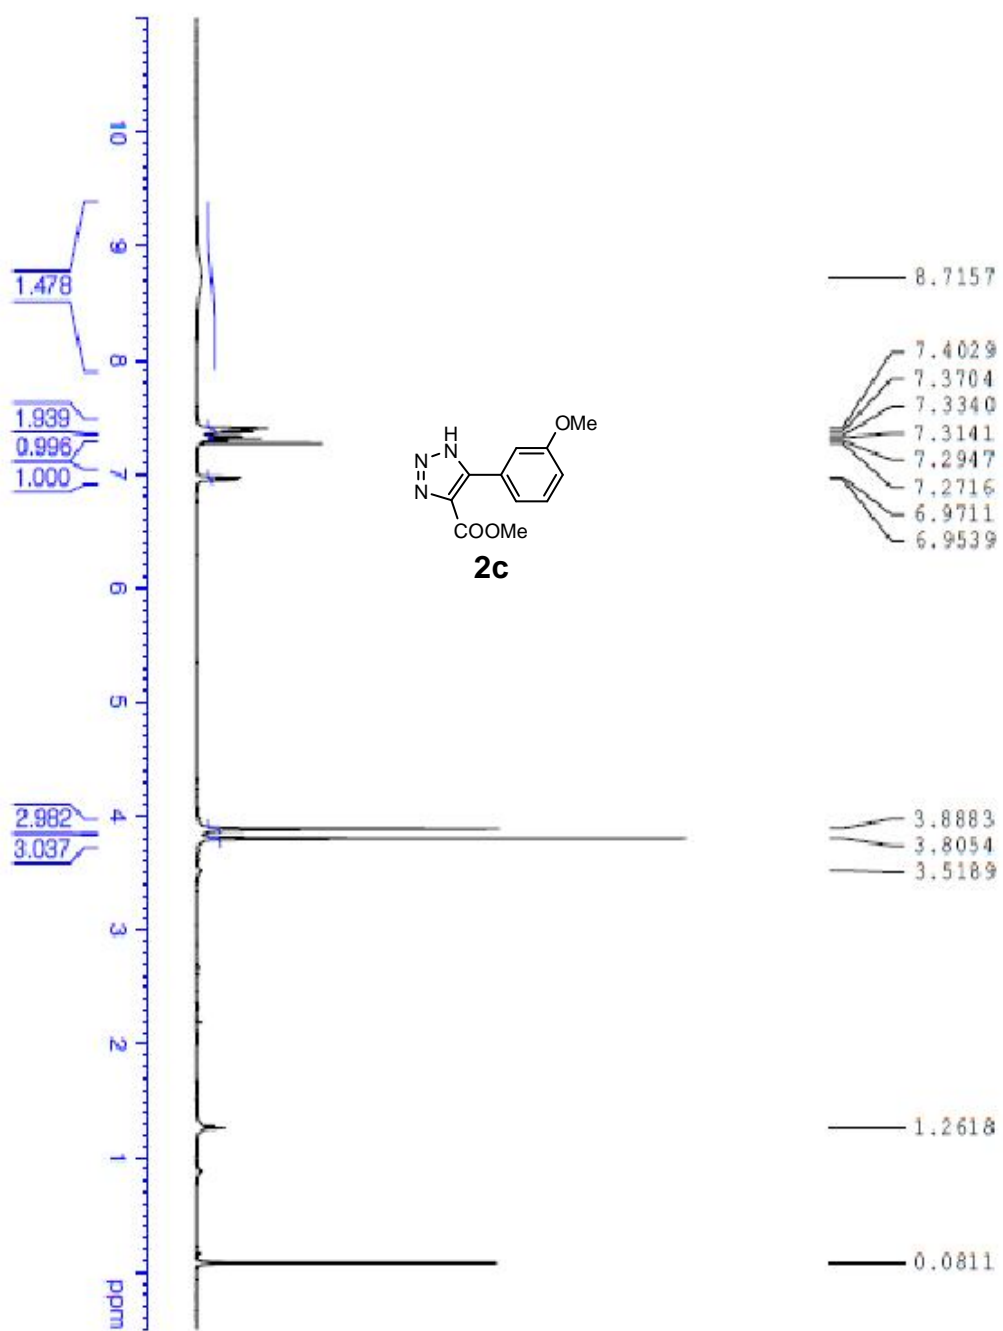

<sup>1</sup>H NMR (400 MHz) in CDCl<sub>3</sub> (2c)

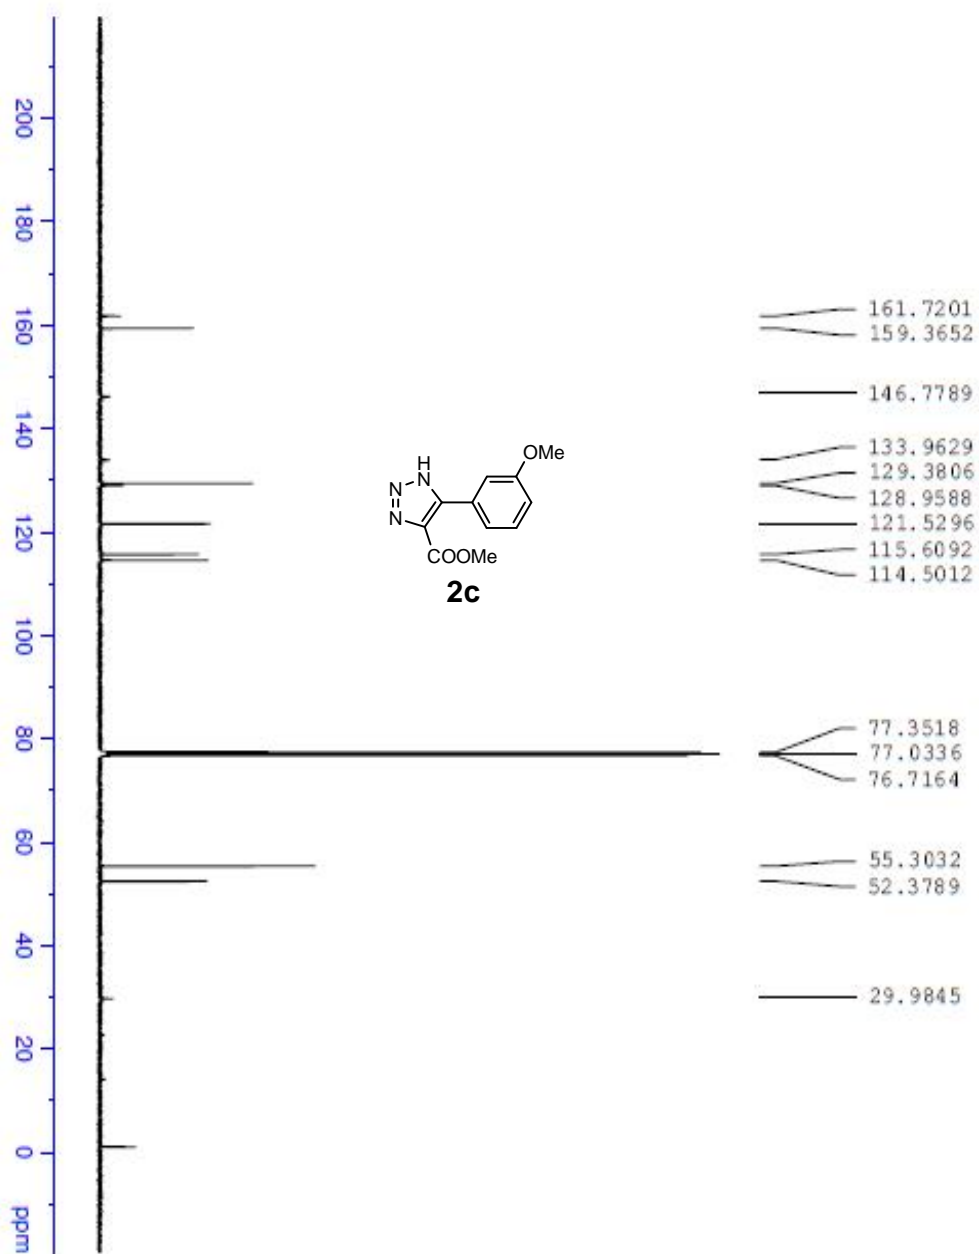

$^{13}\text{C}$  NMR (100 MHz) in  $\text{CDCl}_3$  (**2c**)

Method info : A: 0.1% TFA IN H2O , B:0.1% TFA IN ACN ; Flow Rate:2.0 ml/min  
 COLUMN:XBridge C8 (50x4.6mm, 3.5µm), +ve mode

| TIME | %B  |
|------|-----|
| 0    | 05  |
| 8.0  | 100 |
| 8.1  | 100 |
| 8.5  | 05  |
| 10   | 05  |

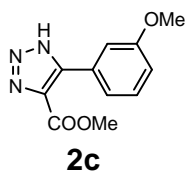

->

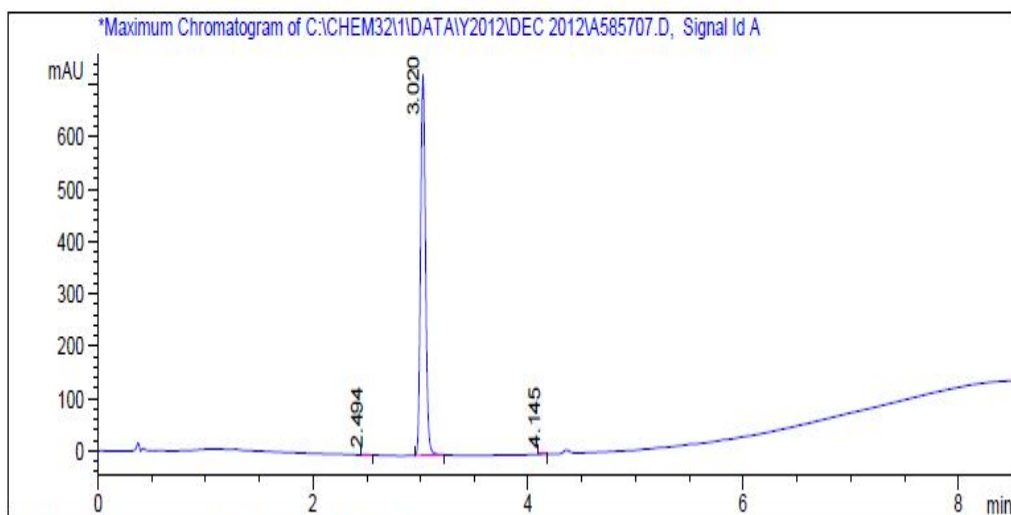

| Peak No | RT min | Area       | Area % |
|---------|--------|------------|--------|
| 1       | 2.494  | 4.465e+000 | 0.190  |
| 2       | 3.020  | 2.340e+003 | 99.746 |
| 3       | 4.145  | 1.500e+000 | 0.064  |

HPLC (2c)

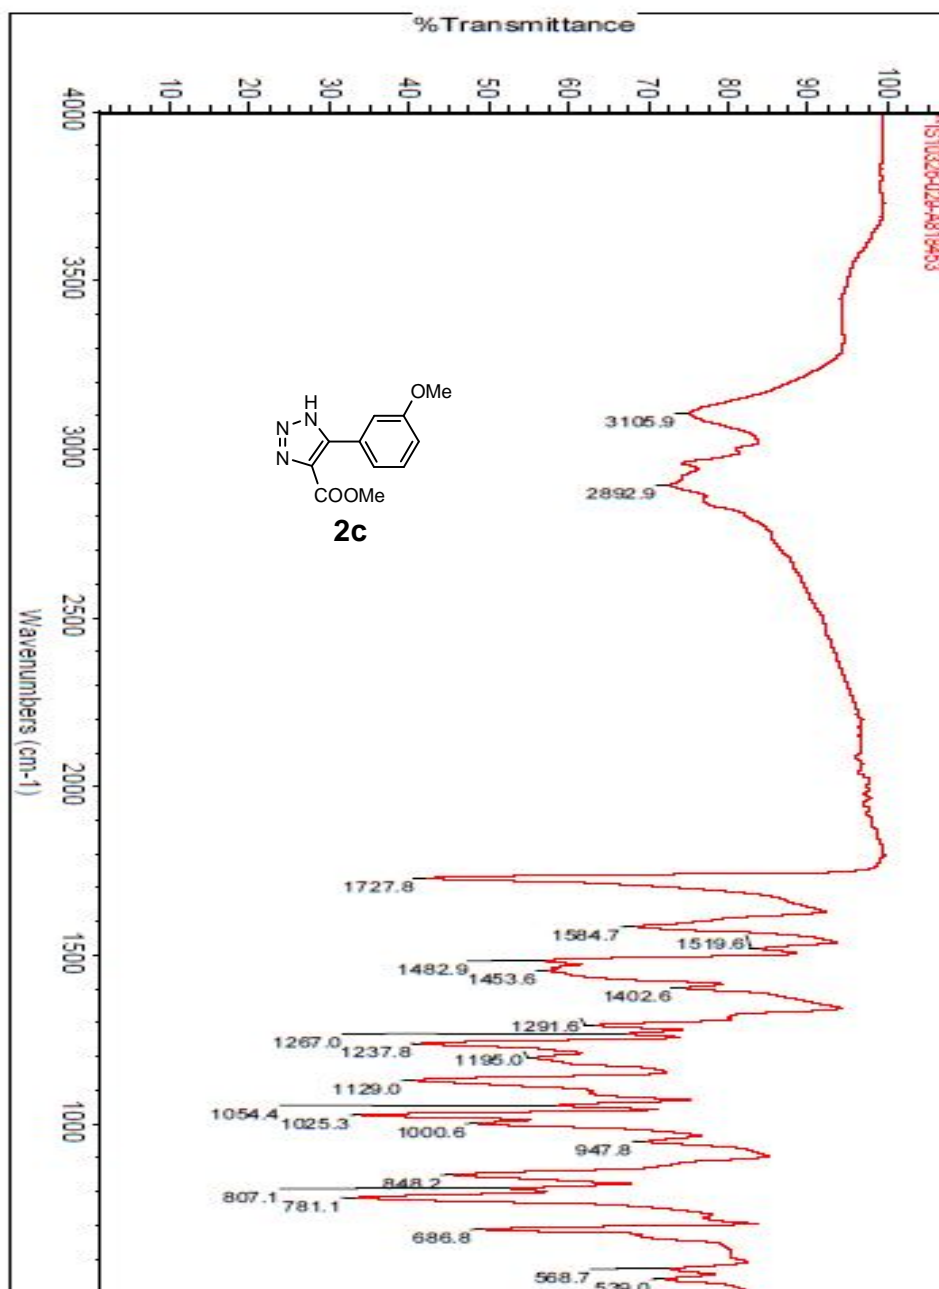

IR (2c)

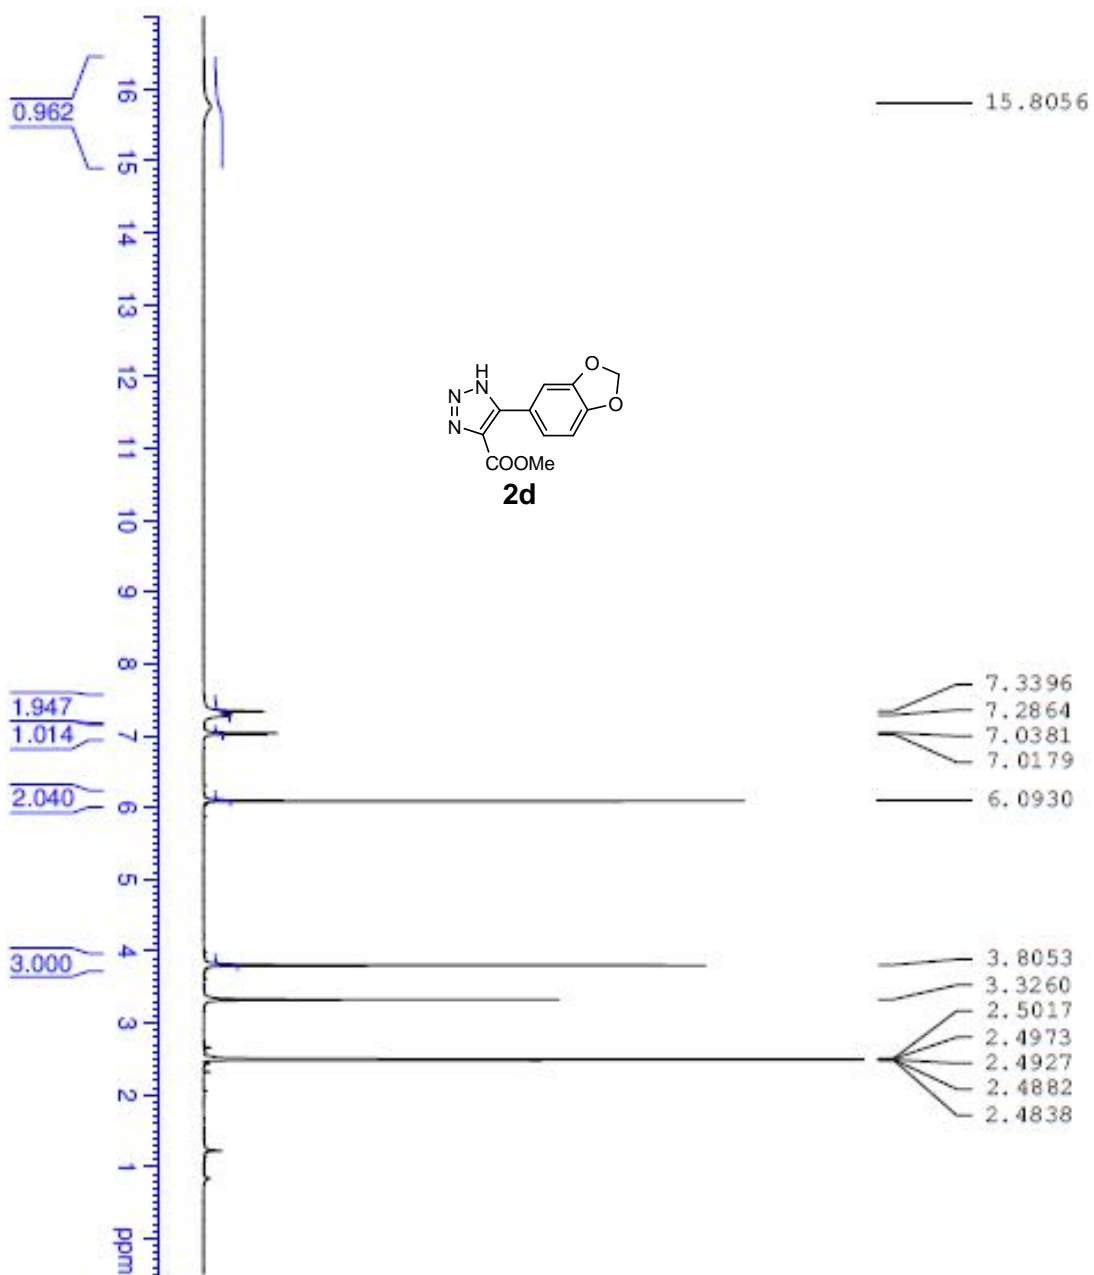

<sup>1</sup>H NMR (400 MHz) in DMSO-*d*<sub>6</sub> (**2d**)

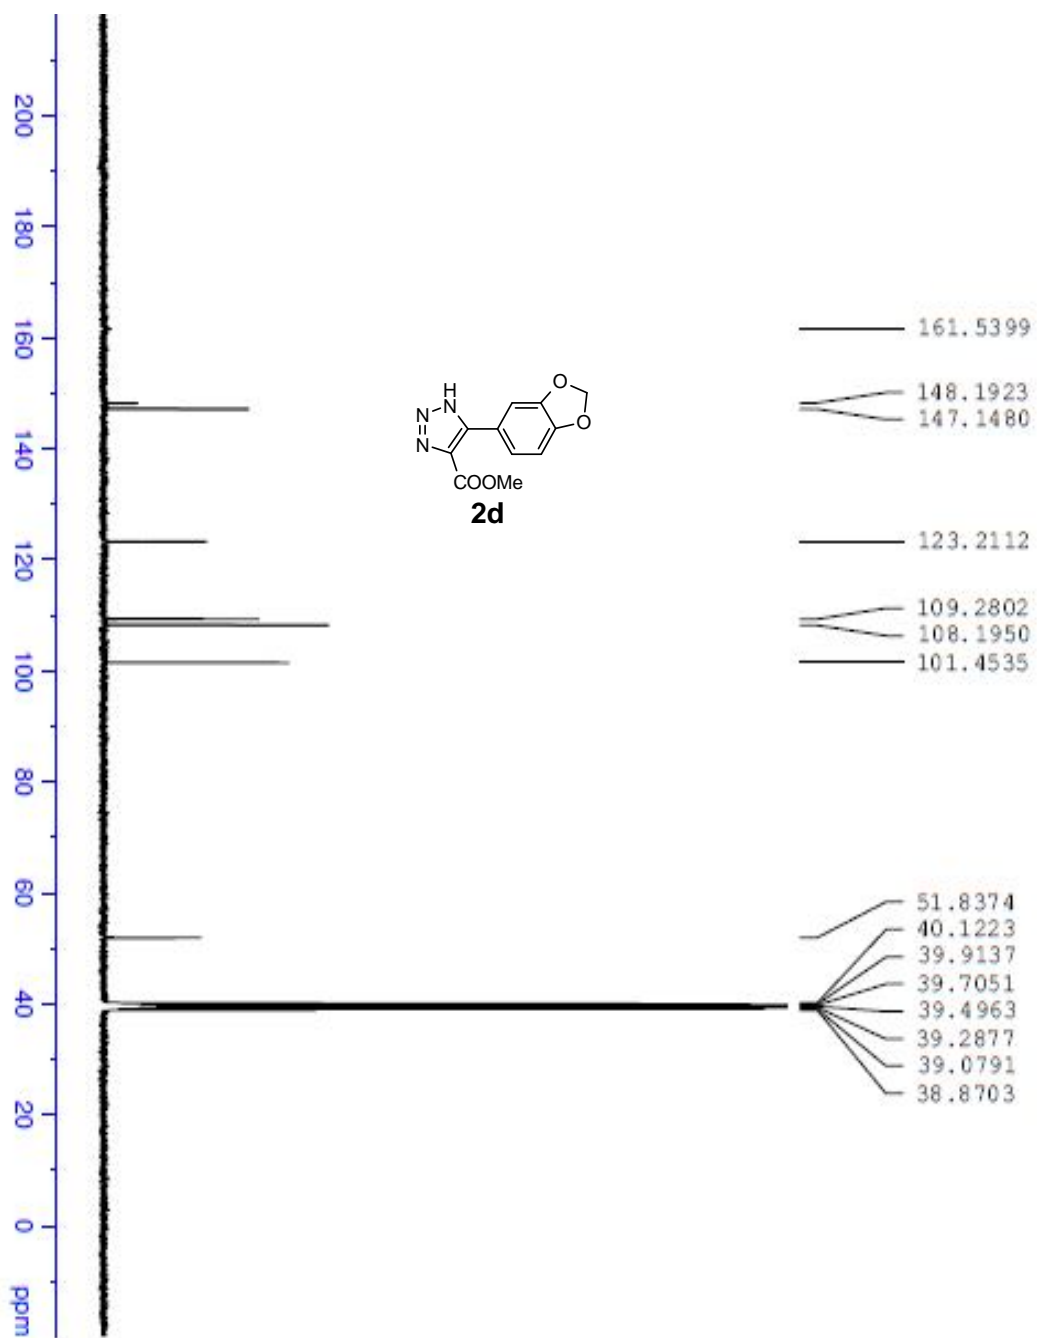

<sup>13</sup>C NMR (100 MHz) in DMSO-*d*<sub>6</sub> (**2d**)

Method info :

A-10mM NH<sub>4</sub>HCO<sub>3</sub> IN H<sub>2</sub>O , B- ACN Flow: 1.0 ml/min  
COLUMN: XBridge C8 (50X4.6mm, 3.5µm), -ve mode

| TIME | %B  |
|------|-----|
| 0    | 05  |
| 8.0  | 100 |
| 8.1  | 100 |
| 8.5  | 05  |
| 10   | 05  |

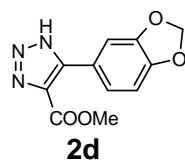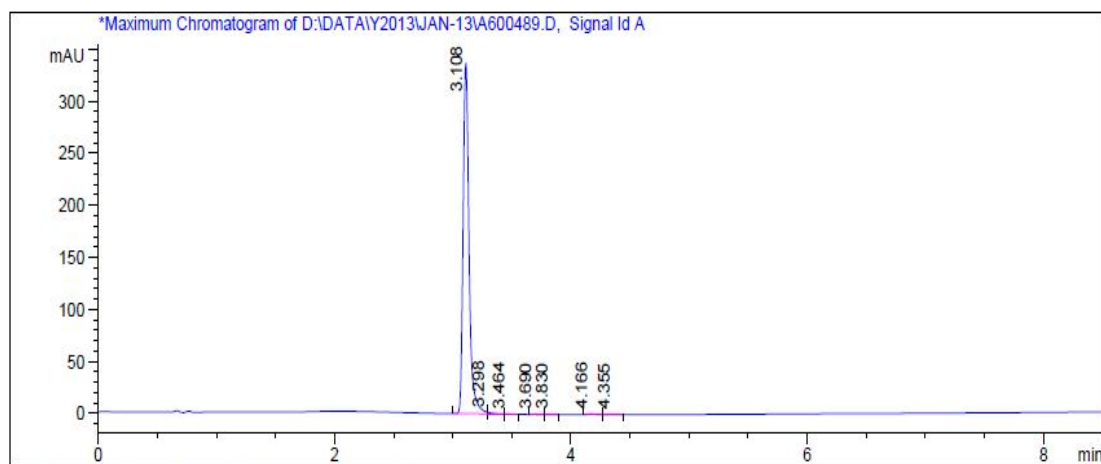

| Peak No | RT min | Area        | Area % |
|---------|--------|-------------|--------|
| 11      | 13.108 | 1.174e+003  | 99.060 |
| 12      | 13.298 | 14.422e+000 | 0.373  |
| 13      | 13.464 | 17.986e-001 | 0.067  |
| 14      | 13.690 | 19.200e-001 | 0.078  |
| 15      | 13.830 | 17.689e-001 | 0.065  |
| 16      | 14.166 | 13.010e+000 | 0.254  |
| 17      | 14.355 | 11.219e+000 | 0.103  |

HPLC (2d)



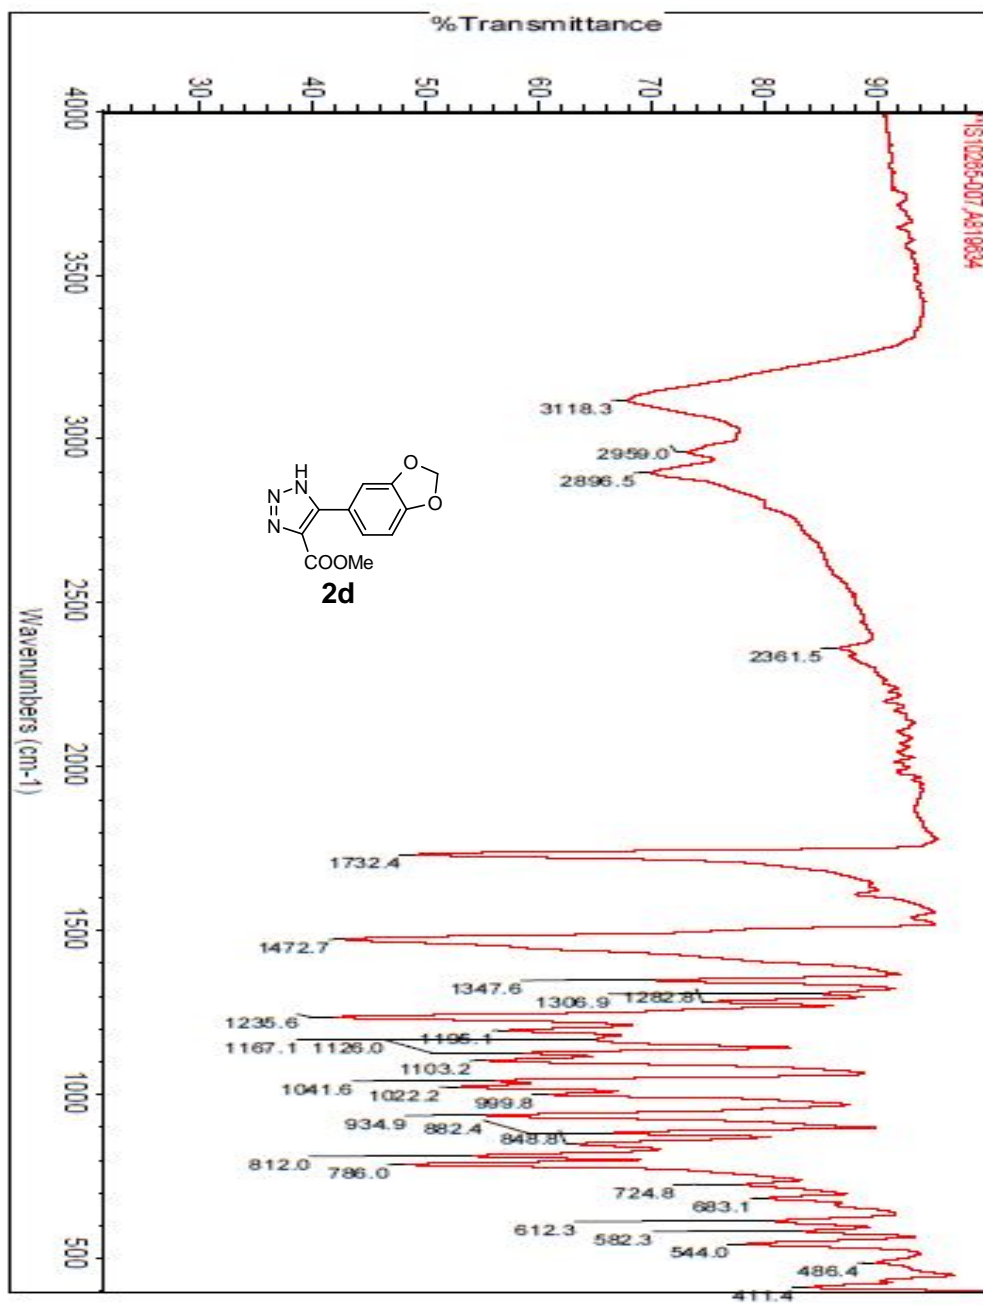

IR (**2d**)

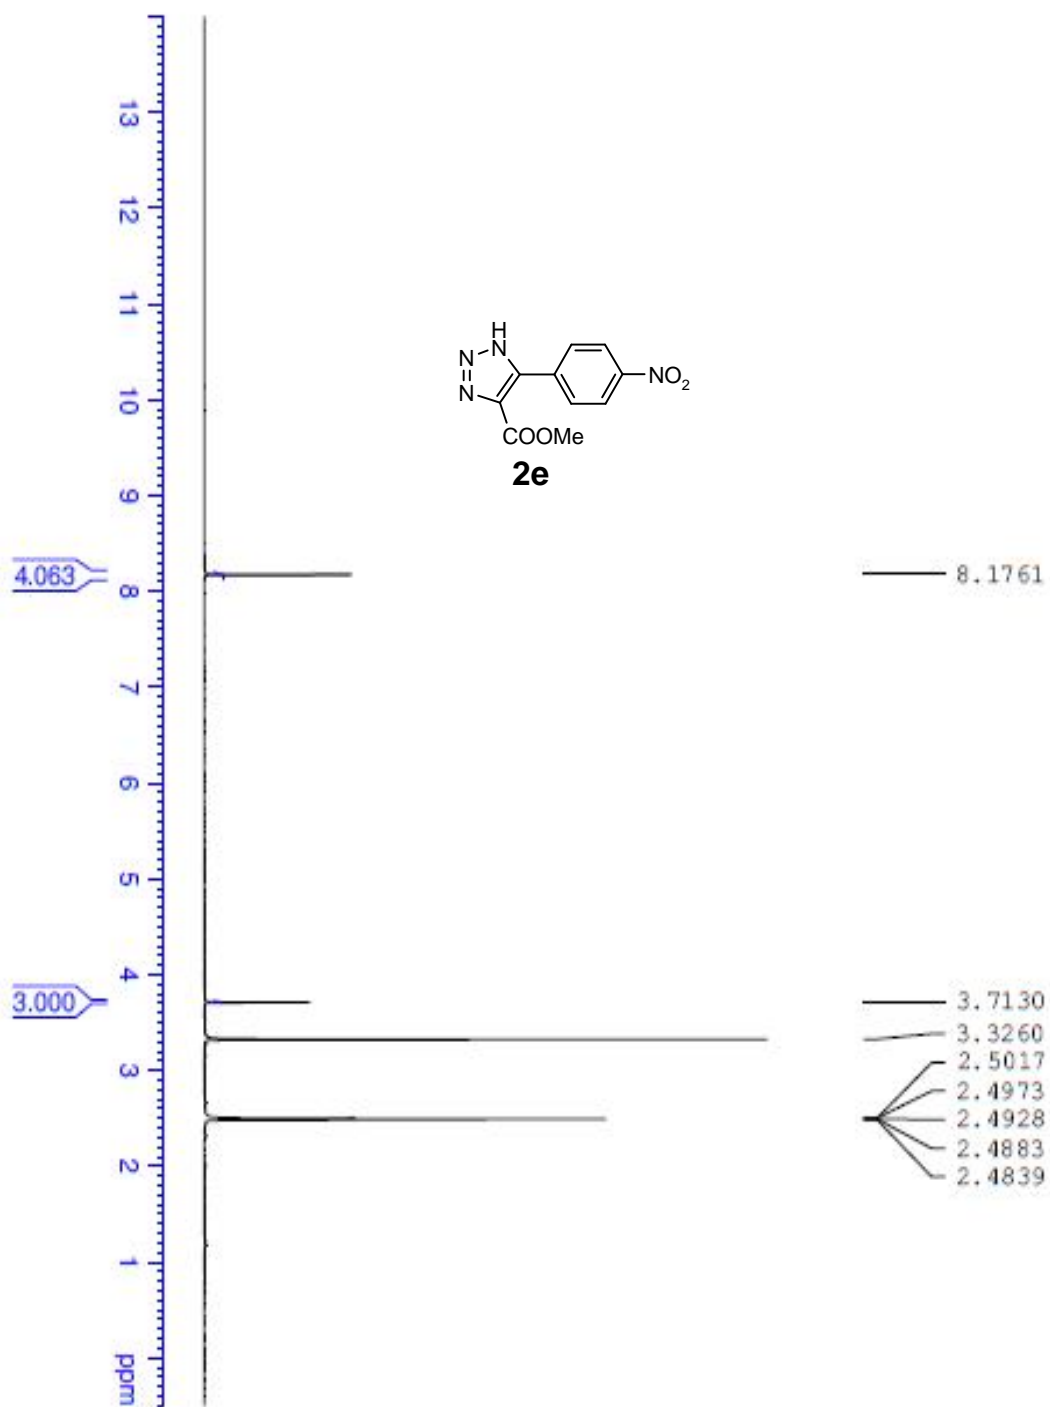

<sup>1</sup>H NMR (400 MHz) in DMSO-*d*<sub>6</sub> (**2e**)

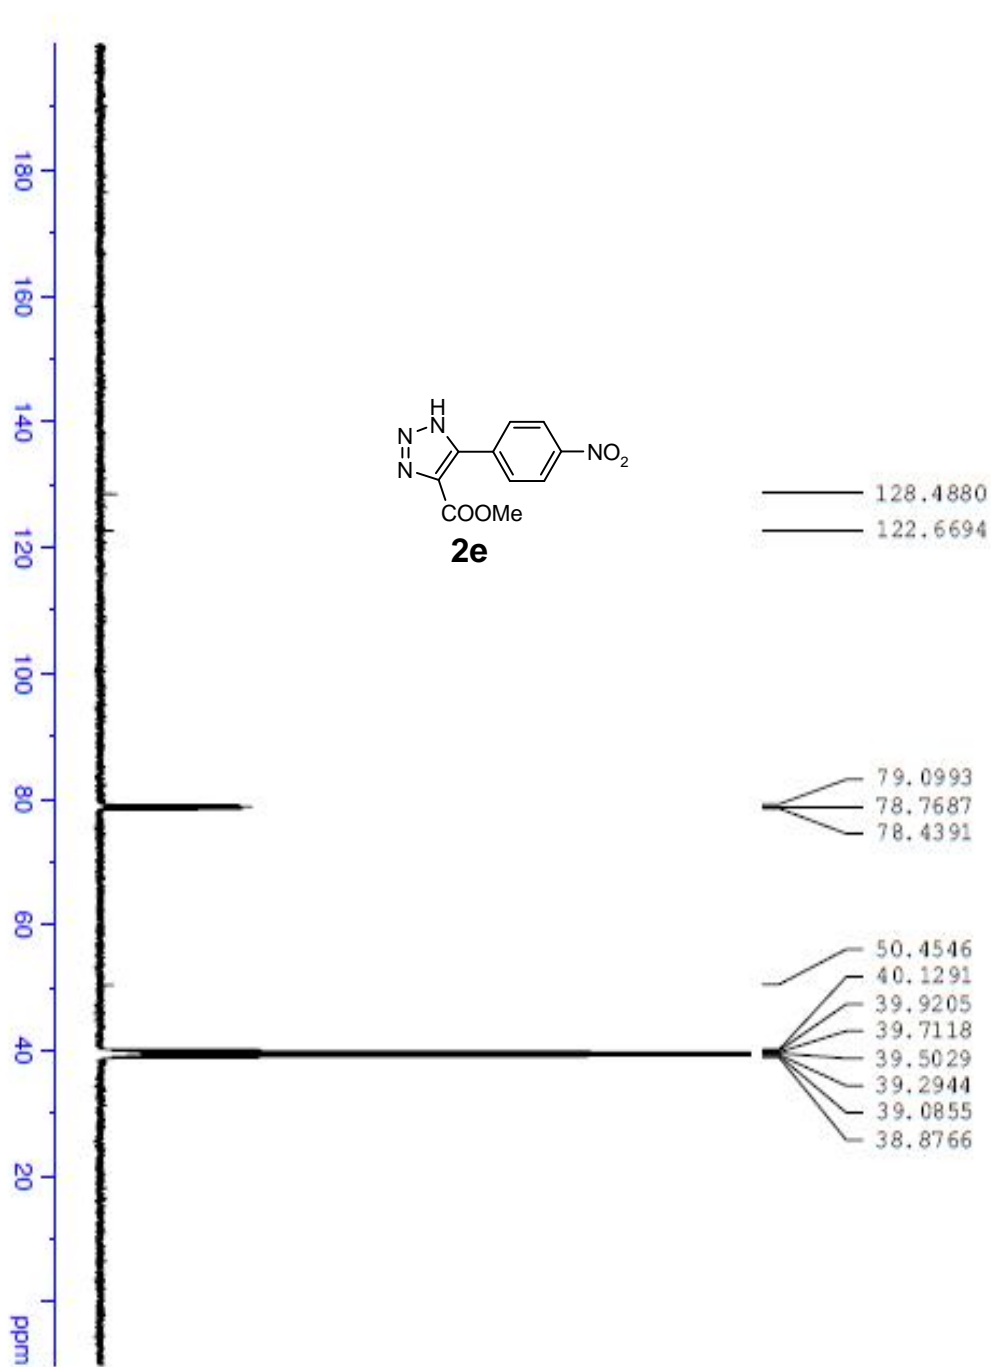

$^{13}\text{C}$  NMR (100 MHz) in  $\text{DMSO-}d_6$  (**2e**)

Method info :

A-10mM NH<sub>4</sub>HCO<sub>3</sub> IN H<sub>2</sub>O , B- ACN Flow: 1.0 ml/min  
COLUMN: XBridge C8 (50X4.6mm, 3.5µm), -ve mode

| TIME | %B  |
|------|-----|
| 0    | 05  |
| 8.0  | 100 |
| 8.1  | 100 |
| 8.5  | 05  |
| 10   | 05  |

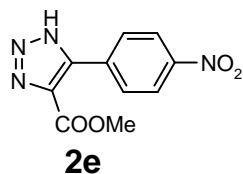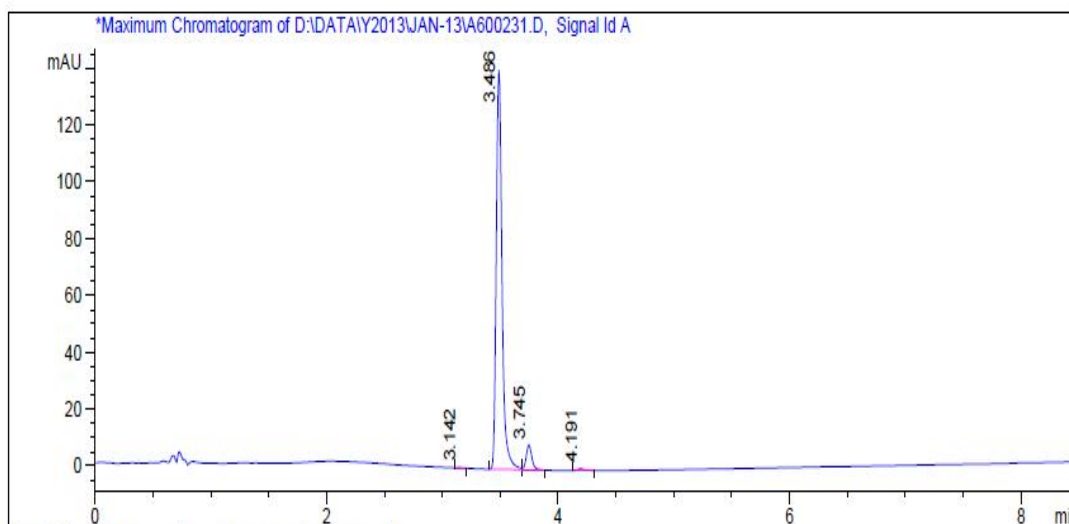

| Peak No | RT min | Area        | Area % |
|---------|--------|-------------|--------|
| 1       | 3.142  | 18.734e-001 | 0.168  |
| 2       | 3.486  | 14.870e+002 | 93.408 |
| 3       | 3.745  | 13.046e+001 | 5.842  |
| 4       | 4.191  | 13.042e+000 | 0.583  |

HPLC (2e)

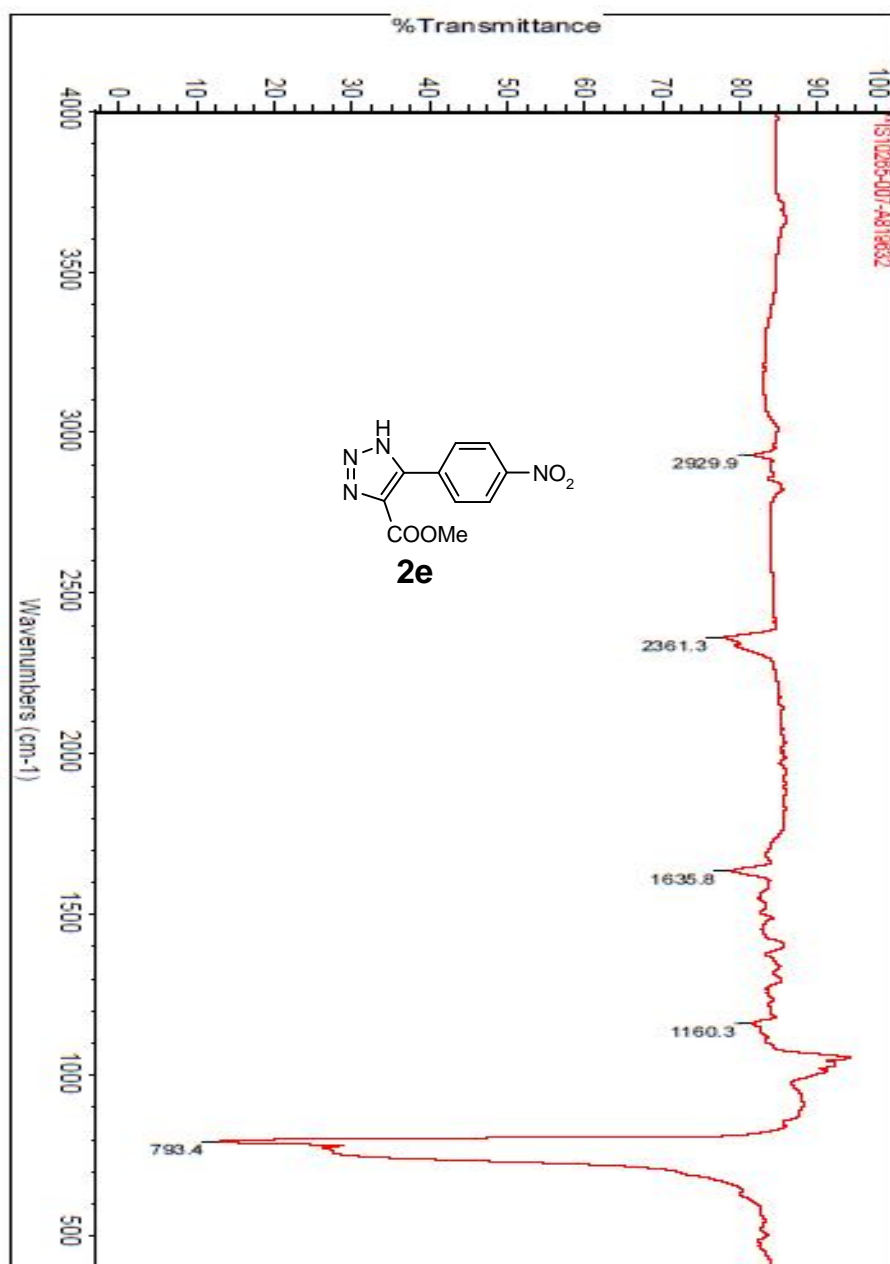

IR (**2e**)

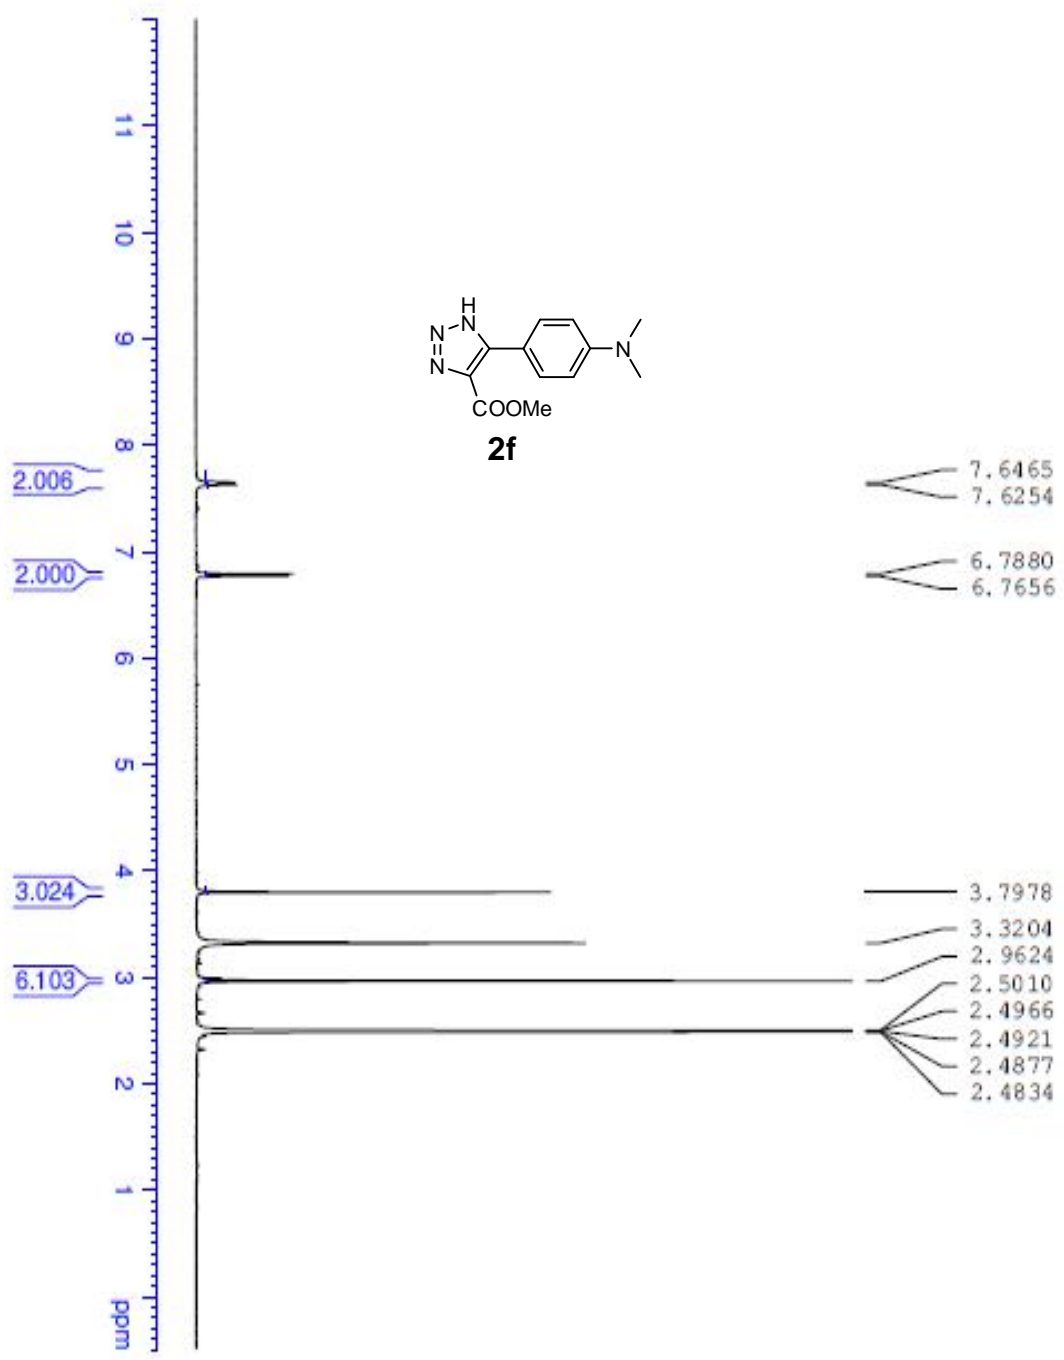

<sup>1</sup>H NMR (400 MHz) in DMSO-*d*<sub>6</sub> (**2f**)

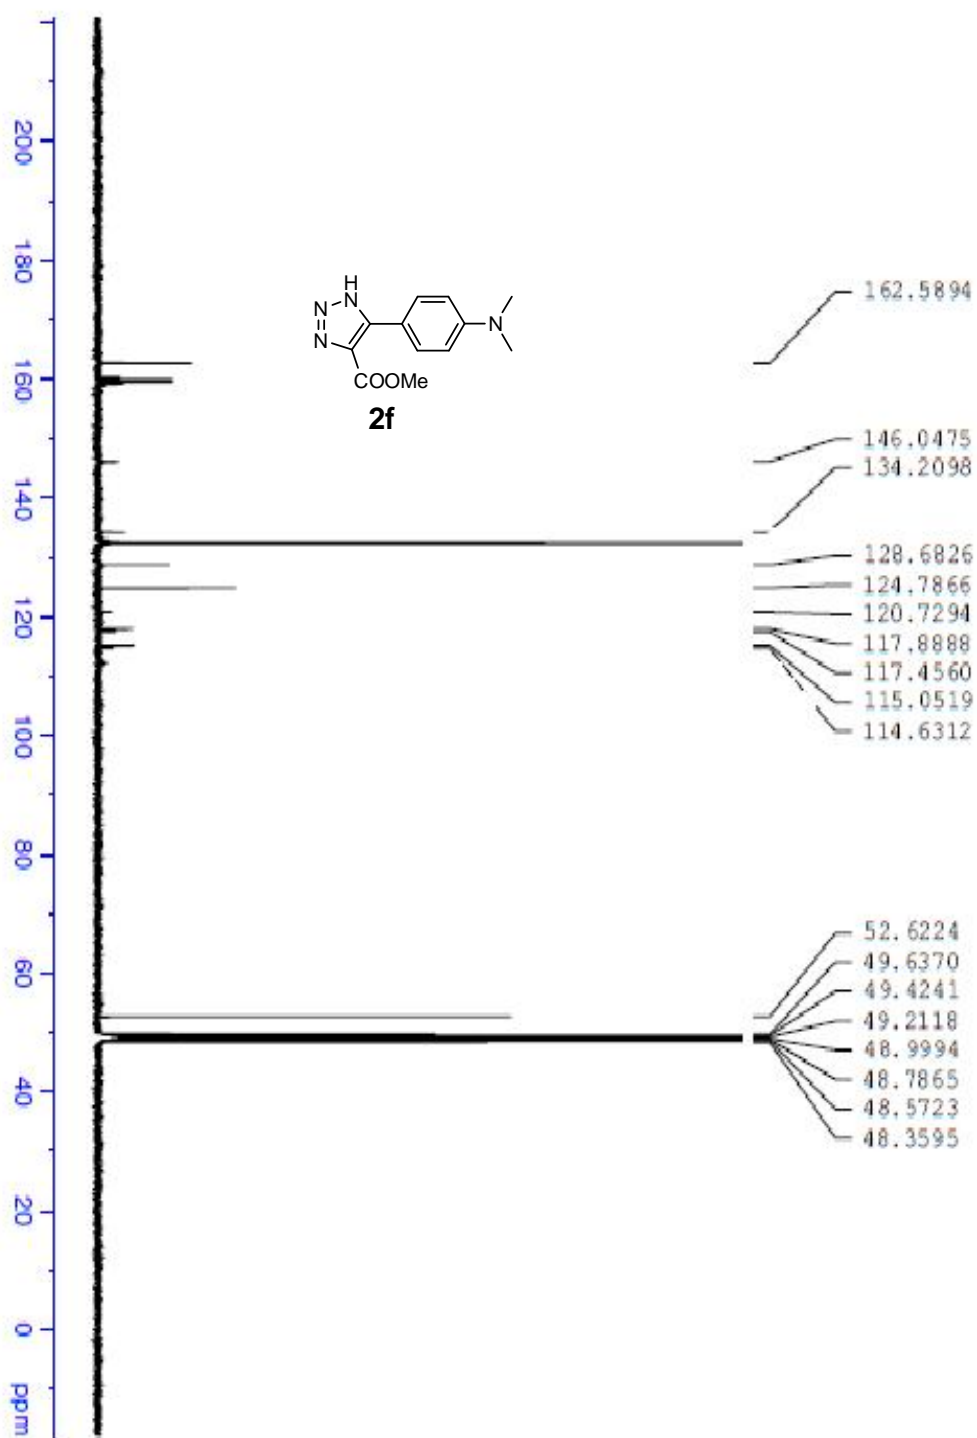

$^{13}\text{C}$  NMR (100 MHz) in  $\text{DMSO-}d_6 + \text{CF}_3\text{COOD}$  (**2f**)

Method info : A: 0.1% TFA IN H2O , B:0.1% TFA IN ACN ; Flow Rate:2.0 ml/min  
 COLUMN:XBridge C8 (50x4.6mm, 3.5μ), +ve mode

| TIME | %B  |
|------|-----|
| 0    | 05  |
| 8.0  | 100 |
| 8.1  | 100 |
| 8.5  | 05  |
| 10.0 | 05  |

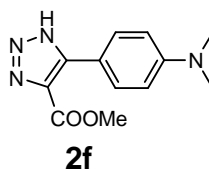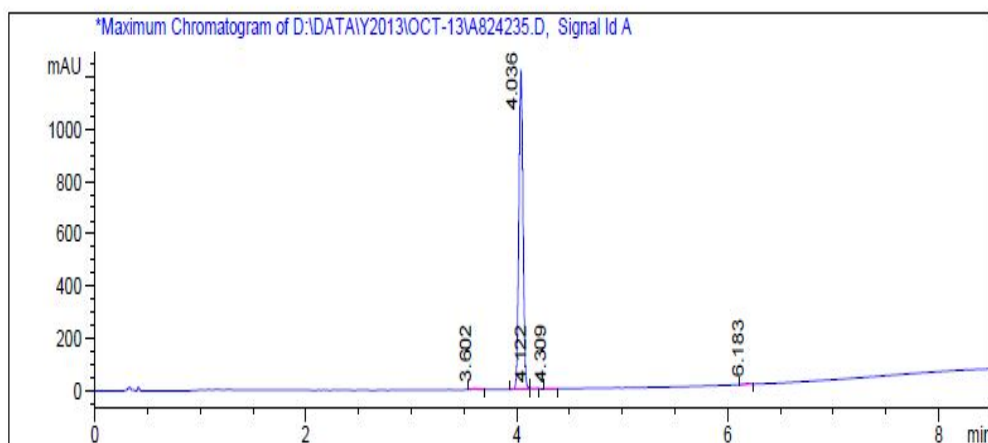

| Peak No | RT min | Area       | Area % |
|---------|--------|------------|--------|
| 1       | 3.602  | 1.739e+001 | 0.511  |
| 2       | 4.036  | 3.359e+003 | 98.680 |
| 3       | 4.122  | 4.808e+000 | 0.141  |
| 4       | 4.309  | 9.103e+000 | 0.267  |
| 5       | 6.183  | 1.361e+001 | 0.400  |

HPLC (2f)



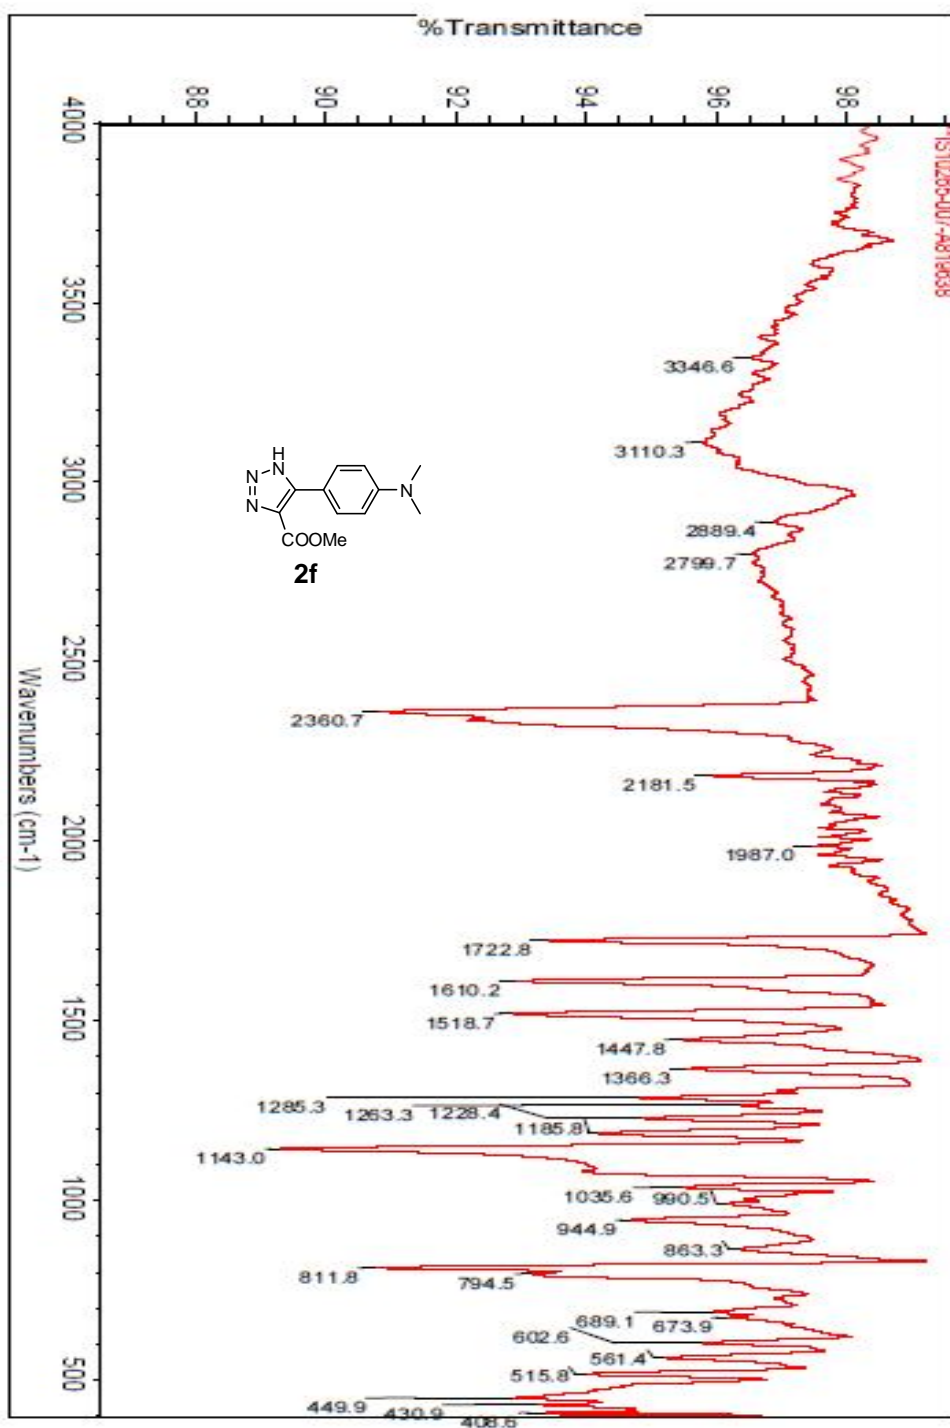

IR (2f)

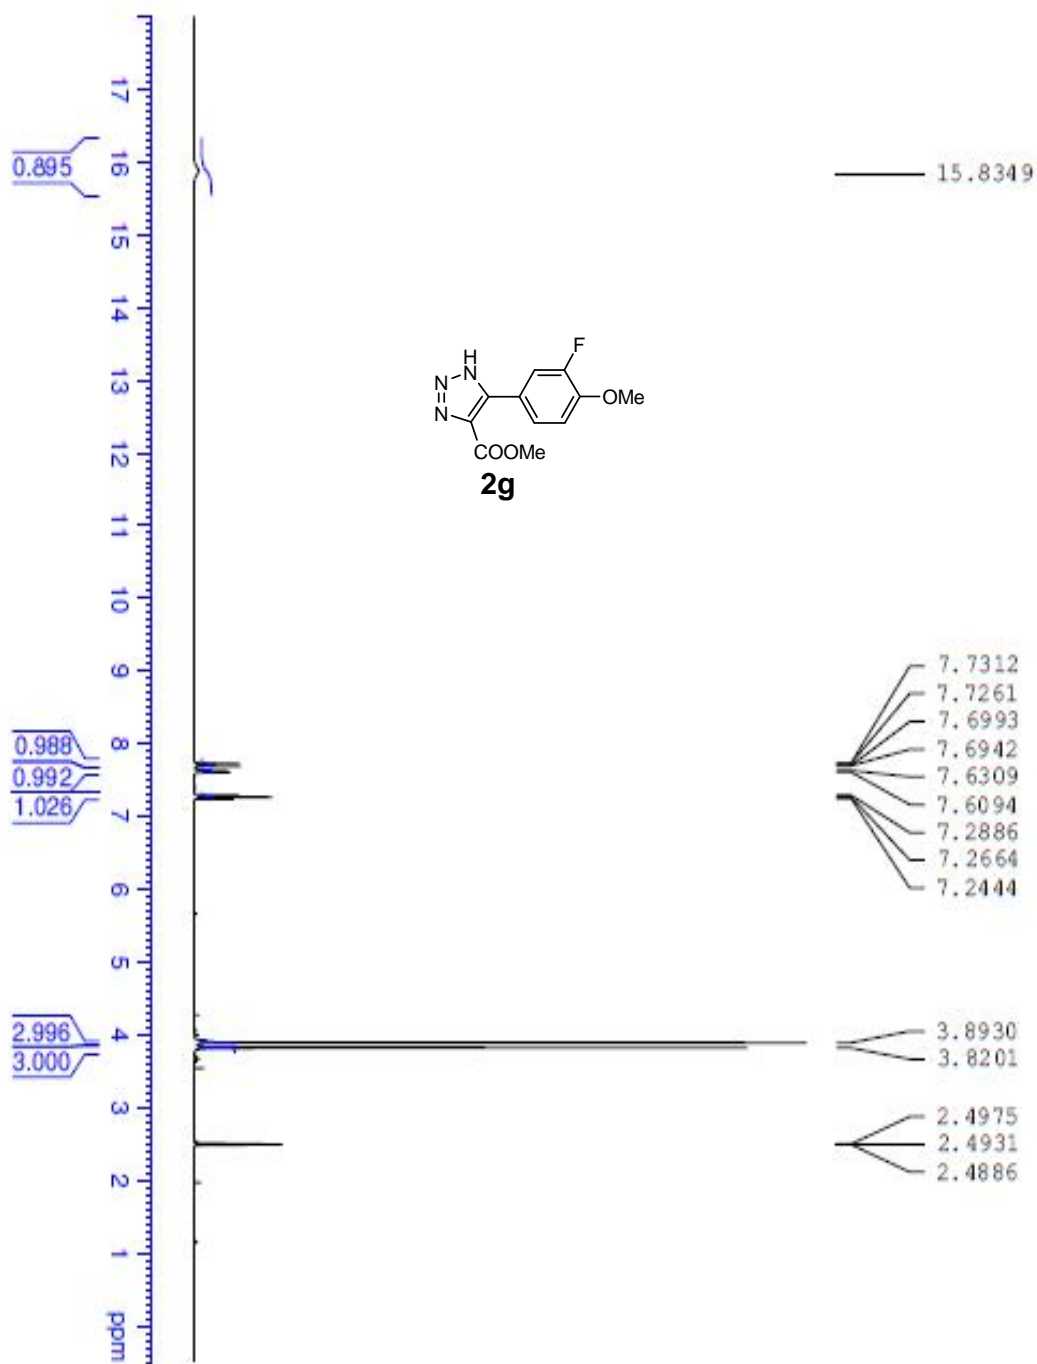

<sup>1</sup>H NMR (400 MHz) in DMSO-*d*<sub>6</sub> (2g)

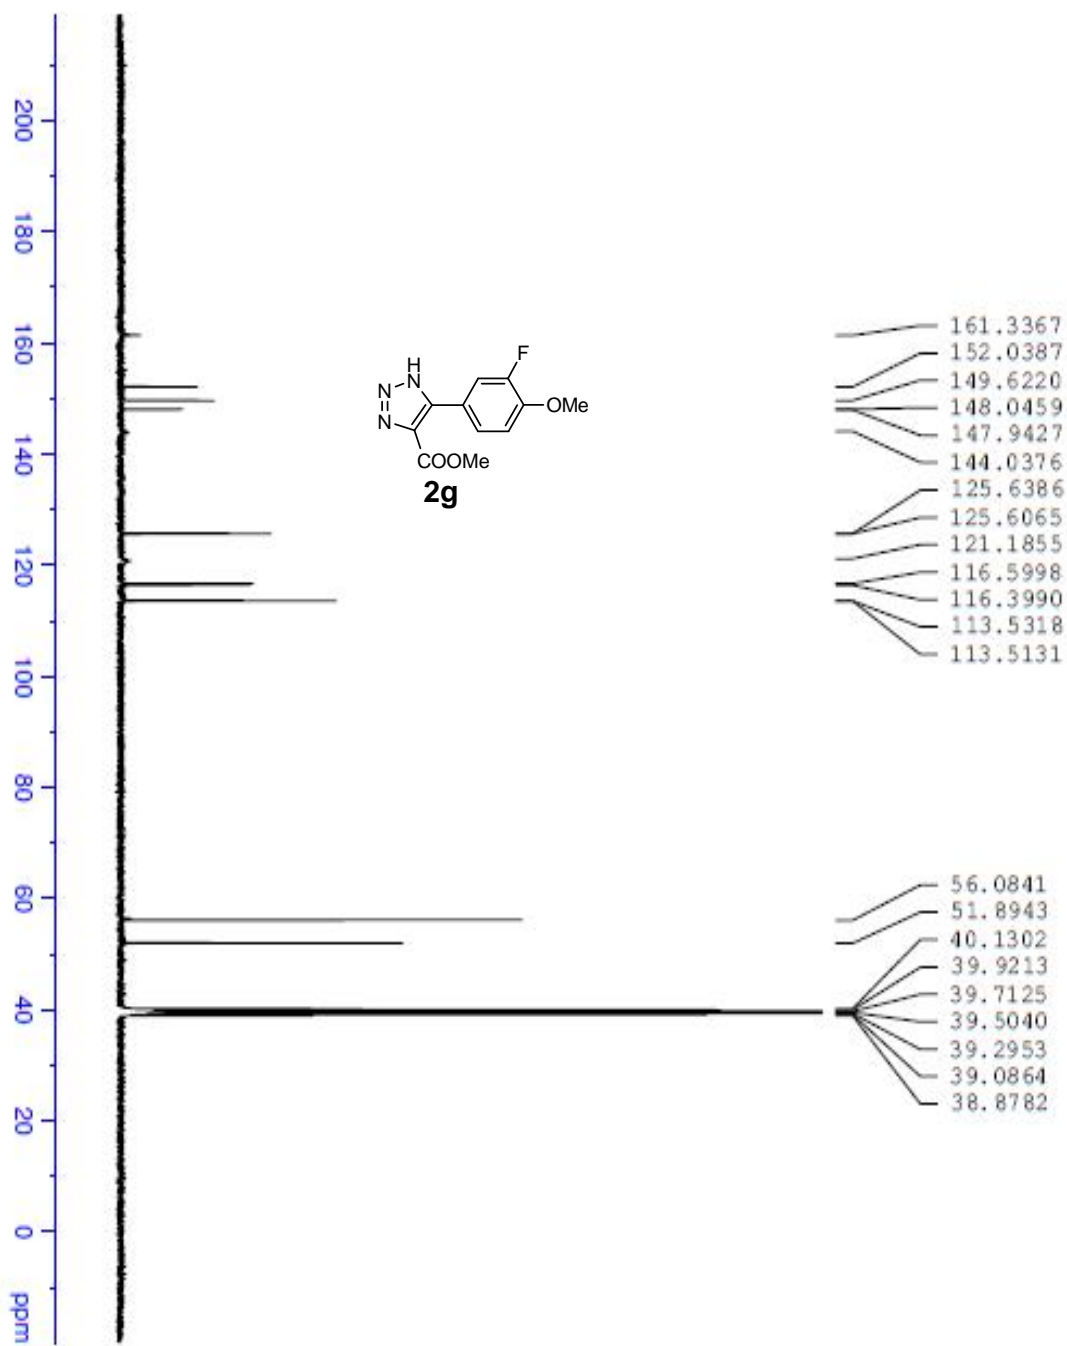

<sup>13</sup>C NMR (100 MHz) in DMSO-*d*<sub>6</sub> (2g)

Method info : A: 0.1% TFA IN H2O , B:0.1% TFA IN ACN ; Flow Rate:2.0 ml/min  
 COLUMN:XBridge C8 (50x4.6mm, 3.5µm), +ve mode

| TIME | %B  |
|------|-----|
| 0    | 05  |
| 8.0  | 100 |
| 8.1  | 100 |
| 8.5  | 05  |
| 10   | 05  |

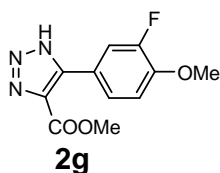

->

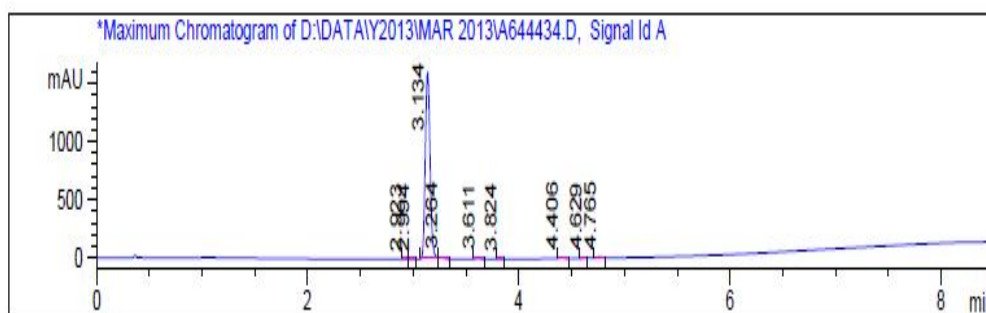

| Peak No | RT min | Area        | Area % |
|---------|--------|-------------|--------|
| 1       | 12.923 | 15.059e+000 | 0.096  |
| 2       | 12.994 | 13.337e+000 | 0.064  |
| 3       | 13.134 | 15.083e+003 | 96.763 |
| 4       | 13.264 | 15.741e+001 | 11.093 |
| 5       | 13.611 | 12.572e+001 | 0.490  |
| 6       | 13.824 | 13.314e+000 | 0.063  |
| 7       | 14.406 | 13.671e+001 | 0.699  |
| 8       | 14.629 | 14.127e+000 | 0.079  |
| 9       | 14.765 | 13.433e+001 | 0.654  |

HPLC (2g)

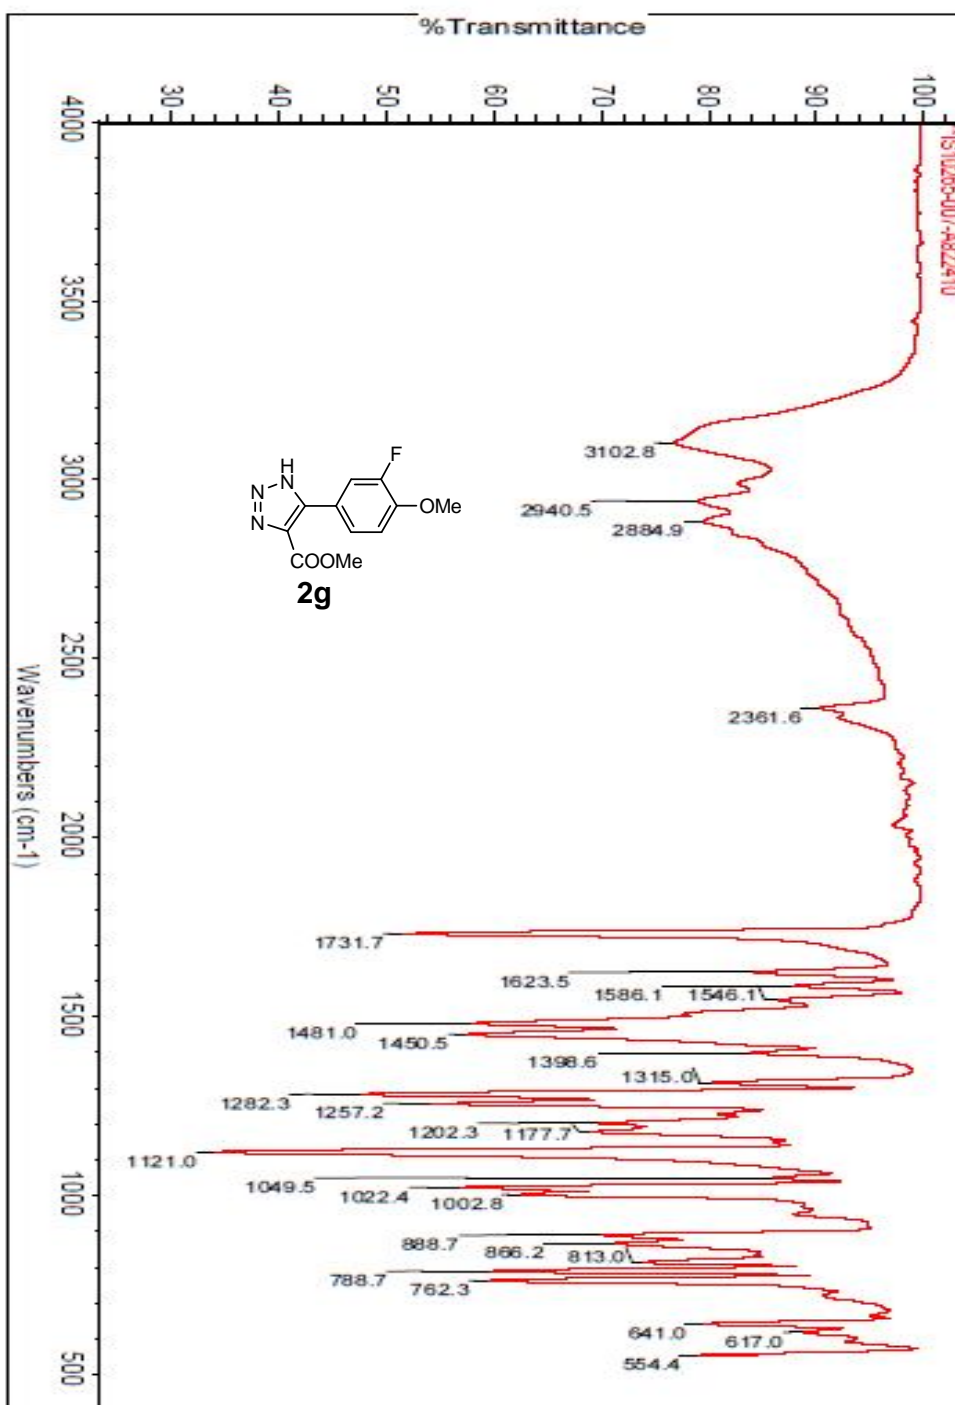

IR (2g)

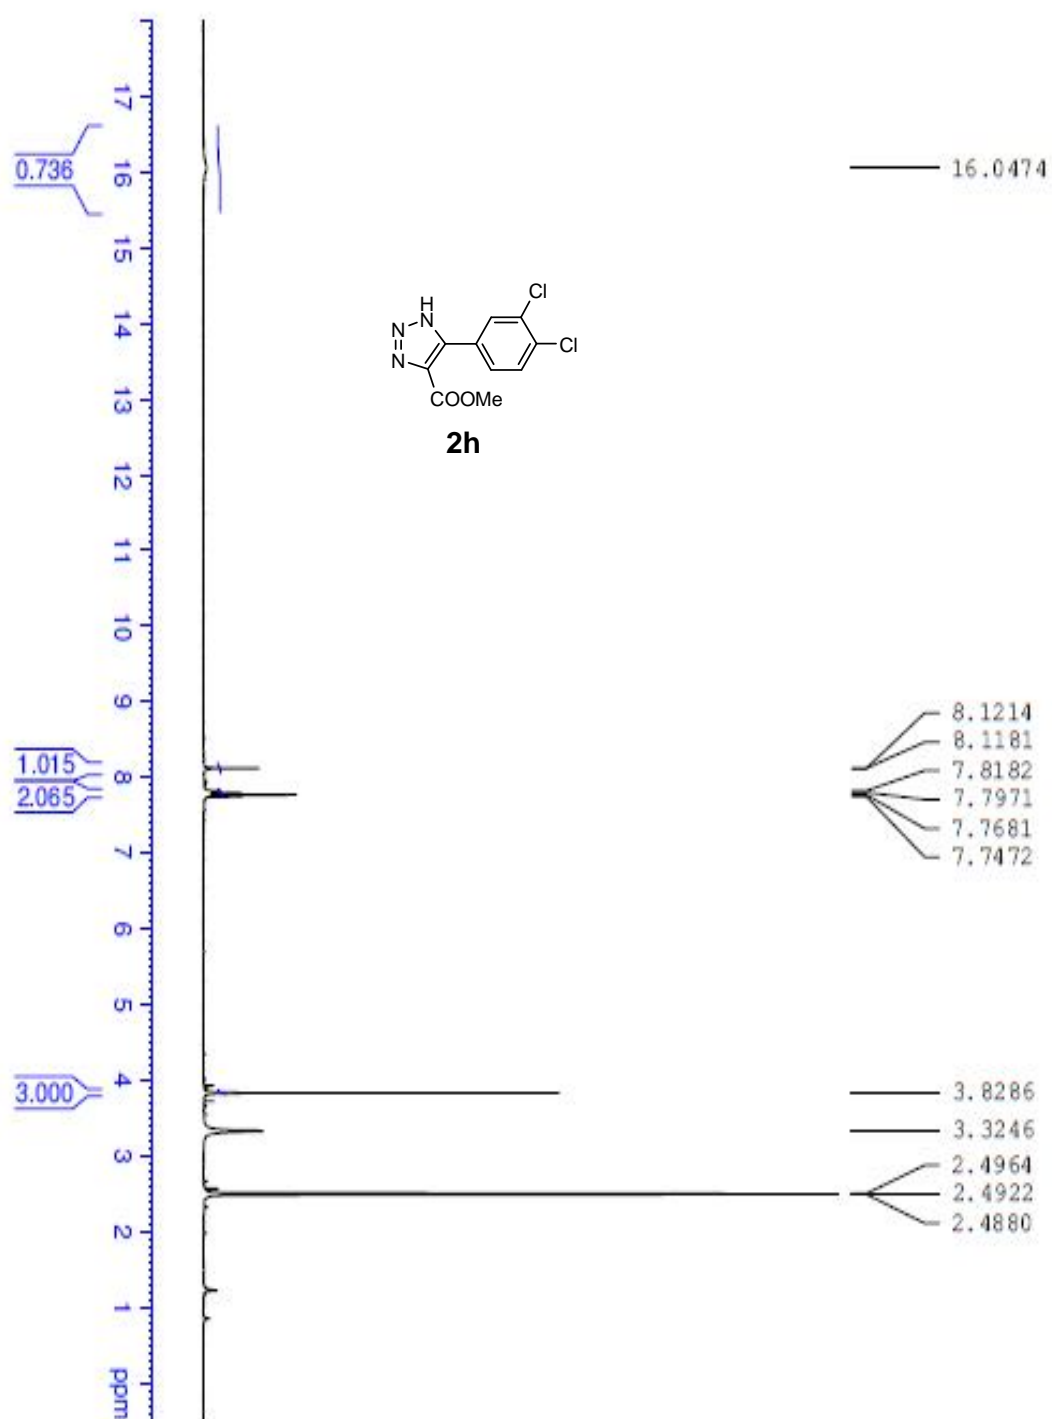

<sup>1</sup>H NMR (400 MHz) in DMSO-*d*<sub>6</sub> (**2h**)

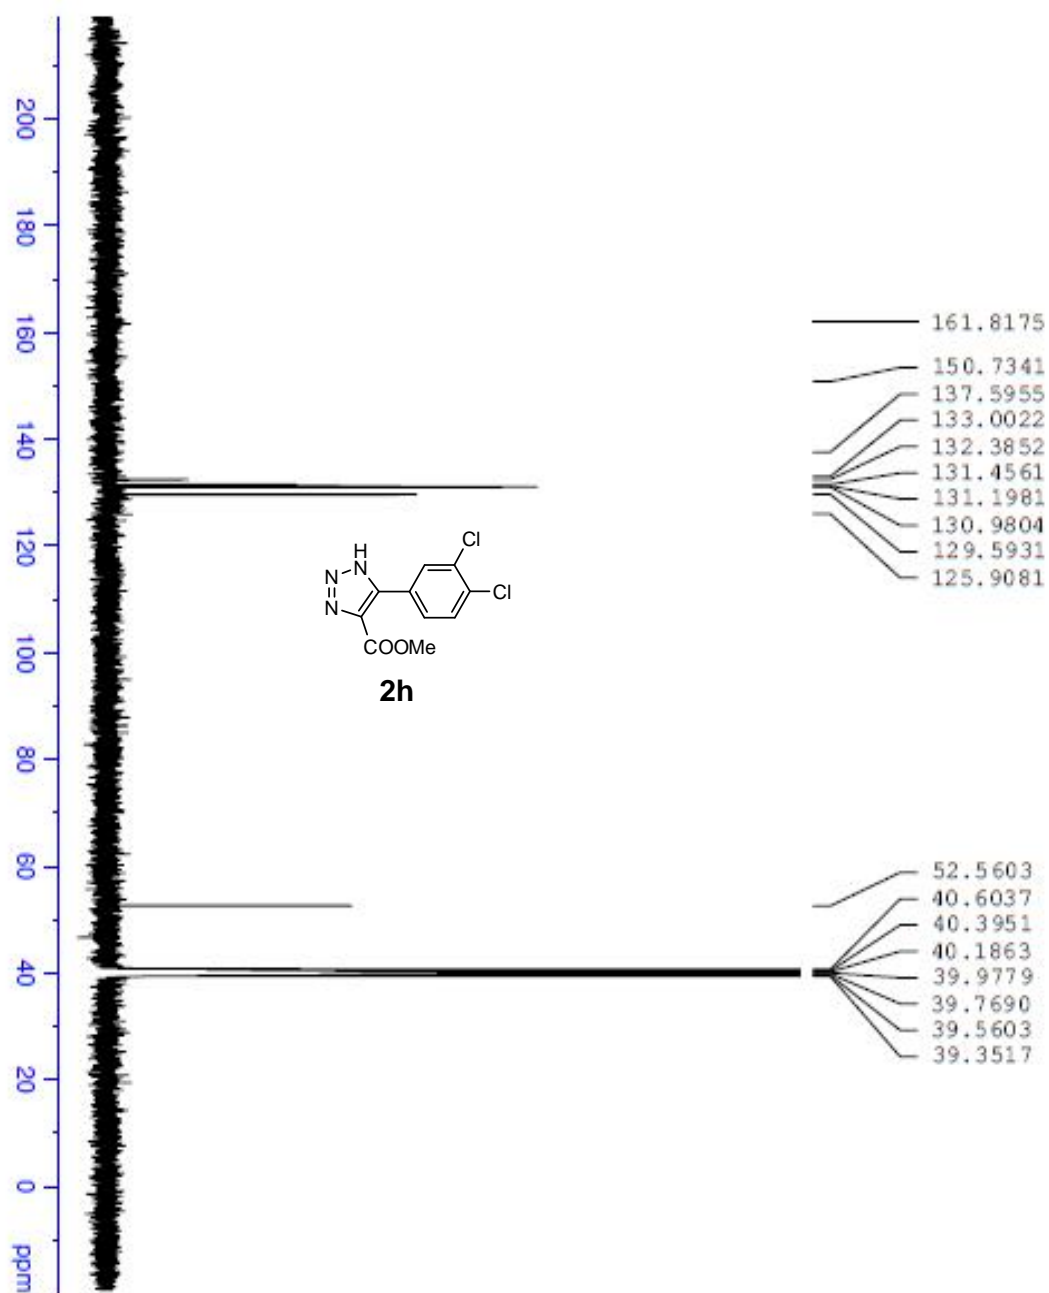

<sup>13</sup>C NMR (100 MHz) in DMSO-*d*<sub>6</sub> (2h)

Method info : A: 0.1% TFA IN H2O , B:0.1% TFA IN ACN ; Flow Rate:2.0 ml/min  
 COLUMN:XBridge C8 (50x4.6mm, 3.5μ), +ve mode

| TIME | %B  |
|------|-----|
| 0    | 05  |
| 8.0  | 100 |
| 8.1  | 100 |
| 8.5  | 05  |
| 10.0 | 05  |

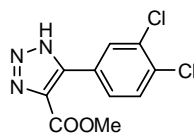

**2h**

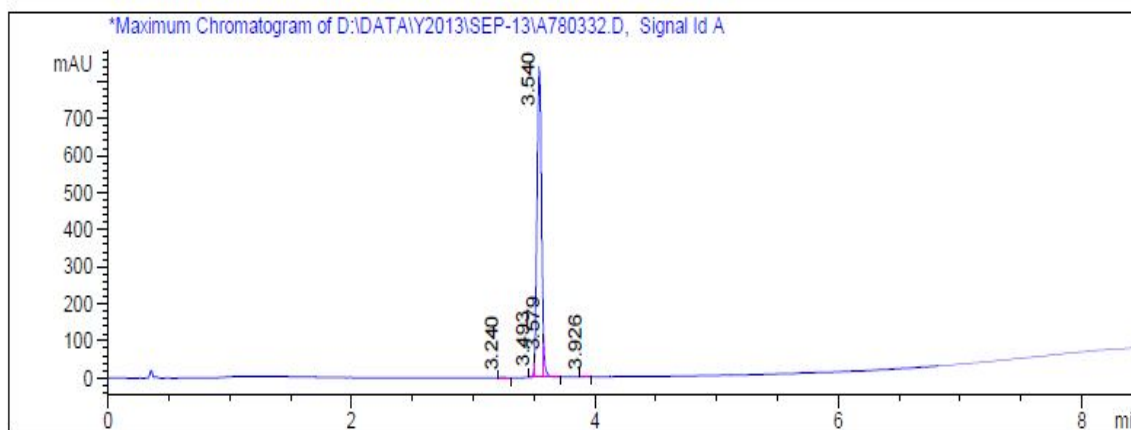

| Peak No | RT min | Area       | Area % |
|---------|--------|------------|--------|
| 1       | 3.240  | 3.498e+000 | 0.157  |
| 2       | 3.493  | 1.341e+001 | 0.603  |
| 3       | 3.540  | 2.147e+003 | 96.483 |
| 4       | 3.579  | 5.926e+001 | 2.663  |
| 5       | 3.926  | 2.092e+000 | 0.094  |

**HPLC (2h)**



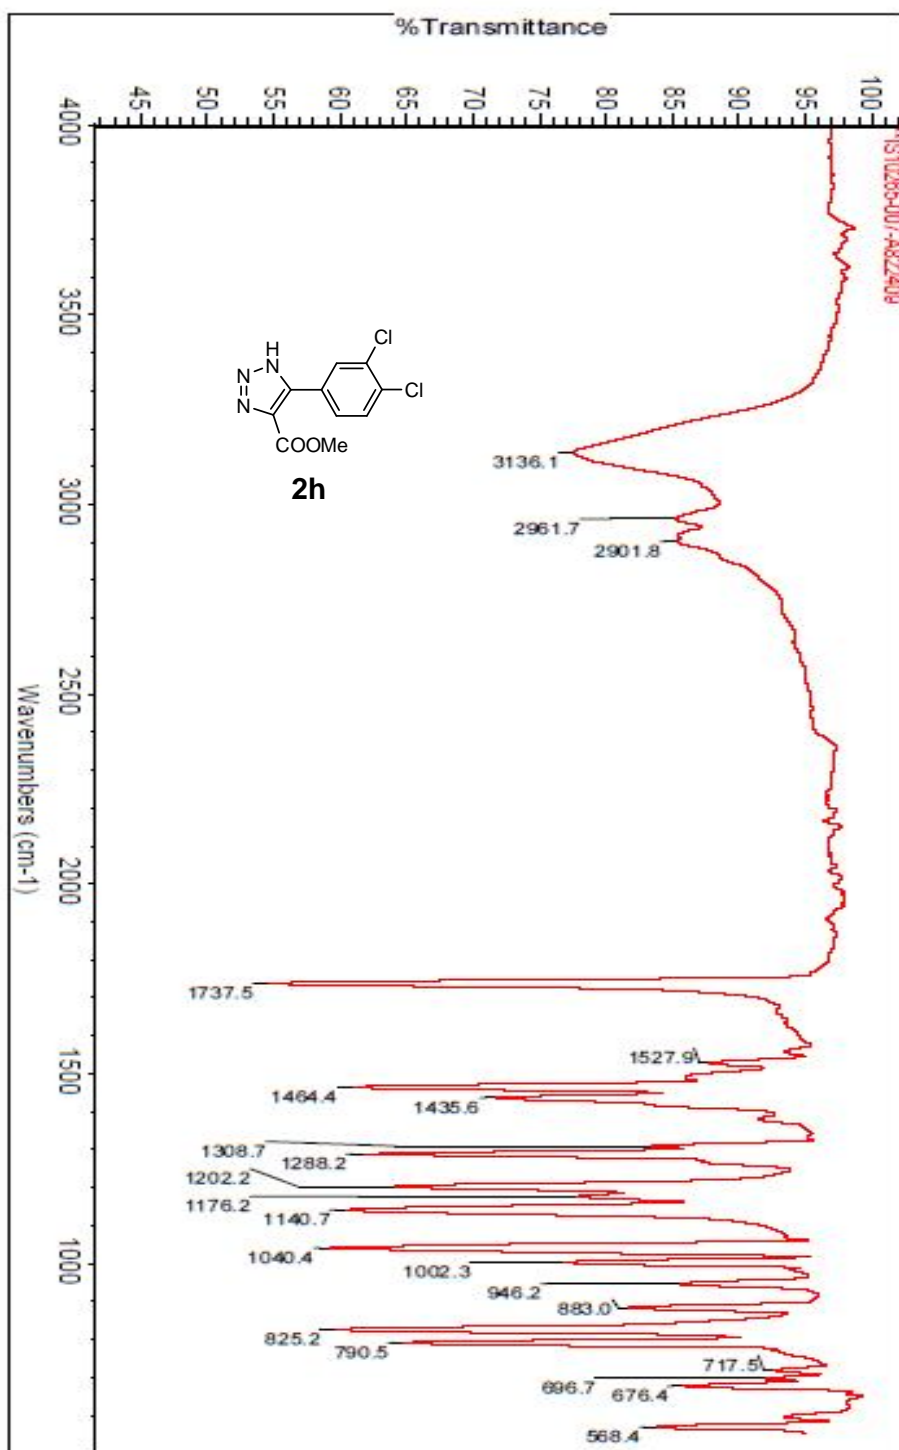

IR (**2h**)

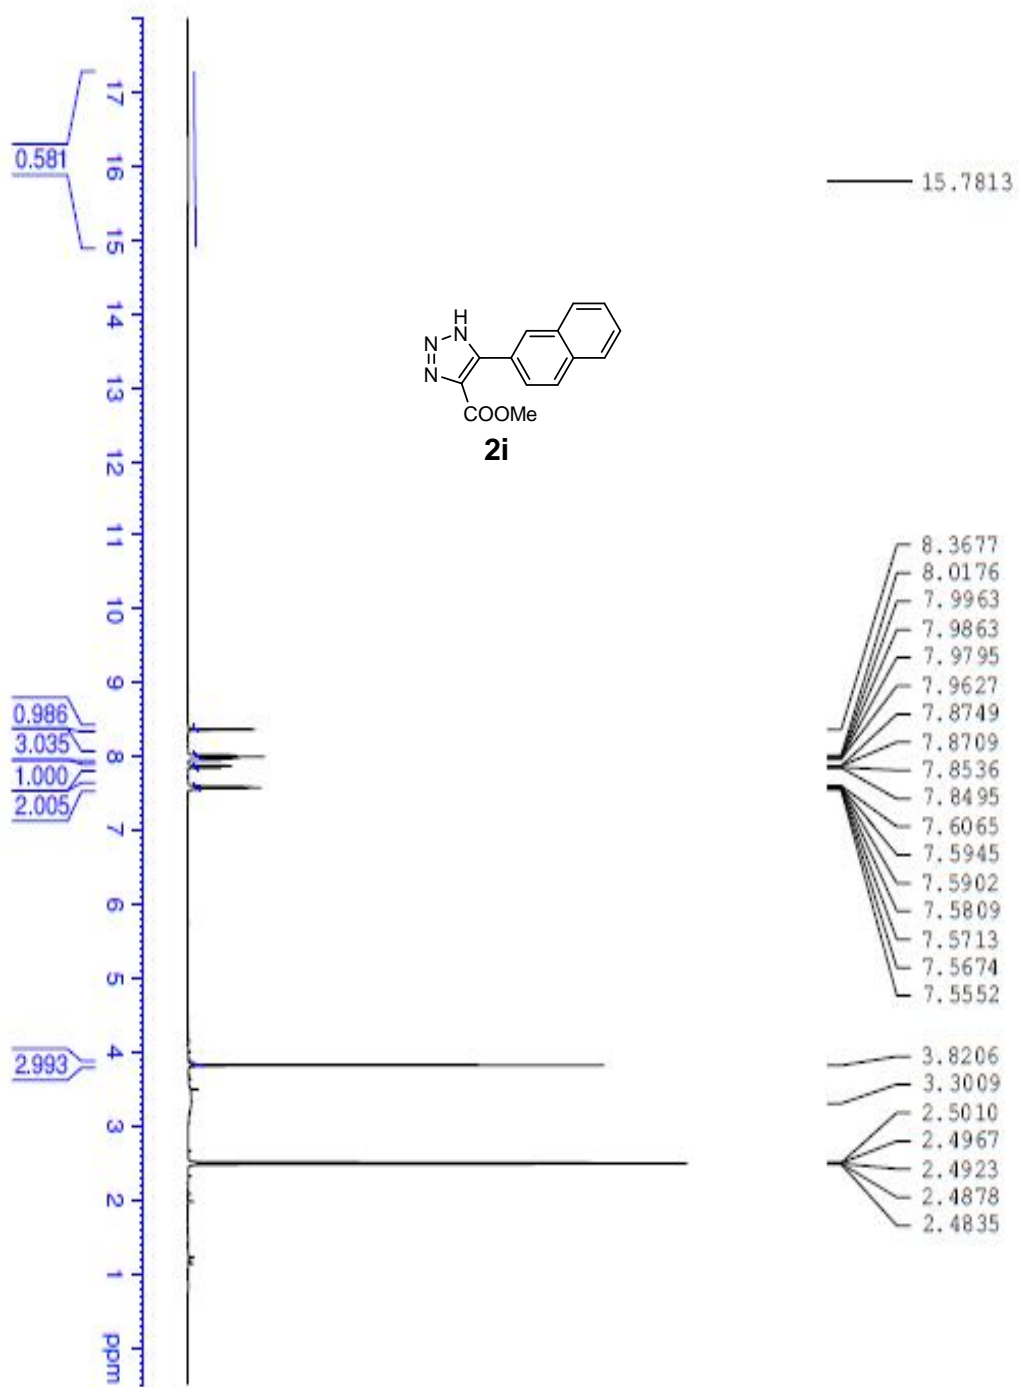

<sup>1</sup>H NMR (400 MHz) in DMSO-*d*<sub>6</sub> (2i)

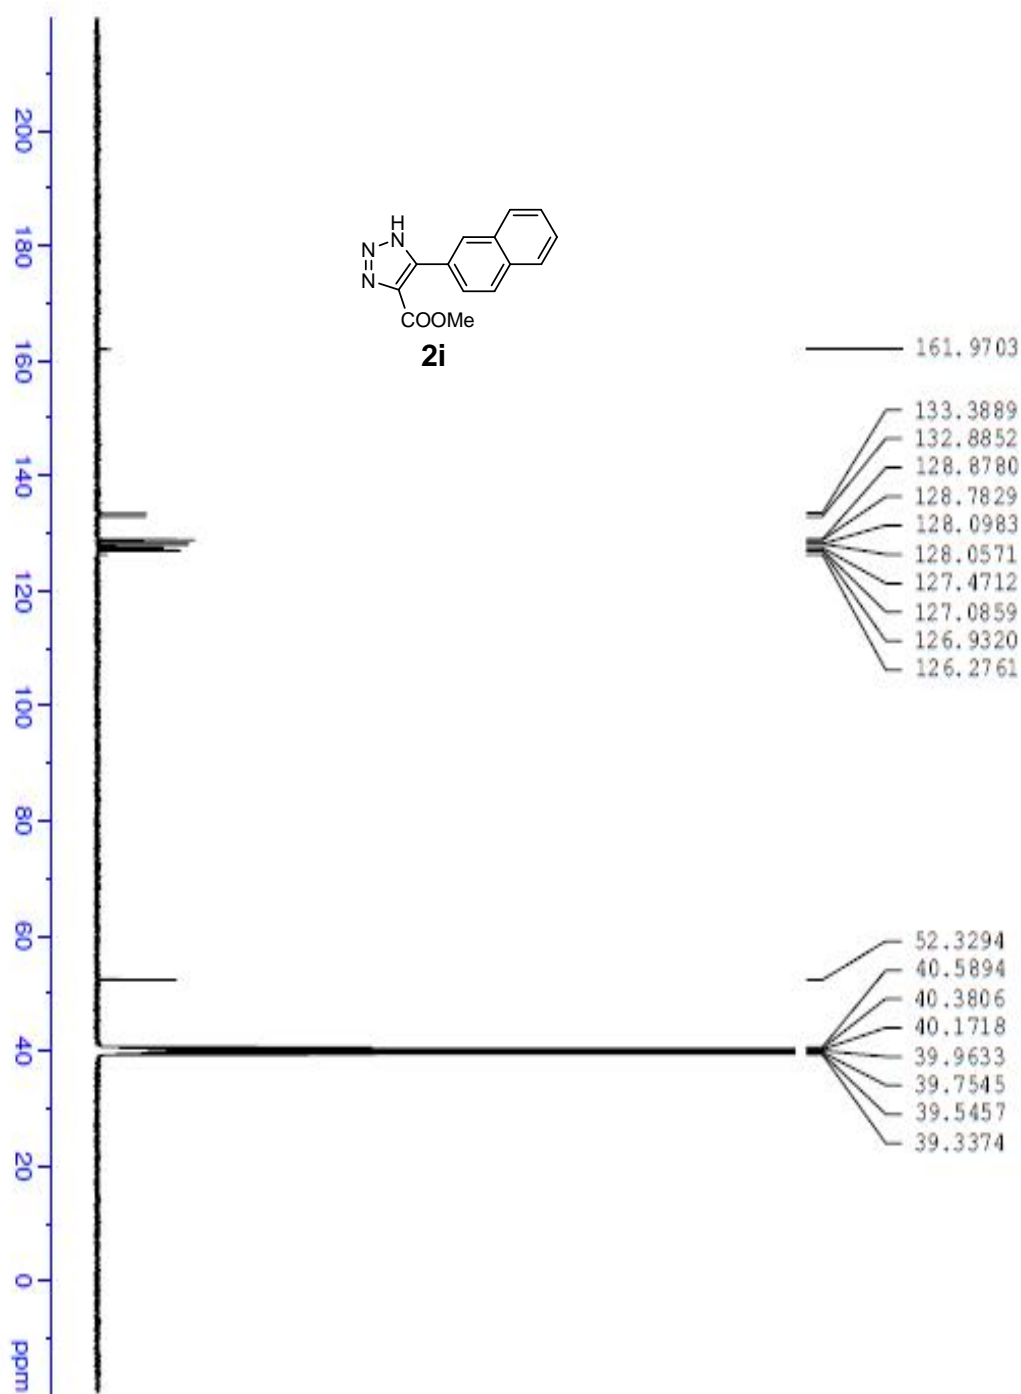

$^{13}\text{C}$  NMR (100 MHz) in  $\text{DMSO-}d_6$  (**2i**)

Method info : A:0.1%TFA in H2O, B:0.1%TFA in ACN, Flow Rate:2.0ml/min  
 COLUMN: XBridge C8 (50X4.6)mm,3.5µm

| Time | % of B |
|------|--------|
| 0    | 5      |
| 8.0  | 100    |
| 8.1  | 100    |
| 8.5  | 5      |
| 10.0 | 5      |

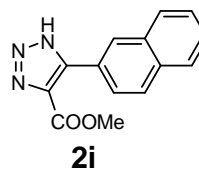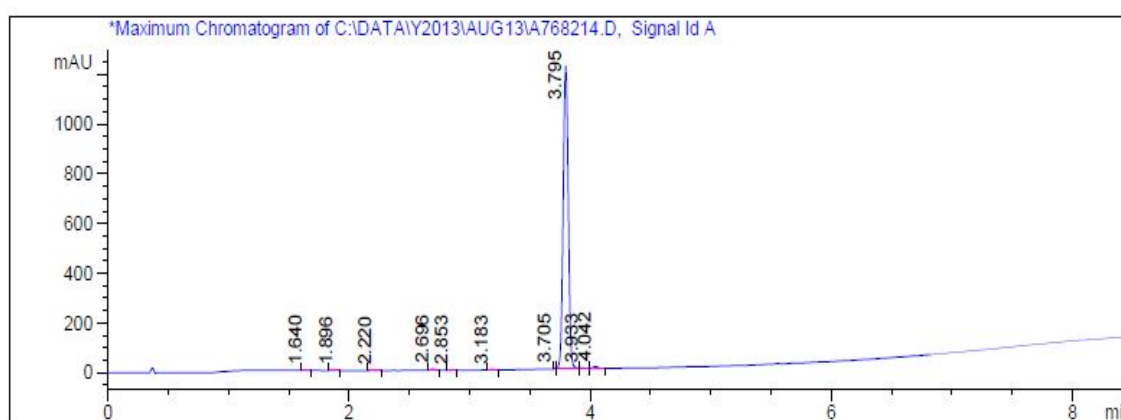

| Peak No | RT min | Area       | Area % |
|---------|--------|------------|--------|
| 11      | 1.640  | 3.772e+000 | 0.10   |
| 12      | 1.896  | 1.726e+000 | 0.05   |
| 13      | 2.220  | 3.651e+000 | 0.10   |
| 14      | 2.696  | 1.596e+001 | 0.44   |
| 15      | 2.853  | 6.188e+000 | 0.17   |
| 16      | 3.183  | 6.152e+000 | 0.17   |
| 17      | 3.705  | 3.436e+000 | 0.09   |
| 18      | 3.795  | 3.554e+003 | 97.82  |
| 19      | 3.933  | 9.567e+000 | 0.26   |
| 110     | 4.042  | 2.888e+001 | 0.79   |

## HPLC (2i)

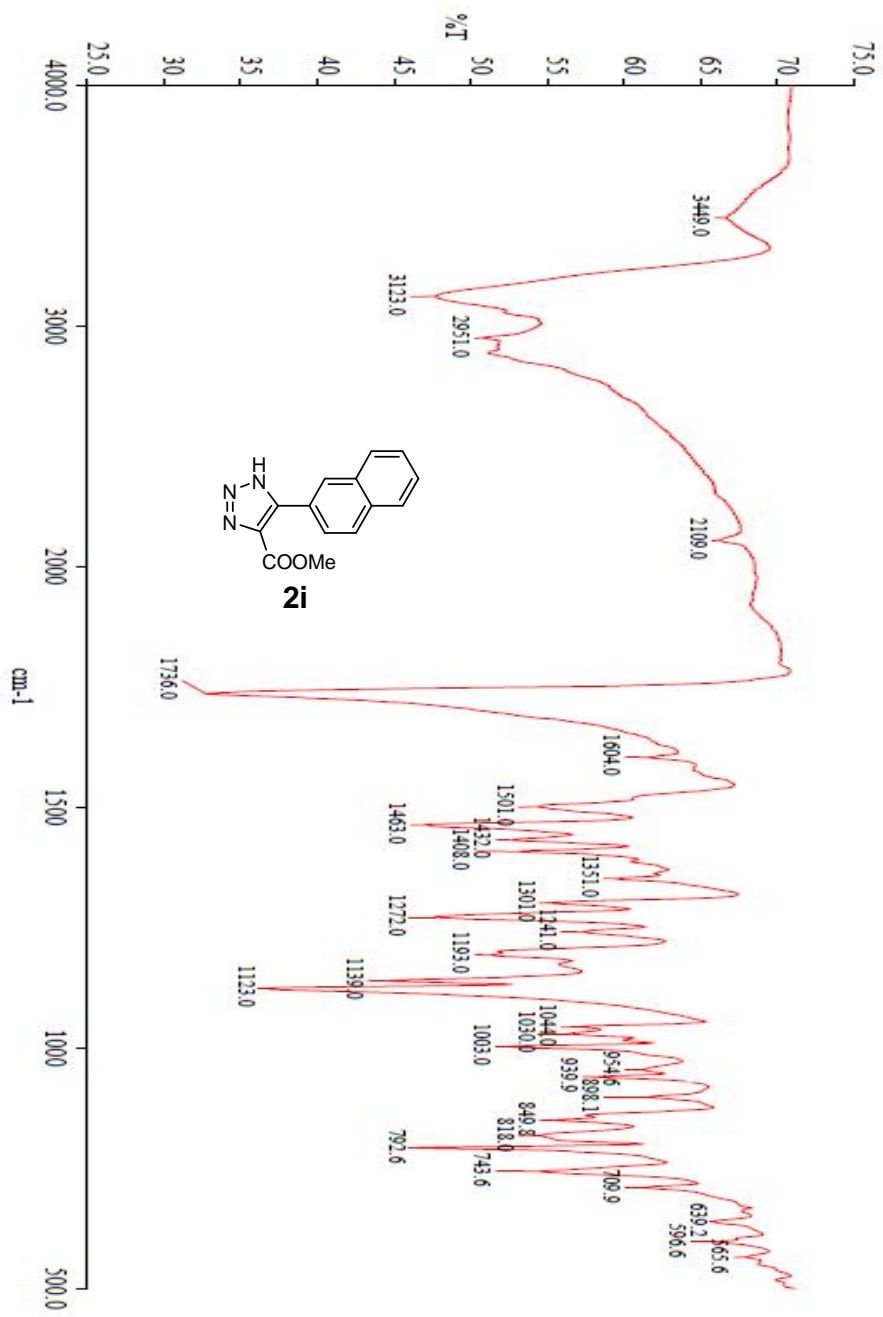

IR (**2i**)

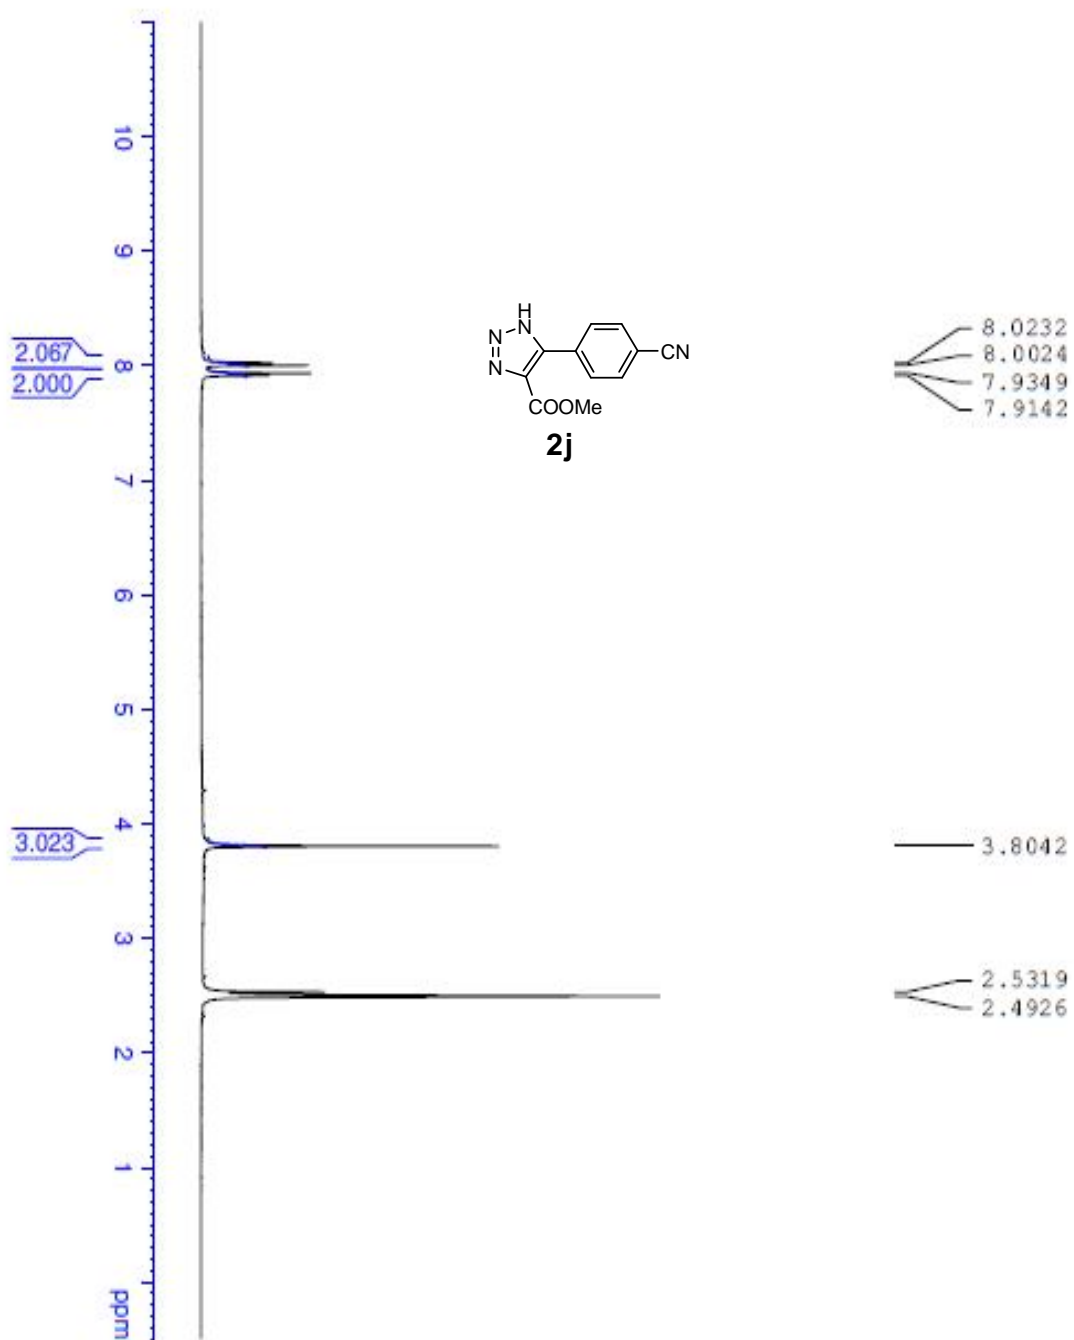

<sup>1</sup>H NMR (400 MHz) in DMSO-*d*<sub>6</sub> (**2j**)

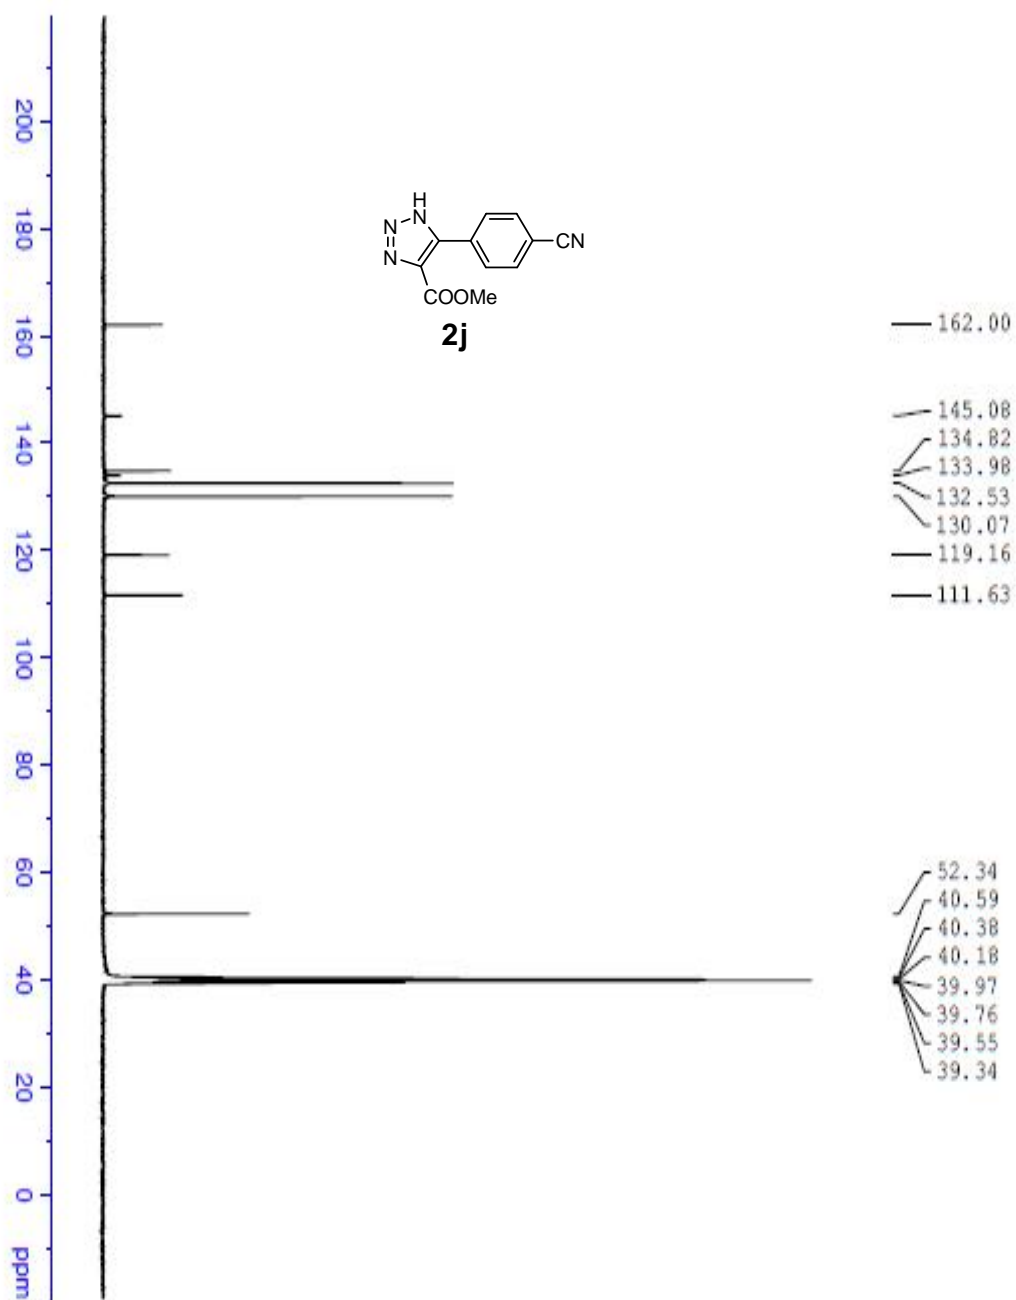

$^{13}\text{C}$  NMR (100 MHz) in  $\text{DMSO-}d_6$  (**2j**)

Method info :

A-10mM NH<sub>4</sub>HCO<sub>3</sub> IN H<sub>2</sub>O , B- ACN Flow: 1.0 ml/min  
COLUMN: XBridge C8 (50X4.6mm, 3.5µm), -ve mode

| TIME | %B  |
|------|-----|
| 0    | 05  |
| 8.0  | 100 |
| 8.1  | 100 |
| 8.5  | 05  |
| 10   | 05  |

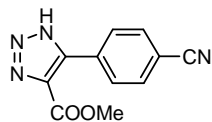

**2j**

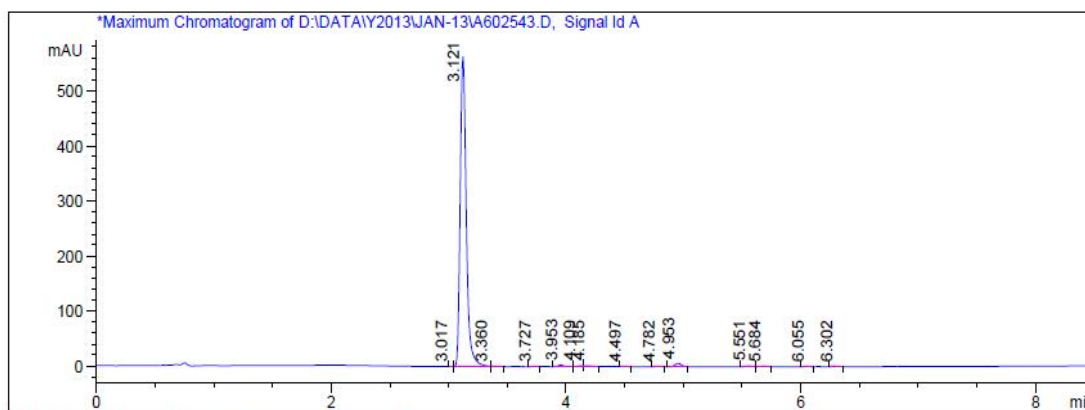

| Peak No | RT min | Area        | Area % |
|---------|--------|-------------|--------|
| 11      | 13.017 | 1.255e+000  | 0.059  |
| 12      | 13.121 | 12.022e+003 | 95.798 |
| 13      | 13.360 | 14.956e+000 | 0.235  |
| 14      | 13.727 | 11.645e+000 | 0.078  |
| 15      | 13.953 | 11.118e+001 | 0.530  |
| 16      | 14.109 | 15.492e+000 | 0.260  |
| 17      | 14.185 | 16.648e+000 | 0.315  |
| 18      | 14.497 | 16.456e+000 | 0.306  |
| 19      | 14.782 | 14.212e+000 | 0.200  |
| 110     | 14.953 | 12.491e+001 | 1.180  |
| 111     | 15.551 | 18.819e+000 | 0.418  |
| 112     | 15.684 | 17.305e+000 | 0.346  |
| 113     | 16.055 | 13.662e+000 | 0.174  |
| 114     | 16.302 | 12.153e+000 | 0.102  |

HPLC (2j)



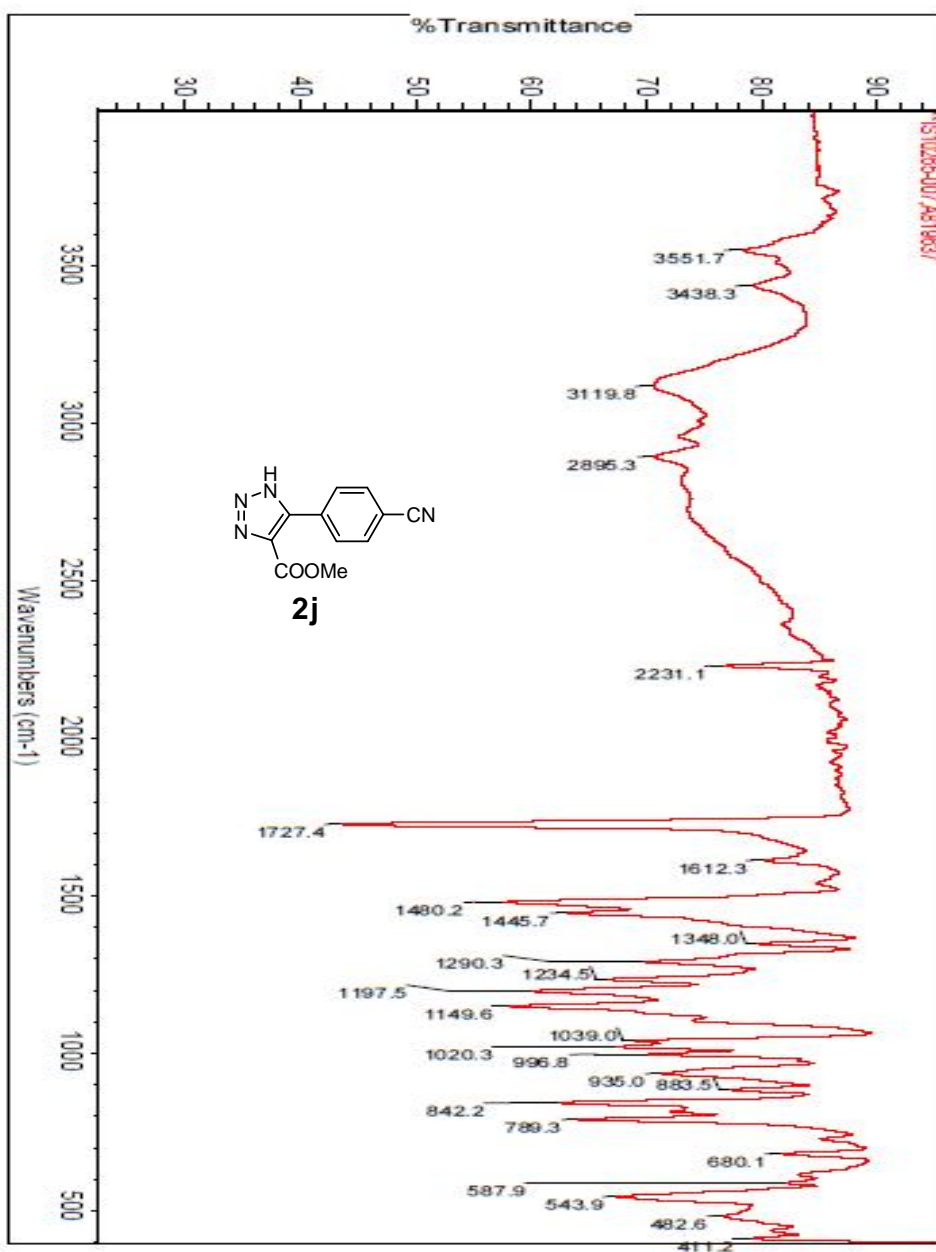

IR (**2j**)

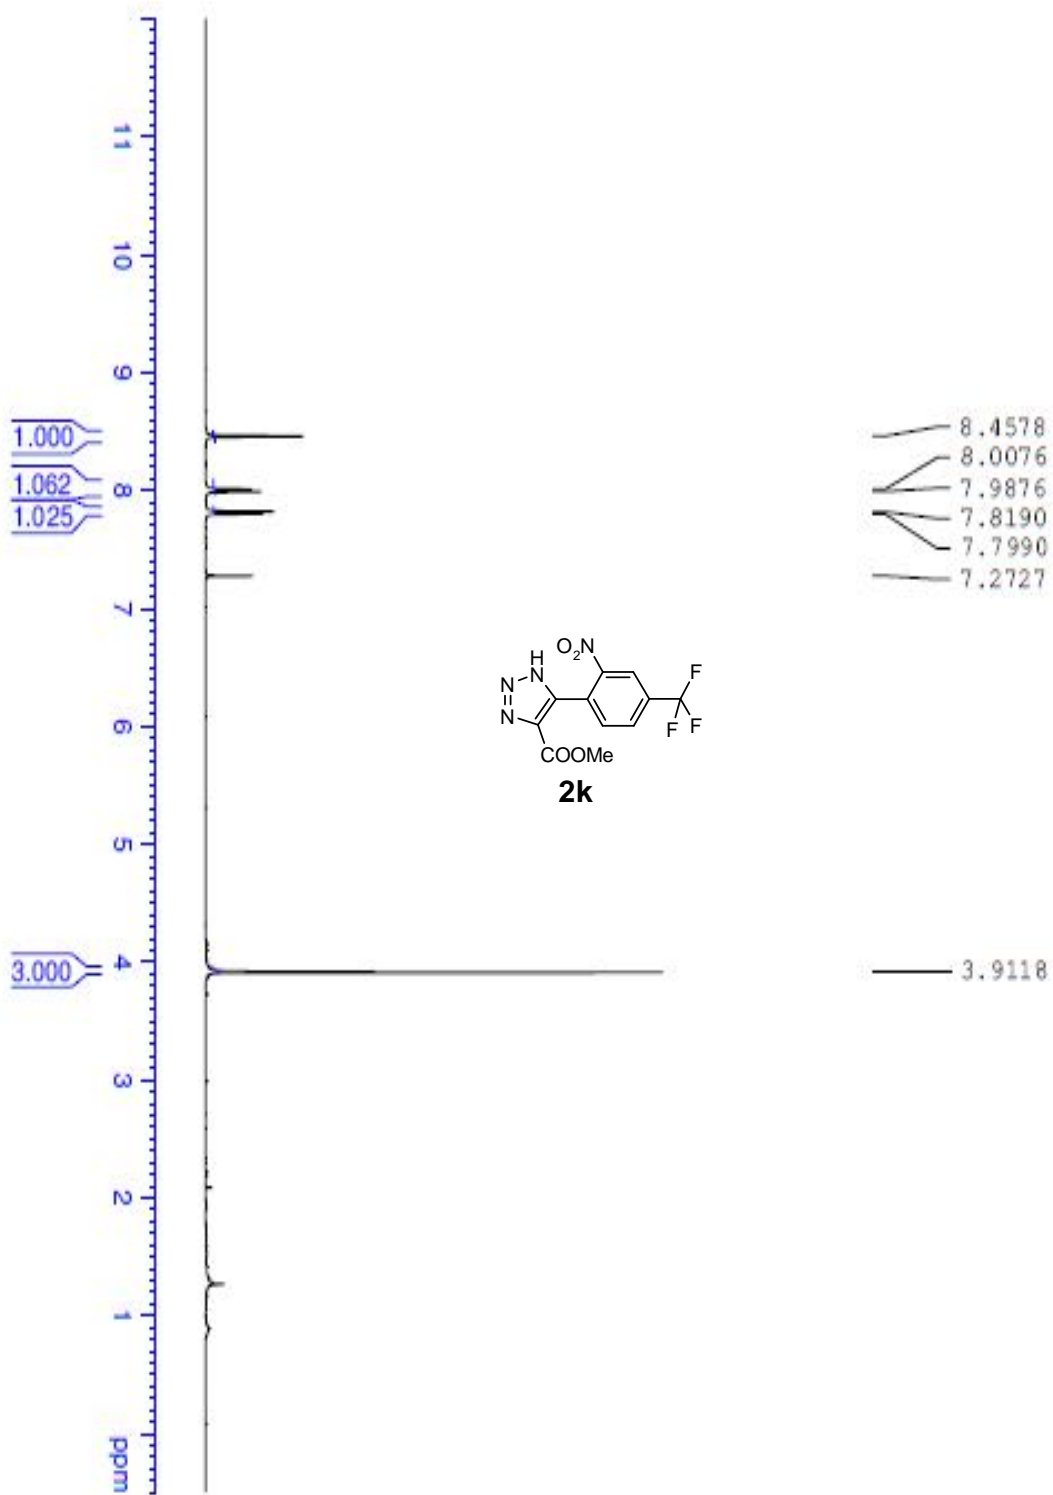

$^1\text{H NMR}$  (400 MHz) in  $\text{CDCl}_3$  (**2k**)

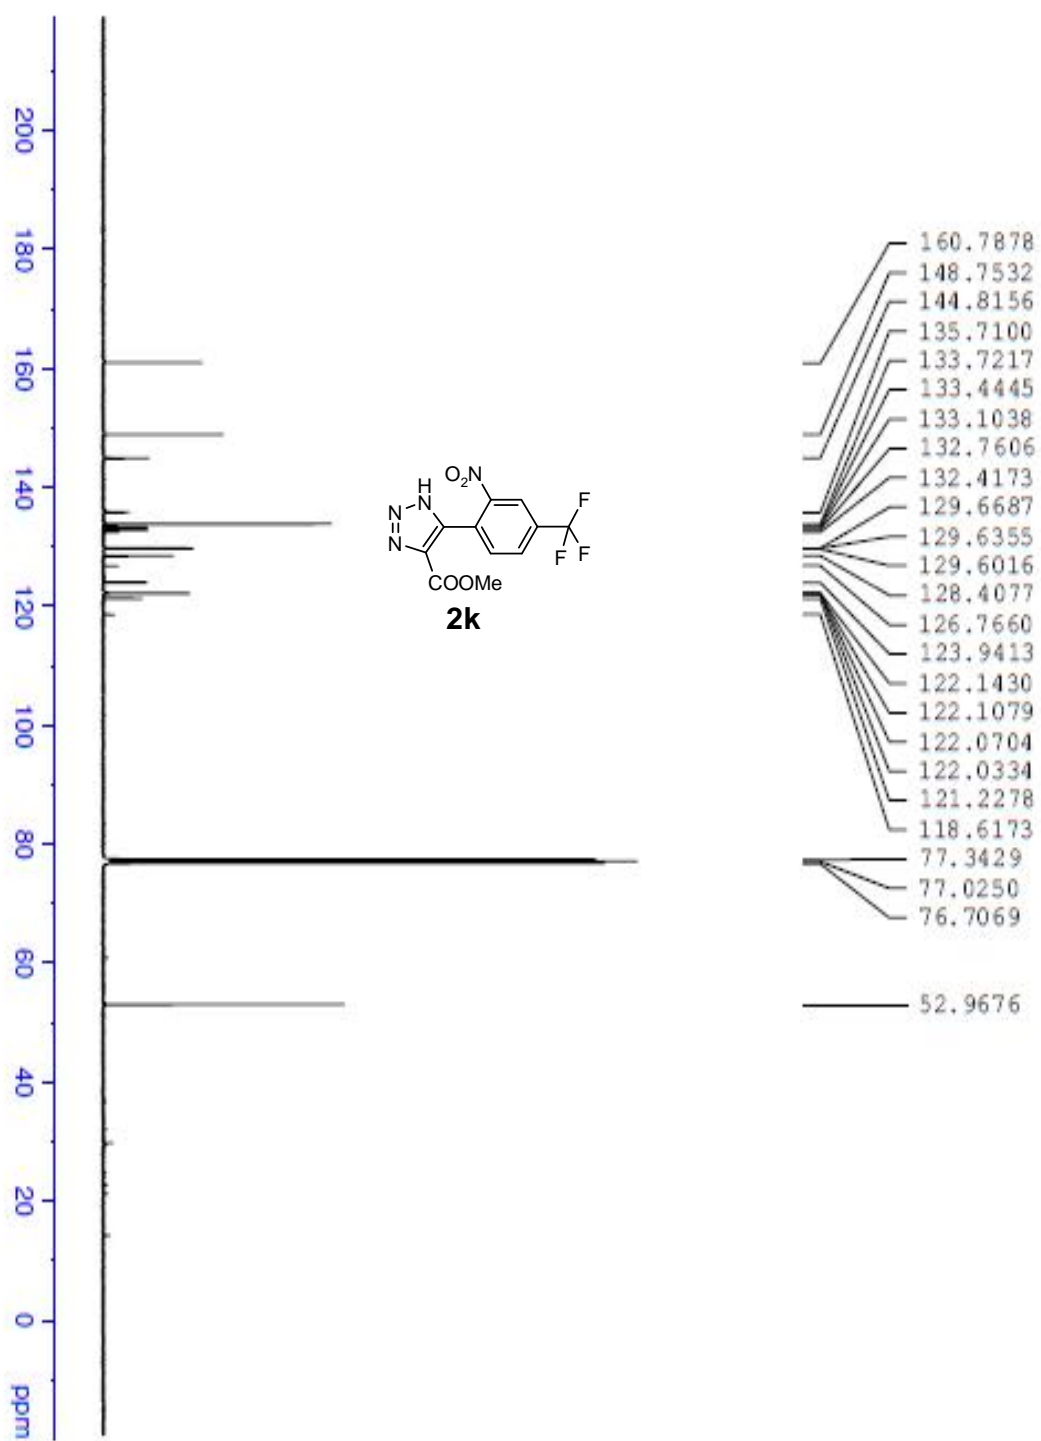

<sup>13</sup>C NMR (100 MHz) in CDCl<sub>3</sub> (**2k**)

Method info : B: 10mM NH4HCO3 , C: ACN ; Flow Rate:1.0 ml/min  
 COLUMN:XBridge C8 (50x4.6mm, 3.5μ), -ve mode

TIME %C  
 0 05  
 8.0 100  
 8.1 100  
 8.5 05  
 10.0 05

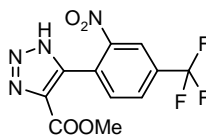

**2k**

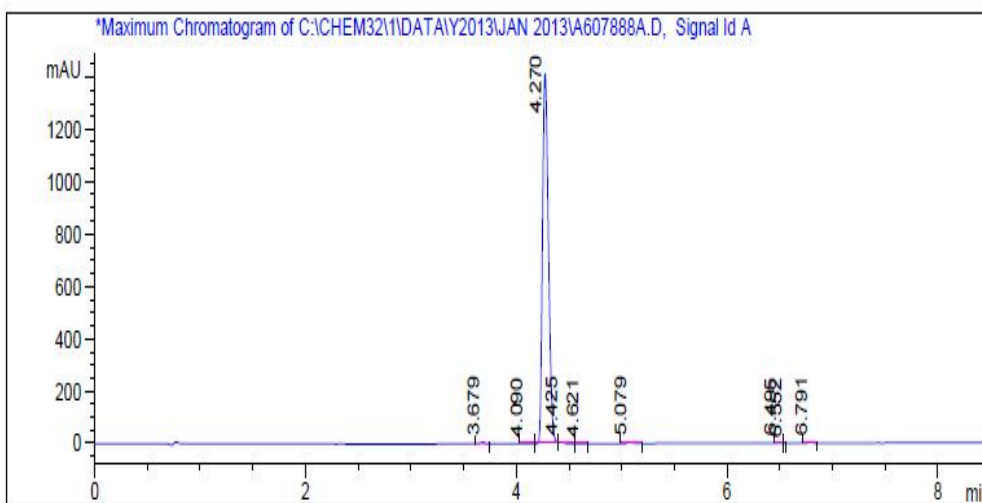

| Peak No | RT min | Area       | Area % |
|---------|--------|------------|--------|
| 1       | 3.679  | 1.341e+001 | 0.240  |
| 2       | 4.090  | 2.727e+000 | 0.049  |
| 3       | 4.270  | 5.522e+003 | 98.723 |
| 4       | 4.425  | 2.179e+001 | 0.390  |
| 5       | 4.621  | 3.663e+000 | 0.065  |
| 6       | 5.079  | 1.611e+001 | 0.288  |
| 7       | 6.495  | 3.362e+000 | 0.060  |
| 8       | 6.552  | 4.135e-001 | 0.007  |
| 9       | 6.791  | 9.950e+000 | 0.178  |

HPLC (2k)

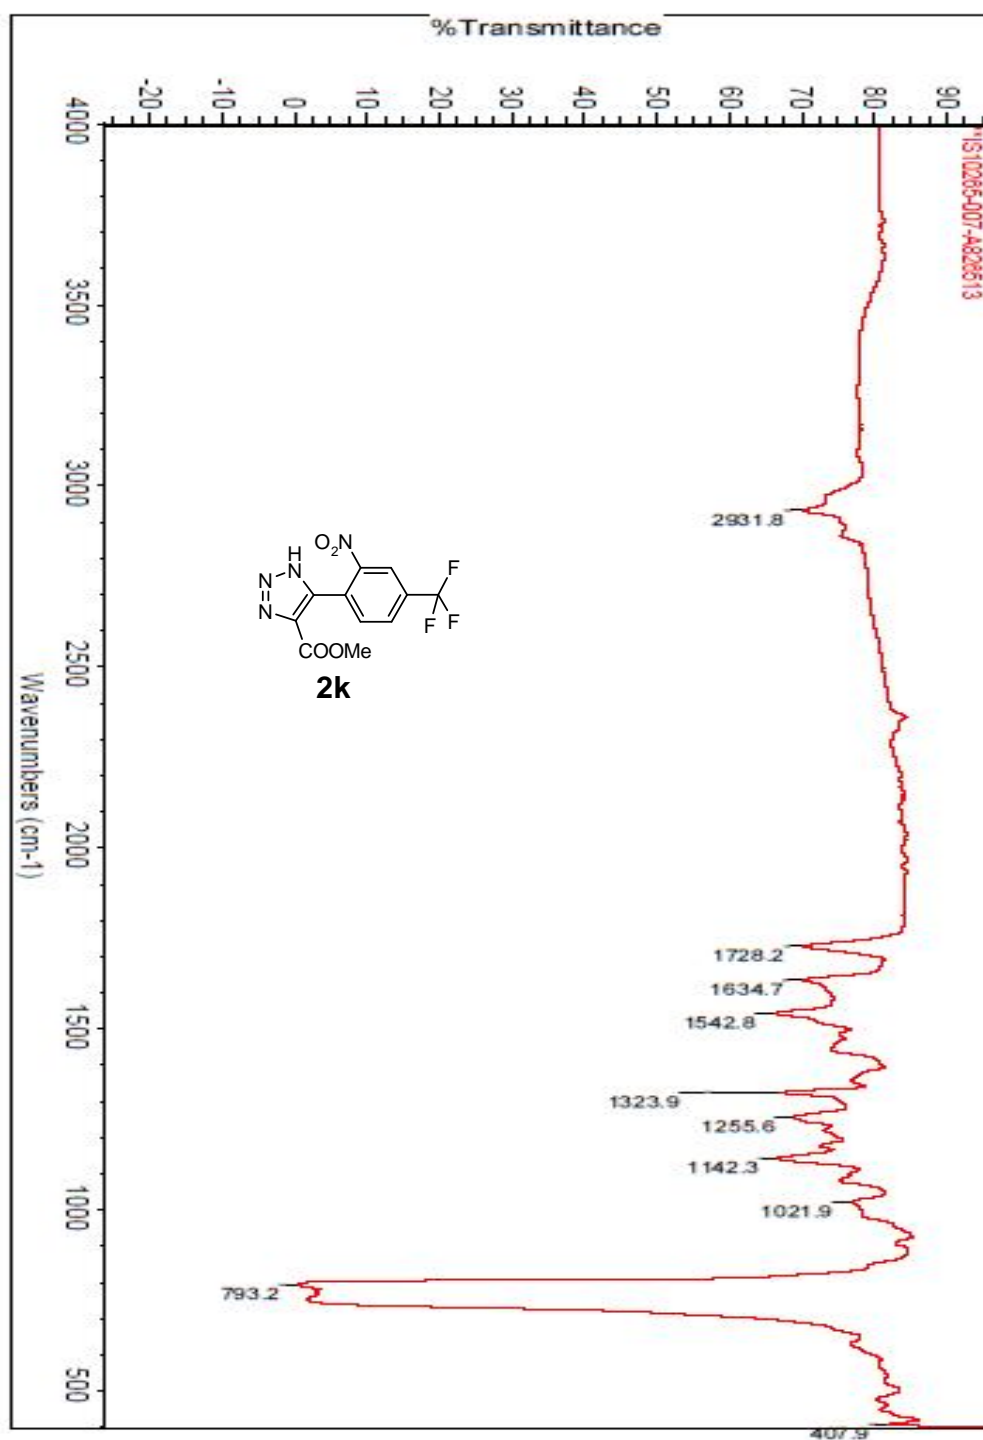

IR (2k)

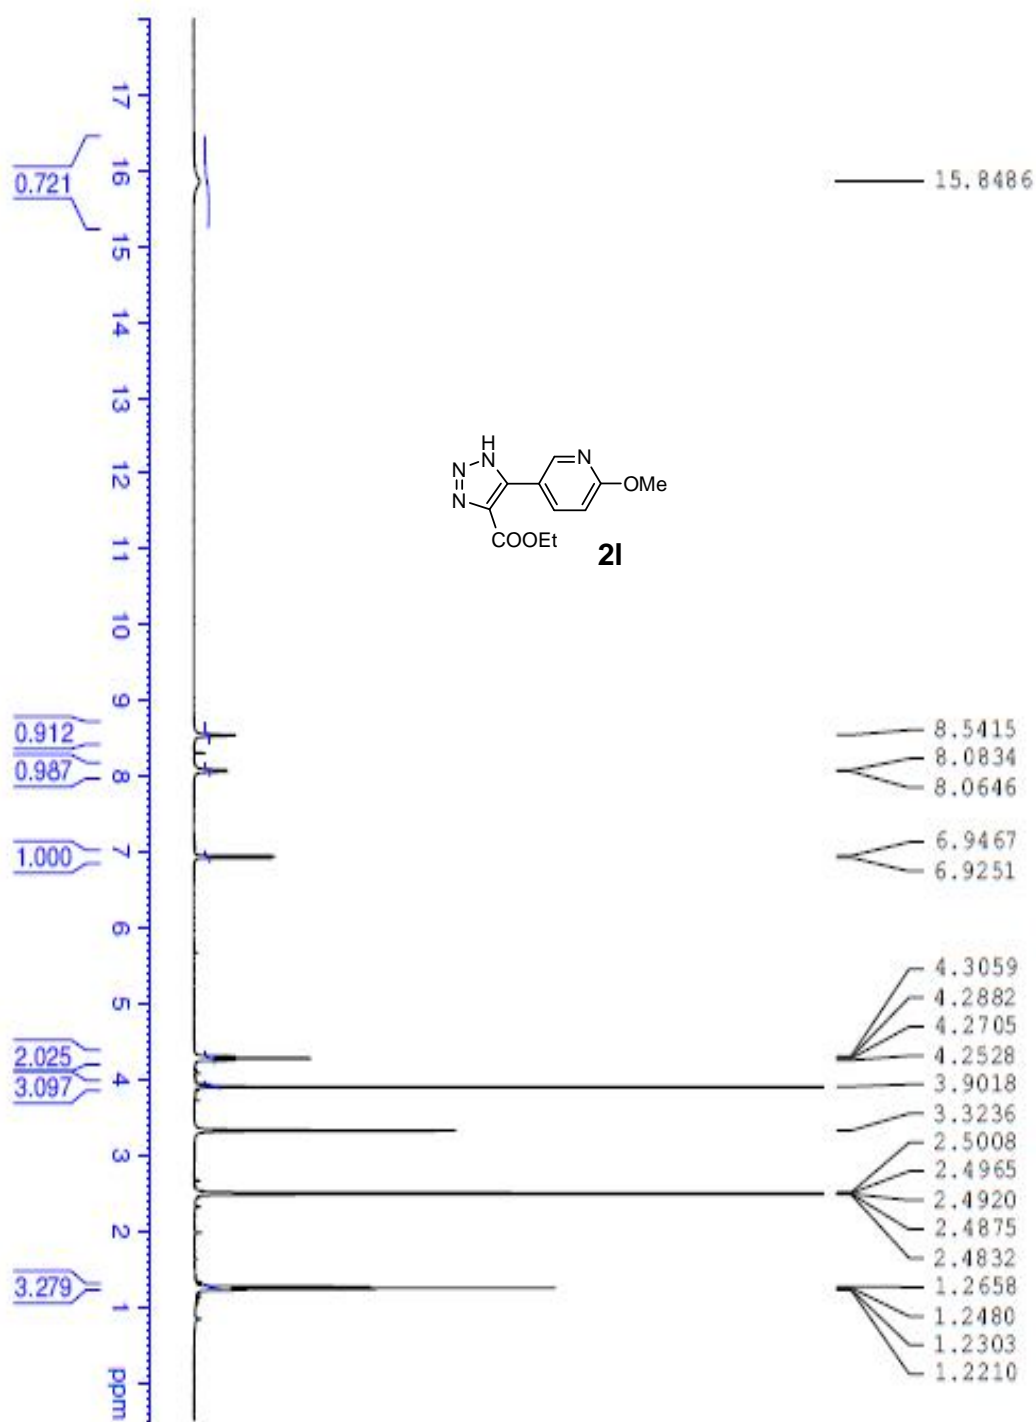

<sup>1</sup>H NMR (400 MHz) in DMSO-*d*<sub>6</sub> (21)

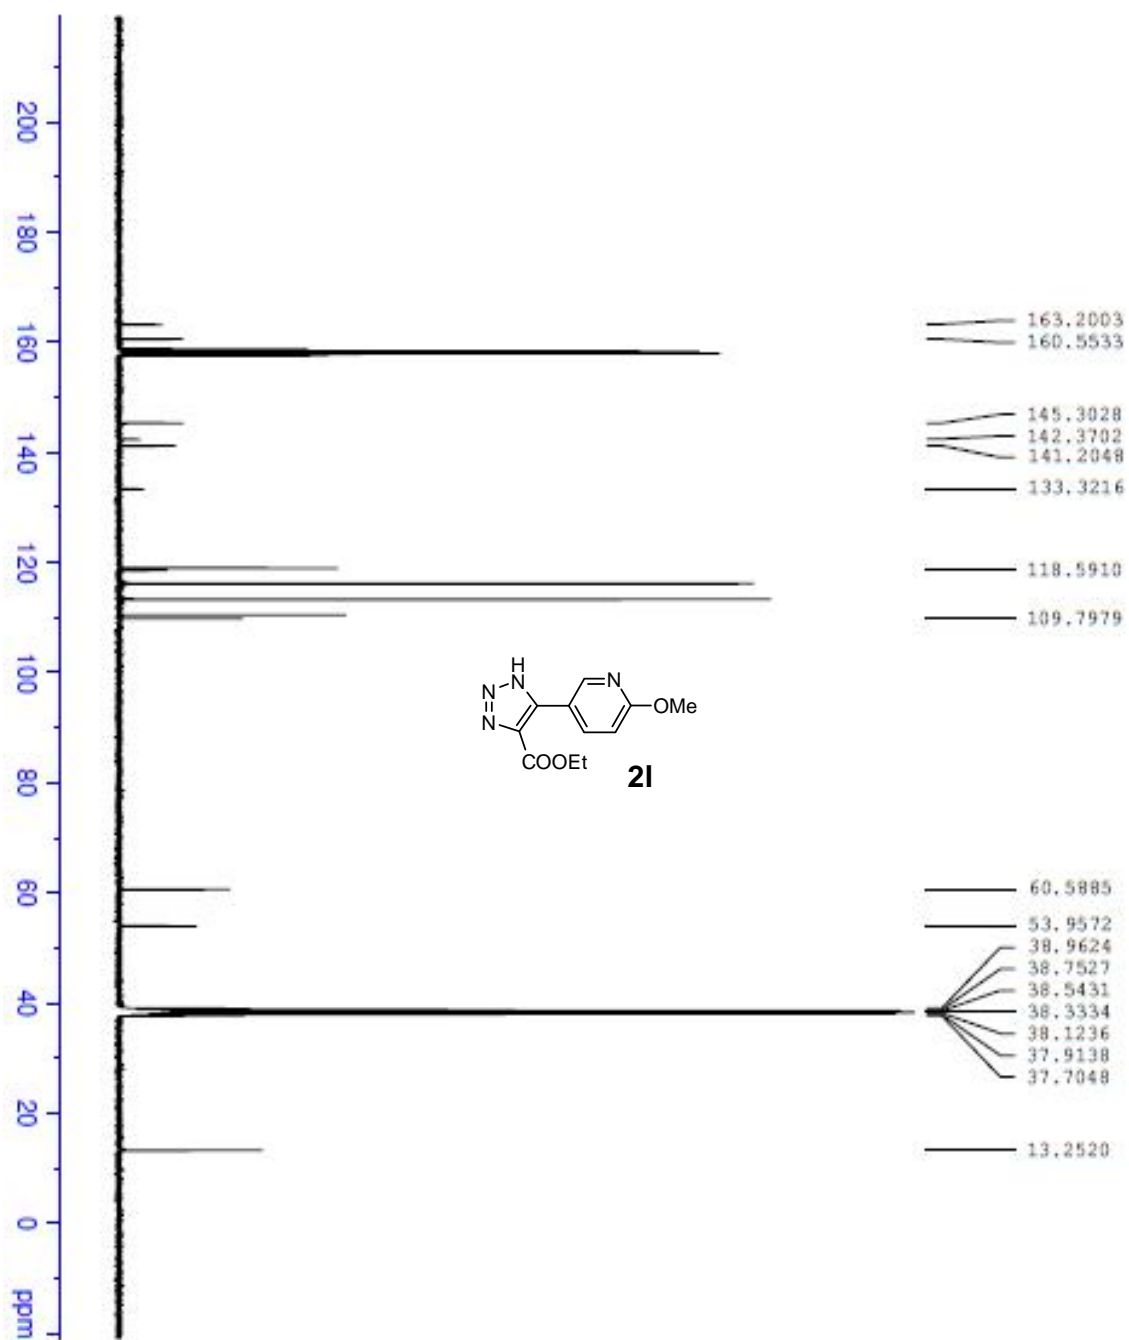

<sup>13</sup>C NMR (100 MHz) in DMSO-*d*<sub>6</sub> (**2l**)

Method info :

A-10mM NH<sub>4</sub>HCO<sub>3</sub> IN H<sub>2</sub>O , B- ACN Flow: 1.0 ml/min  
COLUMN: XBridge C8 (50X4.6mm, 3.5µm), +ve mode

| TIME | %B  |
|------|-----|
| 0    | 05  |
| 8.0  | 100 |
| 8.1  | 100 |
| 8.5  | 05  |
| 10   | 05  |

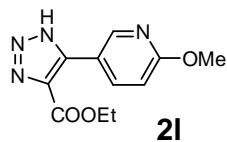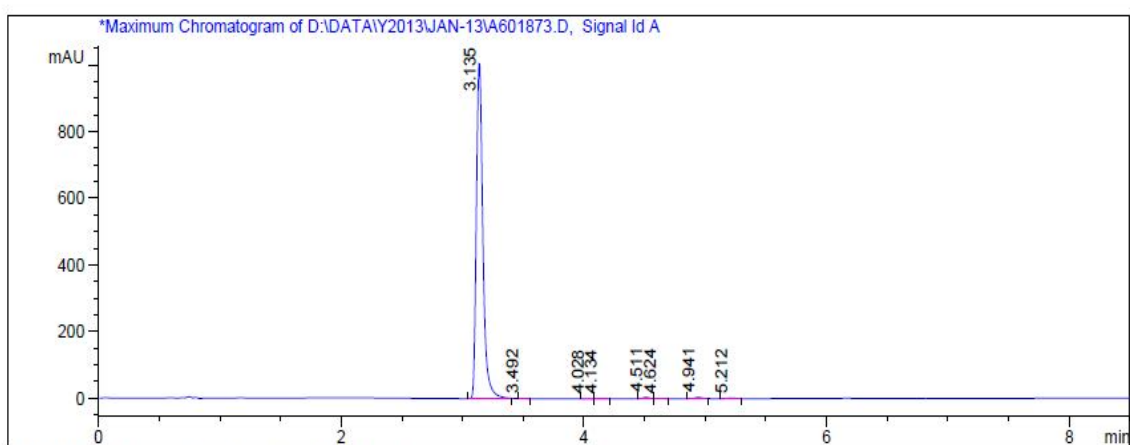

| Peak No | RT min | Area        | Area % |
|---------|--------|-------------|--------|
| 1       | 3.135  | 13.775e+003 | 97.769 |
| 2       | 3.492  | 14.428e+000 | 0.115  |
| 3       | 4.028  | 16.973e+000 | 0.181  |
| 4       | 4.134  | 11.052e+001 | 0.273  |
| 5       | 4.511  | 12.093e+001 | 0.542  |
| 6       | 4.624  | 11.029e+001 | 0.266  |
| 7       | 4.941  | 11.760e+001 | 0.456  |
| 8       | 5.212  | 11.539e+001 | 0.399  |

HPLC (21)



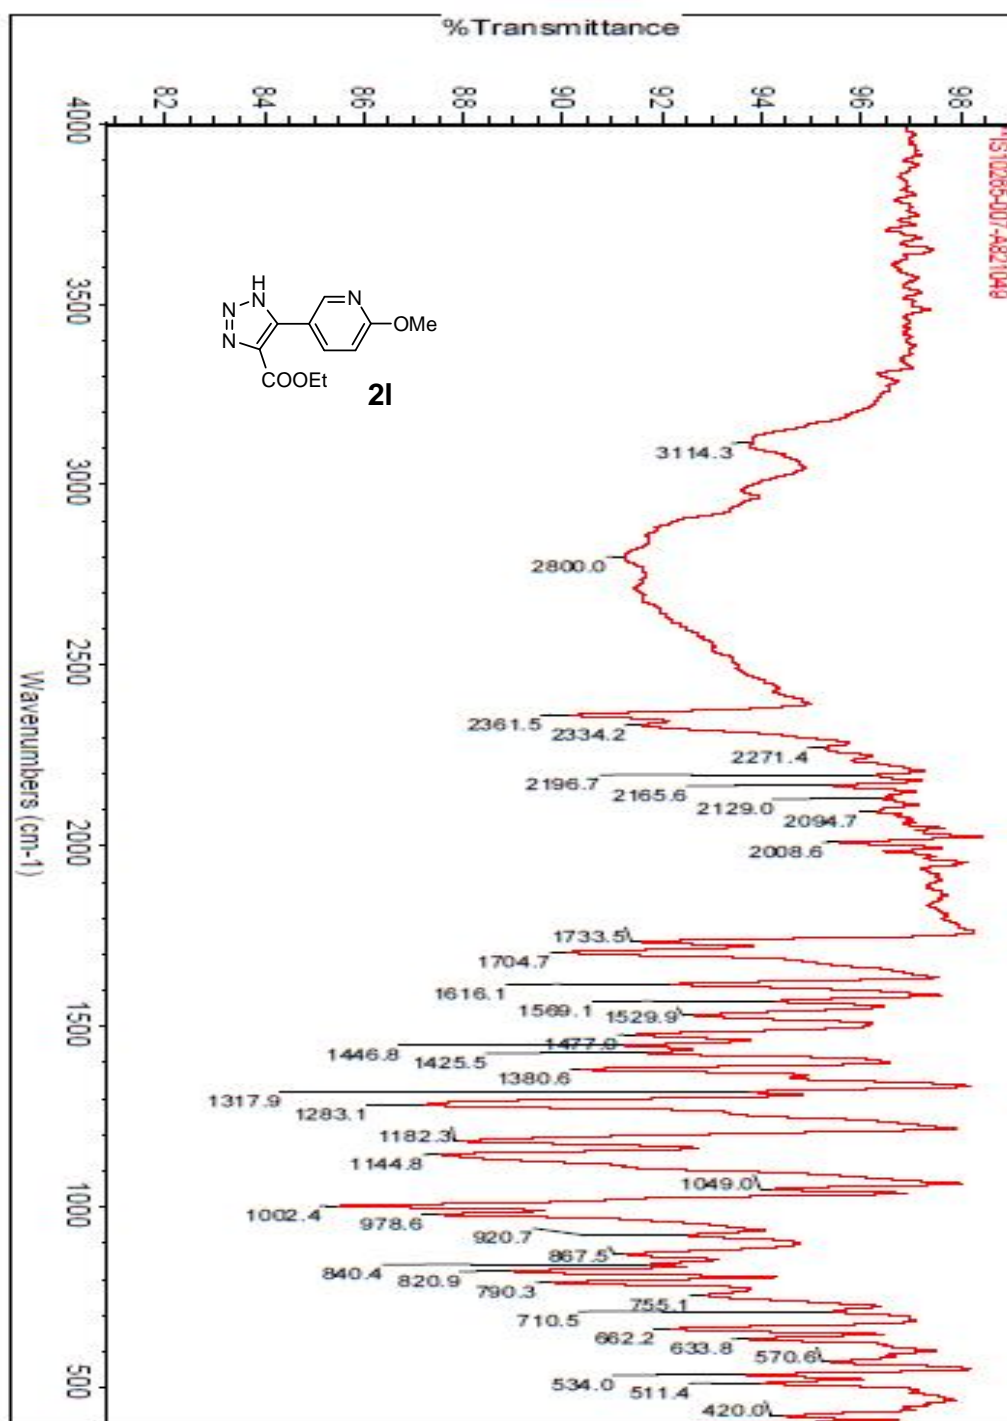

IR (21)

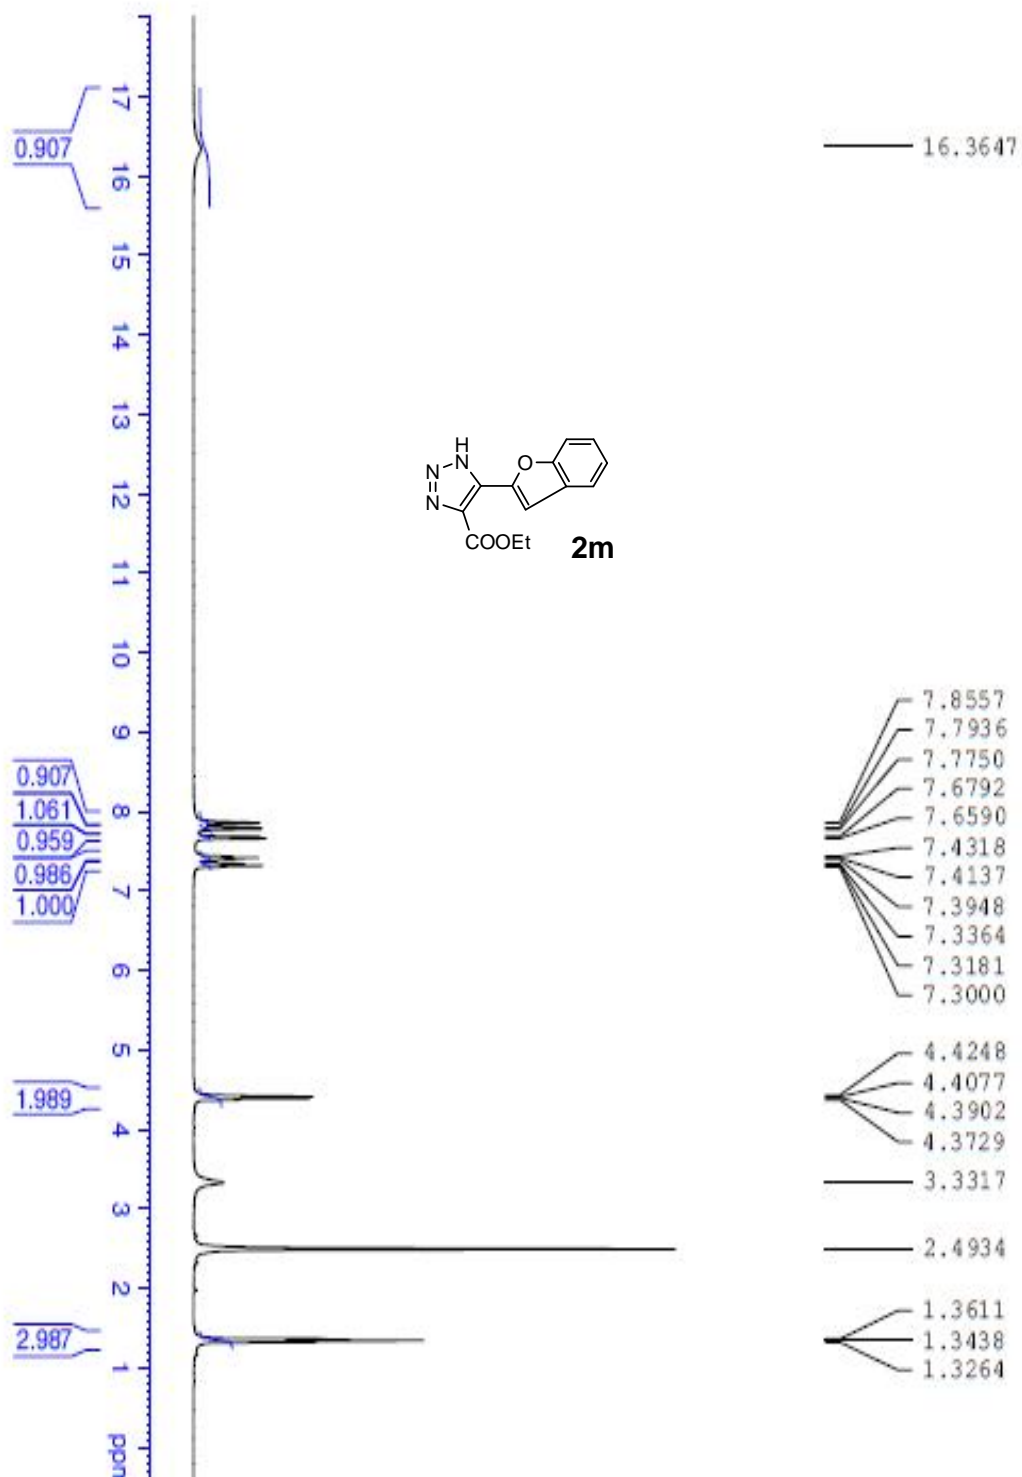

<sup>1</sup>H NMR (400 MHz) in DMSO-*d*<sub>6</sub> (**2m**)

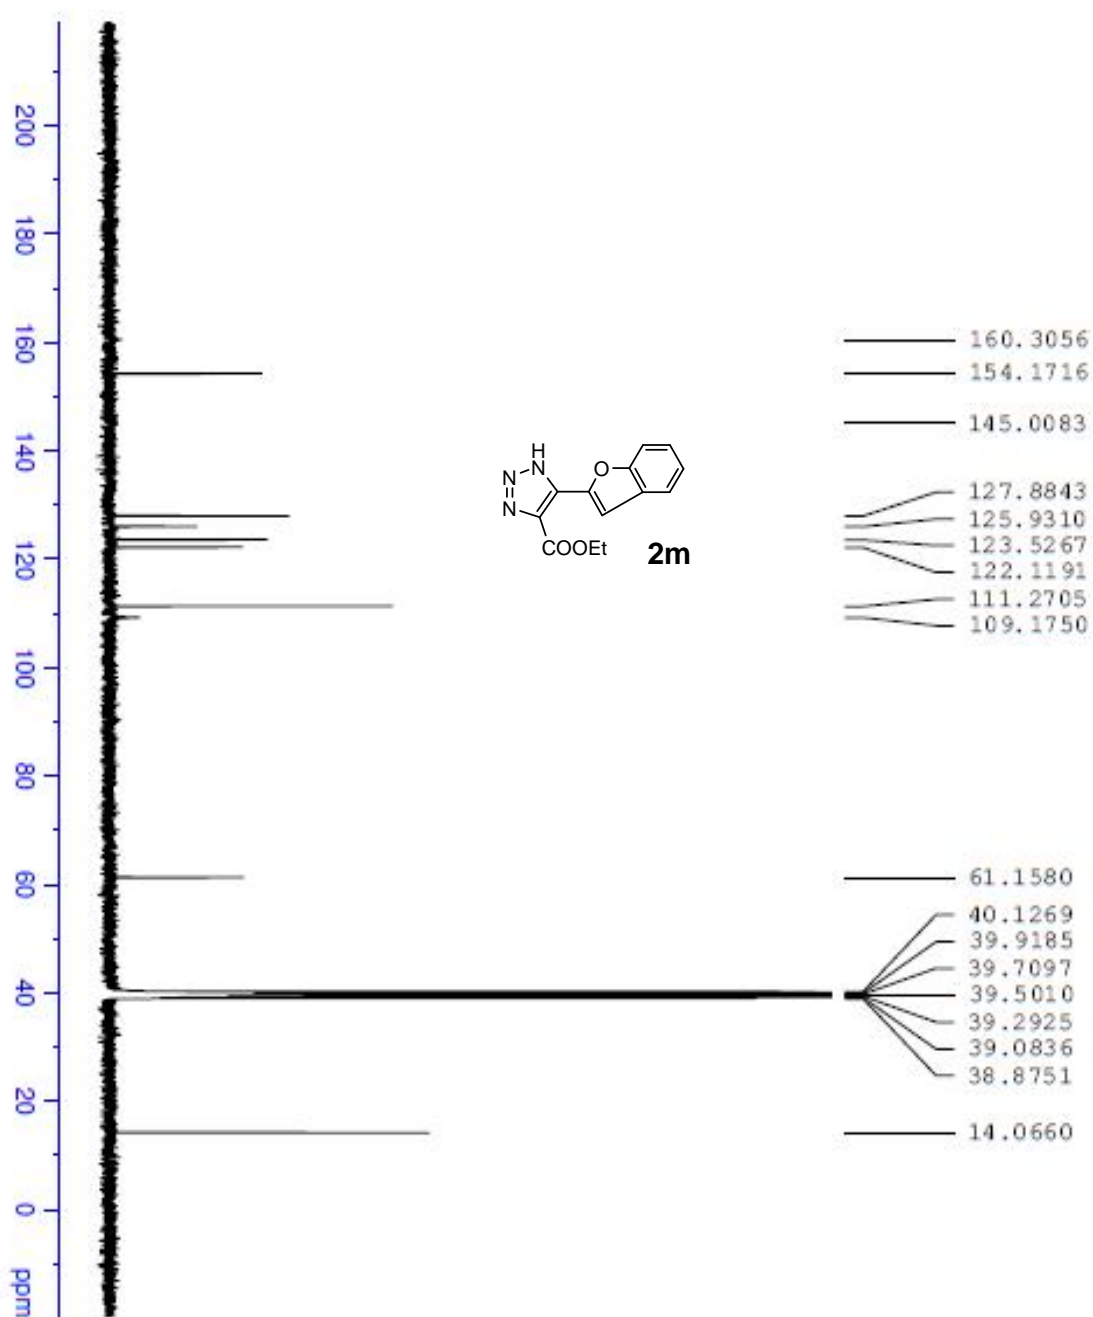

$^{13}\text{C}$  NMR (100 MHz) in  $\text{DMSO-}d_6$  (**2m**)

Method info : A : 0.1%TFA IN H2O B: 0.1%TFA IN ACN Flow = 2.0 mL/min  
 COLUMN:XBridge C8 (50X4.6)mm,3.5µm , +ve mode

| Time | % of B |
|------|--------|
| 0    | 5      |
| 8.0  | 100    |
| 8.1  | 100    |
| 8.5  | 5      |
| 10.0 | 5      |

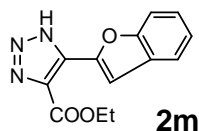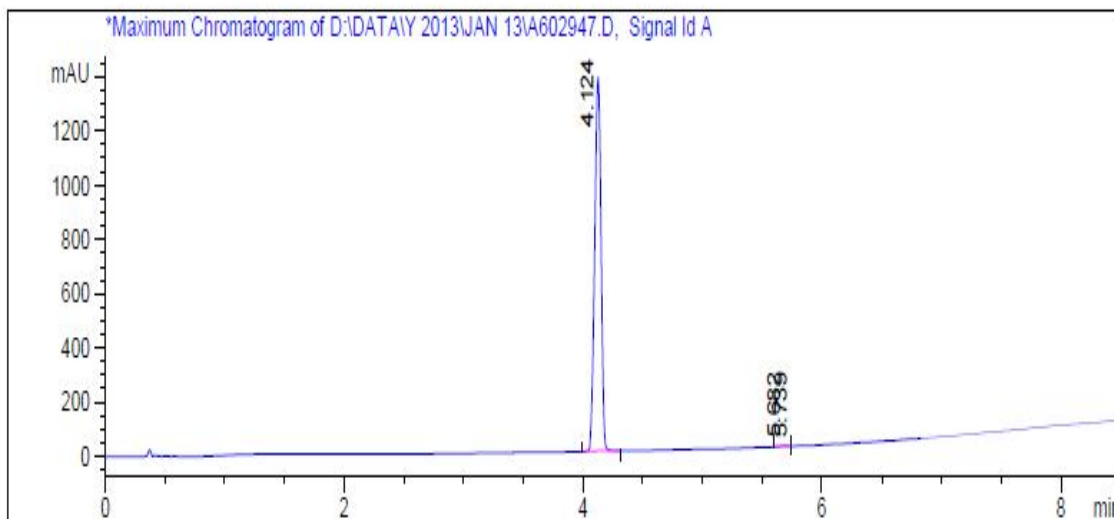

| Peak No | RT min | Area       | Area % |
|---------|--------|------------|--------|
| 1       | 4.124  | 5.043e+003 | 99.830 |
| 2       | 5.682  | 8.387e+000 | 0.166  |
| 3       | 5.739  | 1.756e-001 | 0.003  |

HPLC (2m)

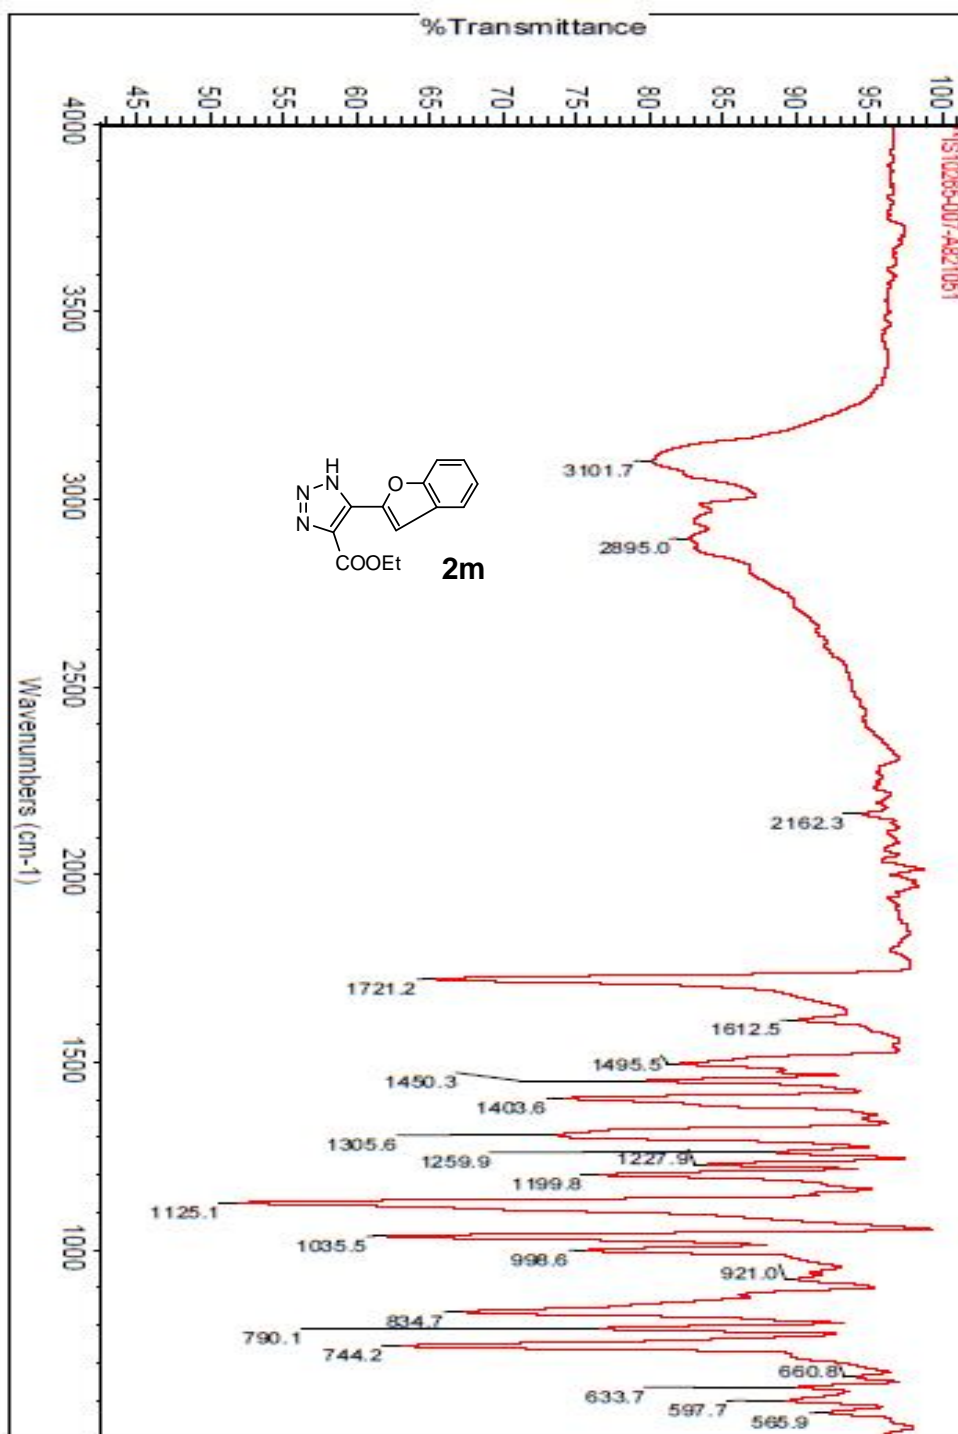

IR (2m)

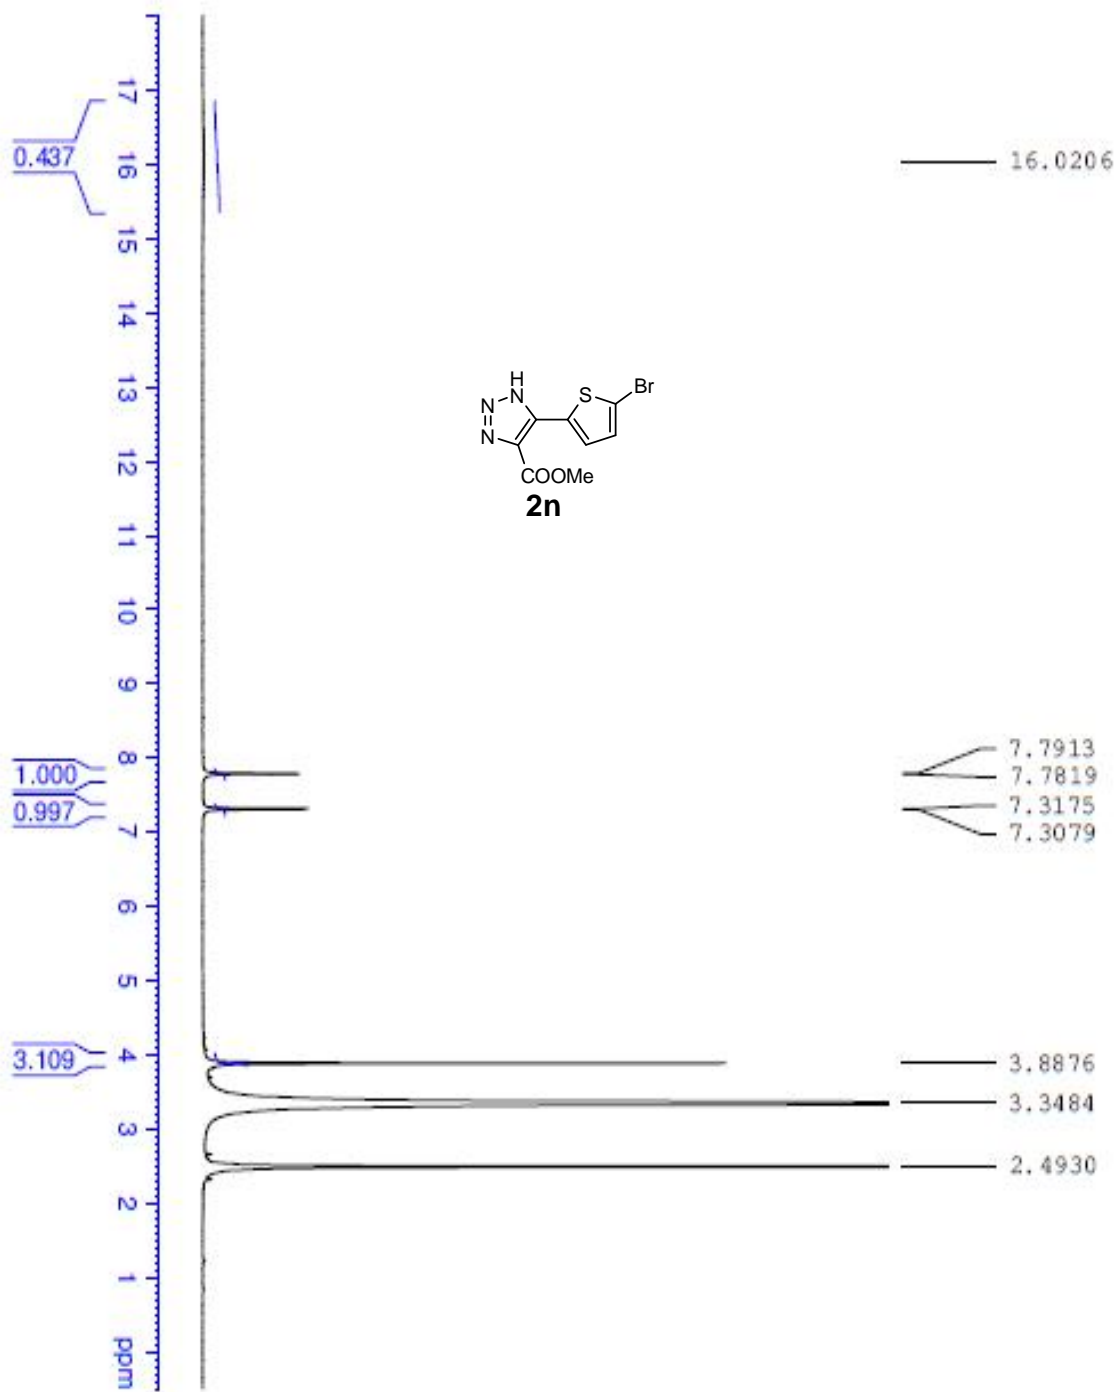

<sup>1</sup>H NMR (400 MHz) in DMSO-*d*<sub>6</sub> (**2n**)

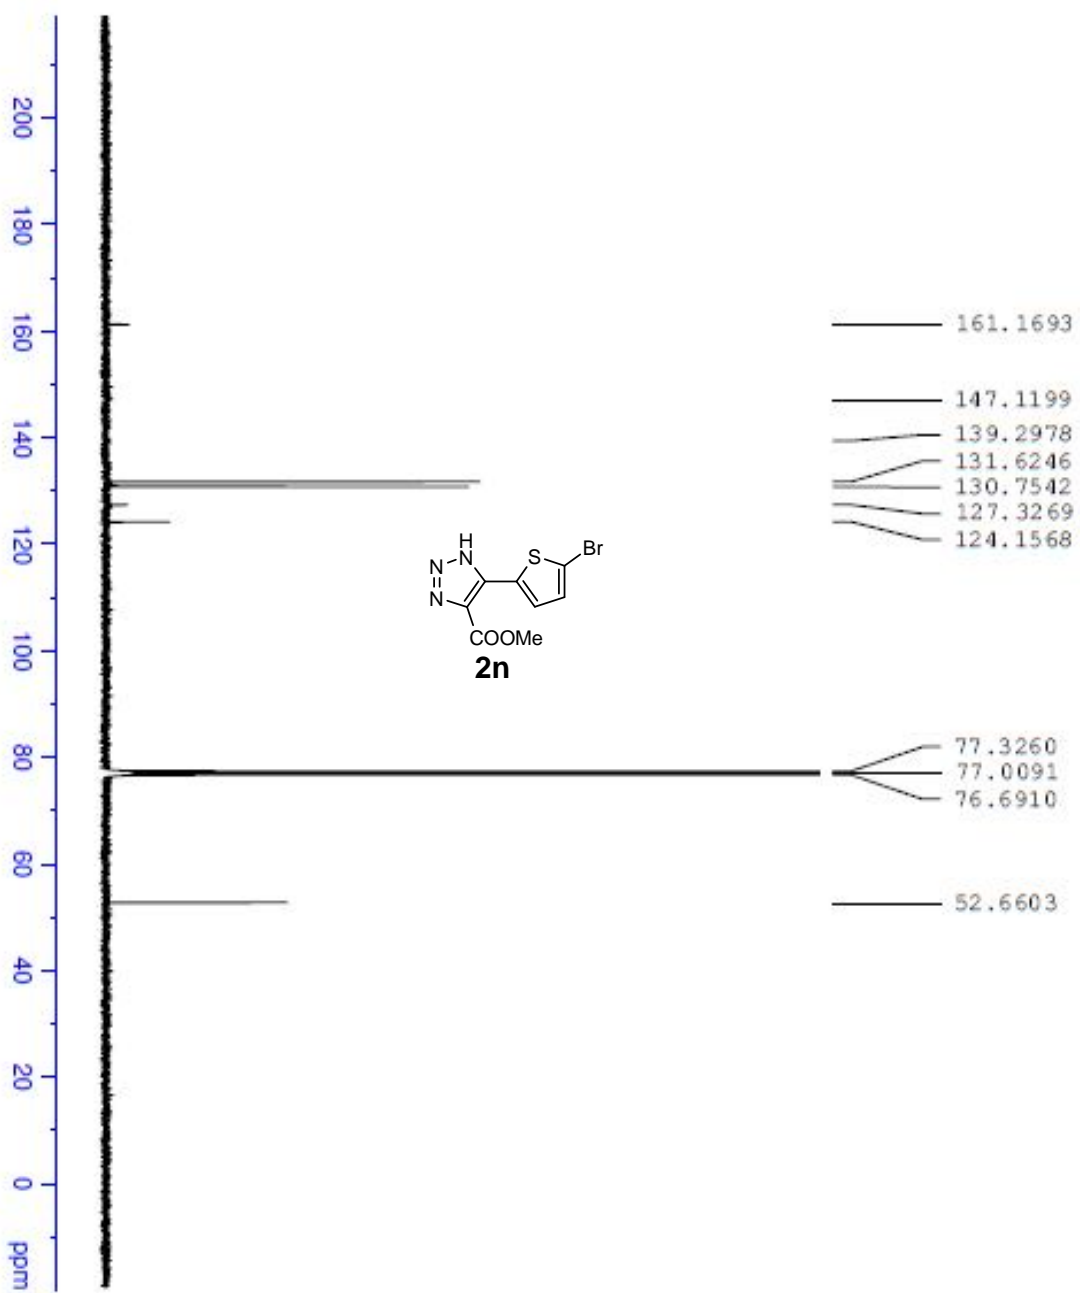

$^{13}\text{C}$  NMR (100 MHz) in  $\text{DMSO-}d_6$  (**2n**)

Method info :

A-10mM NH<sub>4</sub>HCO<sub>3</sub> IN H<sub>2</sub>O , B- ACN Flow: 1.0 ml/min  
COLUMN: XBridge C8 (50X4.6mm, 3.5µm), -ve mode

| TIME | %B  |
|------|-----|
| 0    | 05  |
| 8.0  | 100 |
| 8.1  | 100 |
| 8.5  | 05  |
| 10   | 05  |

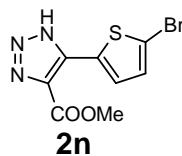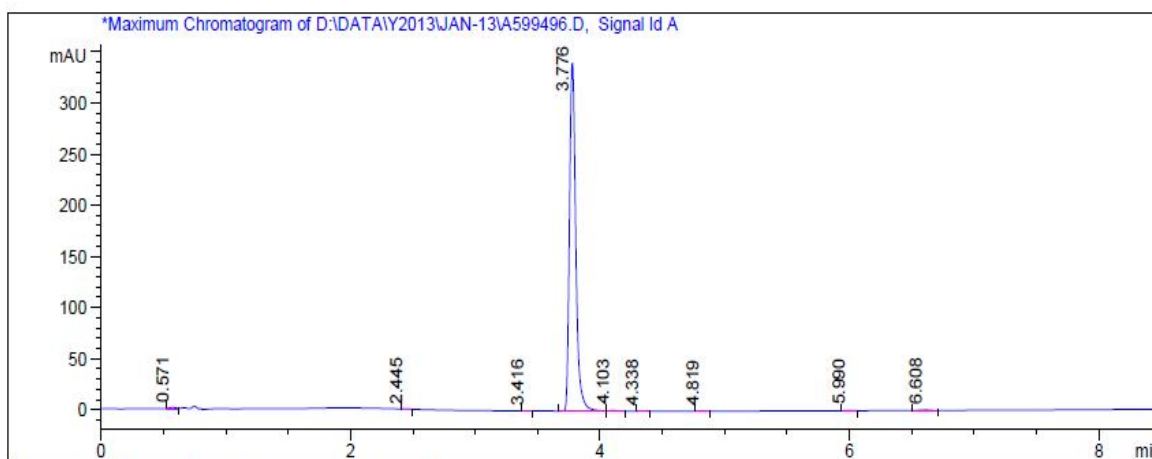

| Peak No | RT min | Area       | Area % |
|---------|--------|------------|--------|
| 1       | 0.571  | 4.722e+000 | 0.389  |
| 2       | 2.445  | 6.176e-001 | 0.051  |
| 3       | 3.416  | 2.909e-001 | 0.024  |
| 4       | 3.776  | 1.197e+003 | 98.729 |
| 5       | 4.103  | 2.774e+000 | 0.229  |
| 6       | 4.338  | 1.621e+000 | 0.134  |
| 7       | 4.819  | 5.845e-001 | 0.048  |
| 8       | 5.990  | 1.409e+000 | 0.116  |
| 9       | 6.608  | 3.394e+000 | 0.280  |

HPLC (2n)



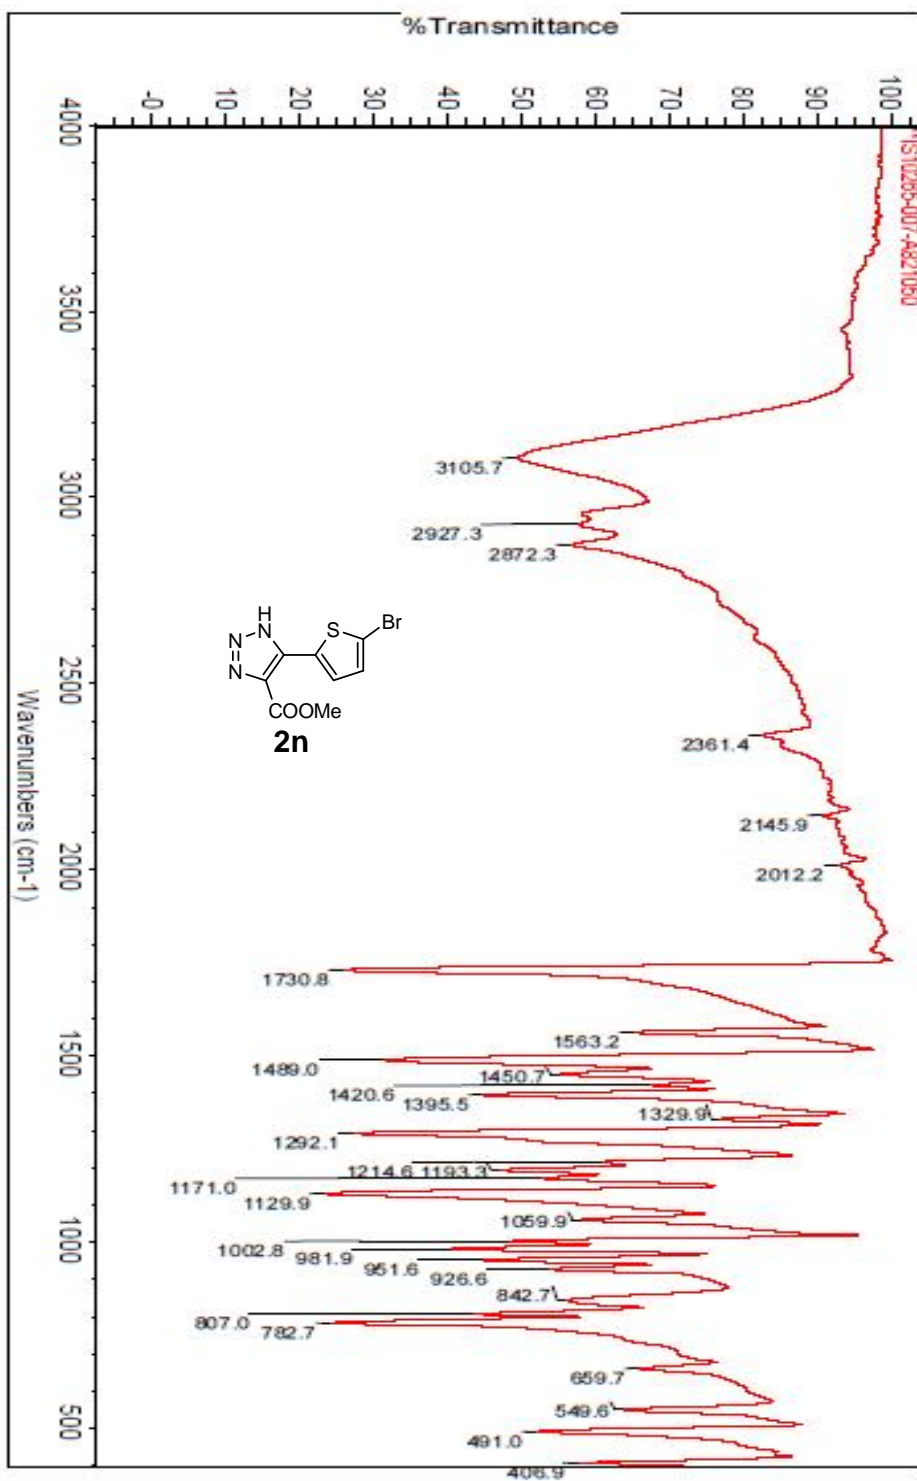

IR (**2n**)

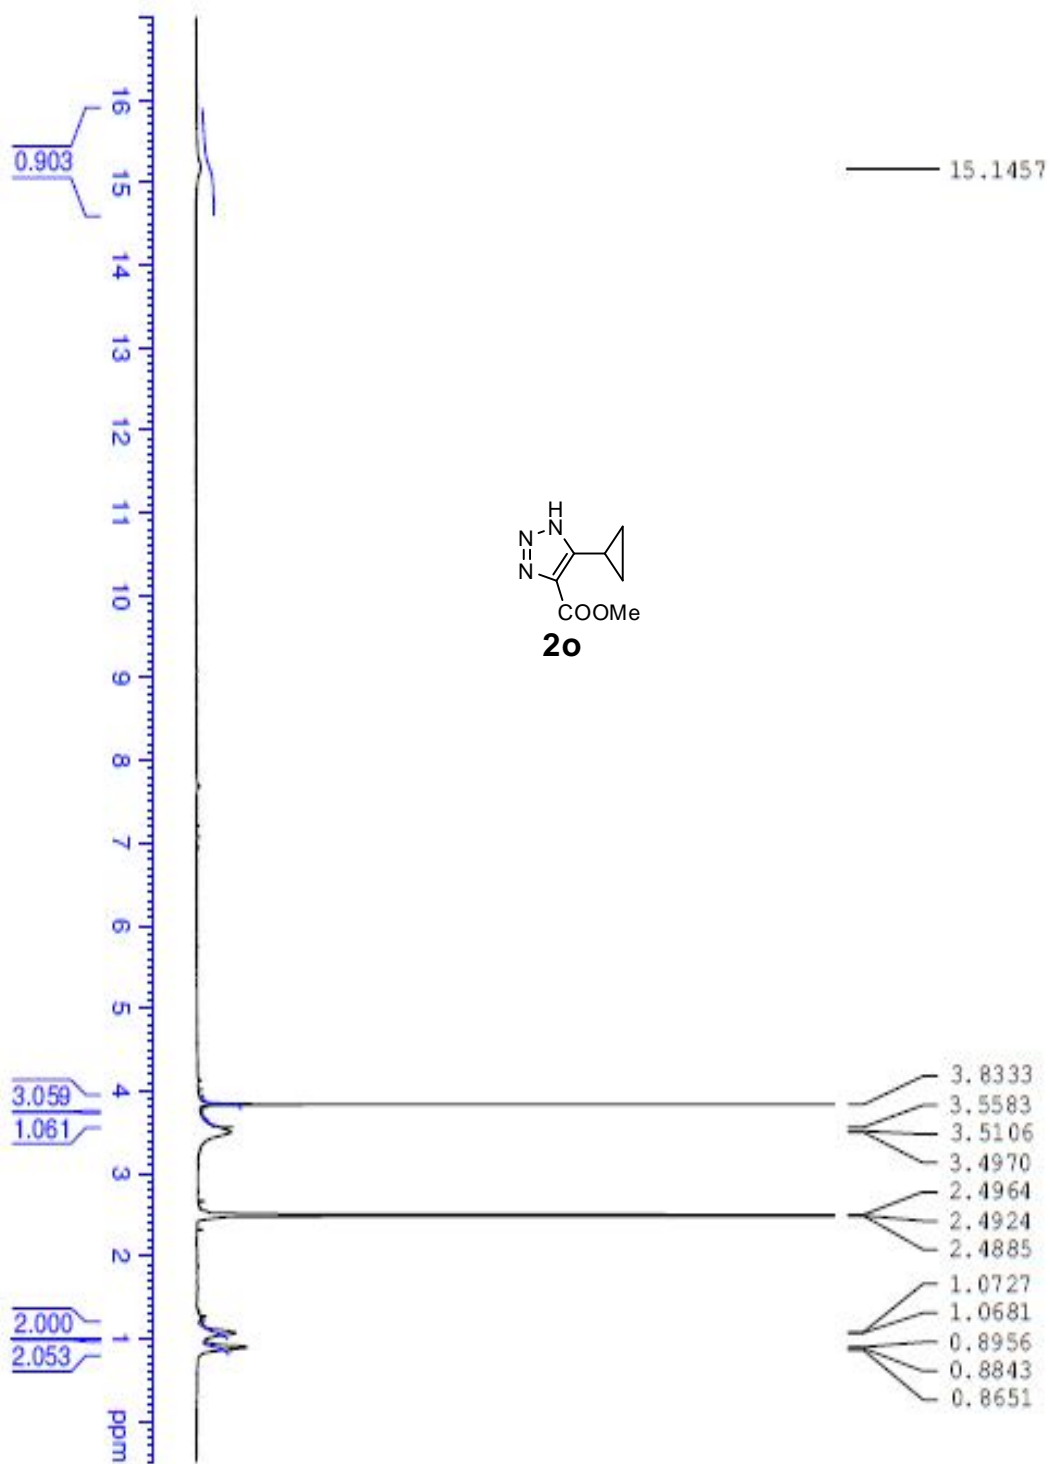

<sup>1</sup>H NMR (400 MHz) in DMSO-*d*<sub>6</sub> (**20**)

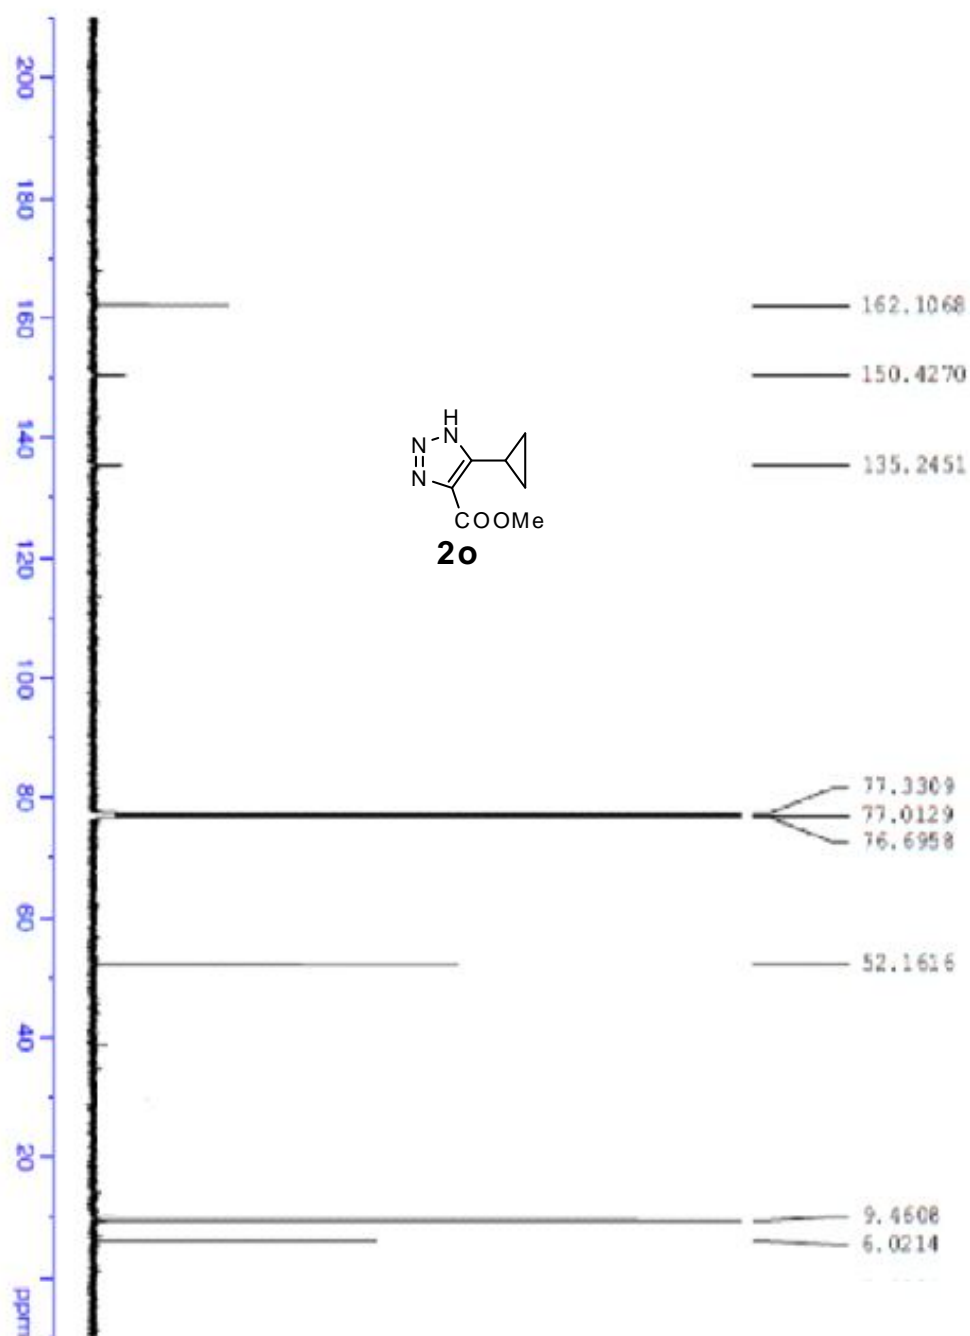

<sup>13</sup>C NMR (100 MHz) in CDCl<sub>3</sub> (**2o**)

Method info : A:0.1%TFA in H2O, B:0.1%TFA in ACN, Flow Rate:2.0ml/min  
 COLUMN: XBridge C8 (50X4.6)mm,3.5µm

| Time | % of B |
|------|--------|
| 0    | 5      |
| 8.0  | 100    |
| 8.1  | 100    |
| 8.5  | 5      |
| 10.0 | 5      |

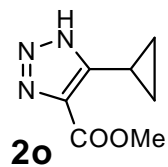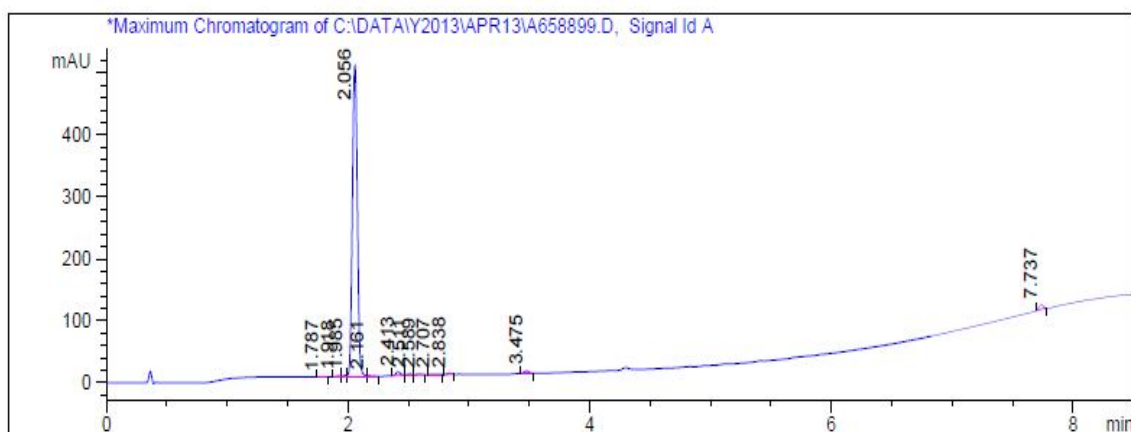

| Peak No | RT min | Area       | Area % |
|---------|--------|------------|--------|
| 1       | 1.787  | 1.368e+000 | 0.09   |
| 2       | 1.918  | 4.936e+000 | 0.33   |
| 3       | 1.985  | 5.626e+000 | 0.37   |
| 4       | 2.056  | 1.422e+003 | 94.20  |
| 5       | 2.161  | 3.200e+000 | 0.21   |
| 6       | 2.413  | 1.926e+001 | 1.28   |
| 7       | 2.511  | 7.018e+000 | 0.46   |
| 8       | 2.589  | 6.261e+000 | 0.41   |
| 9       | 2.707  | 4.404e+000 | 0.29   |
| 10      | 2.838  | 5.384e+000 | 0.36   |
| 11      | 3.475  | 1.049e+001 | 0.69   |
| 12      | 7.737  | 1.953e+001 | 1.29   |

HPLC (2o)

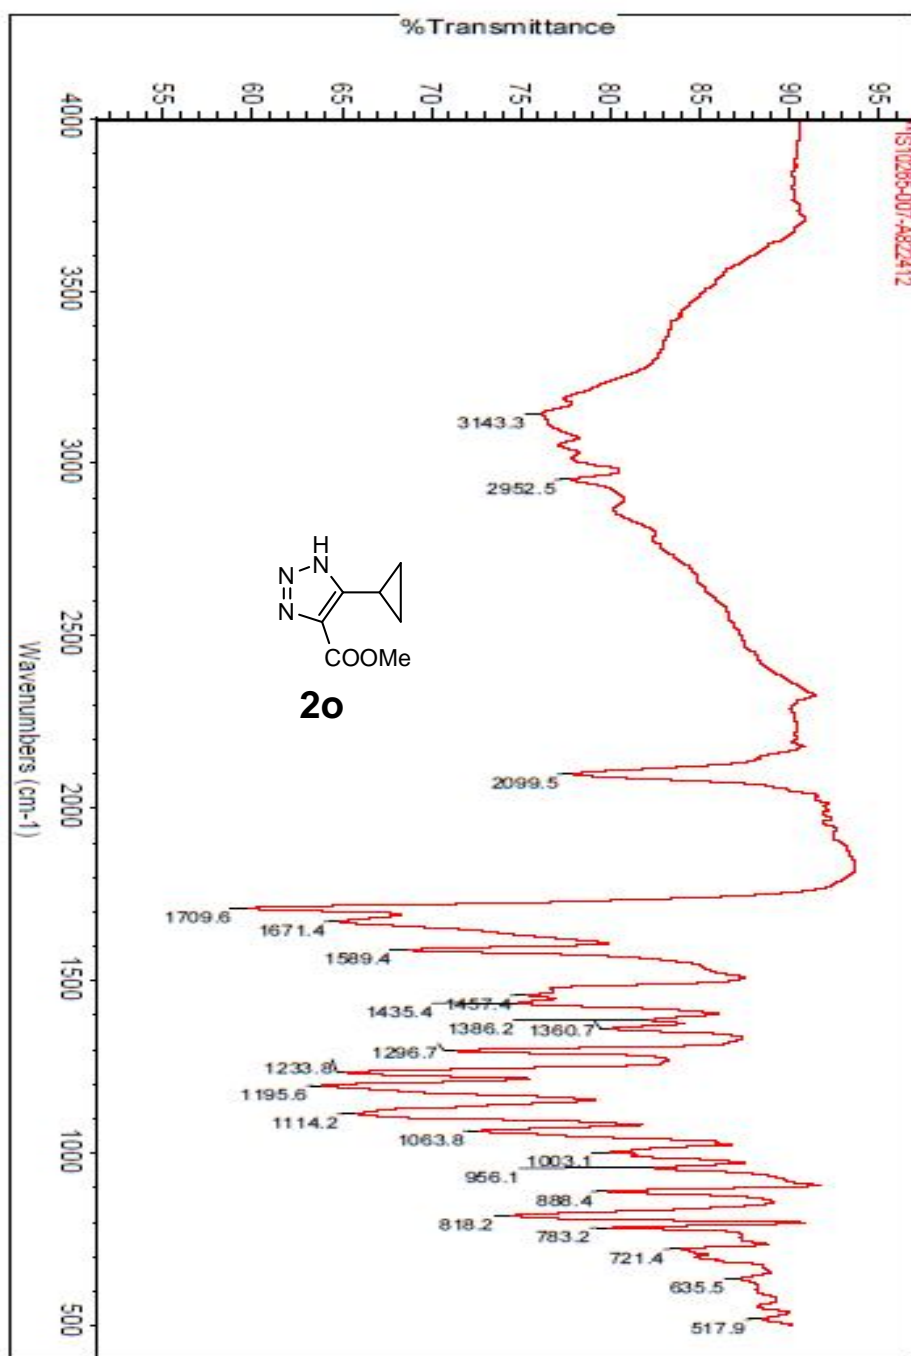

IR (**2o**)

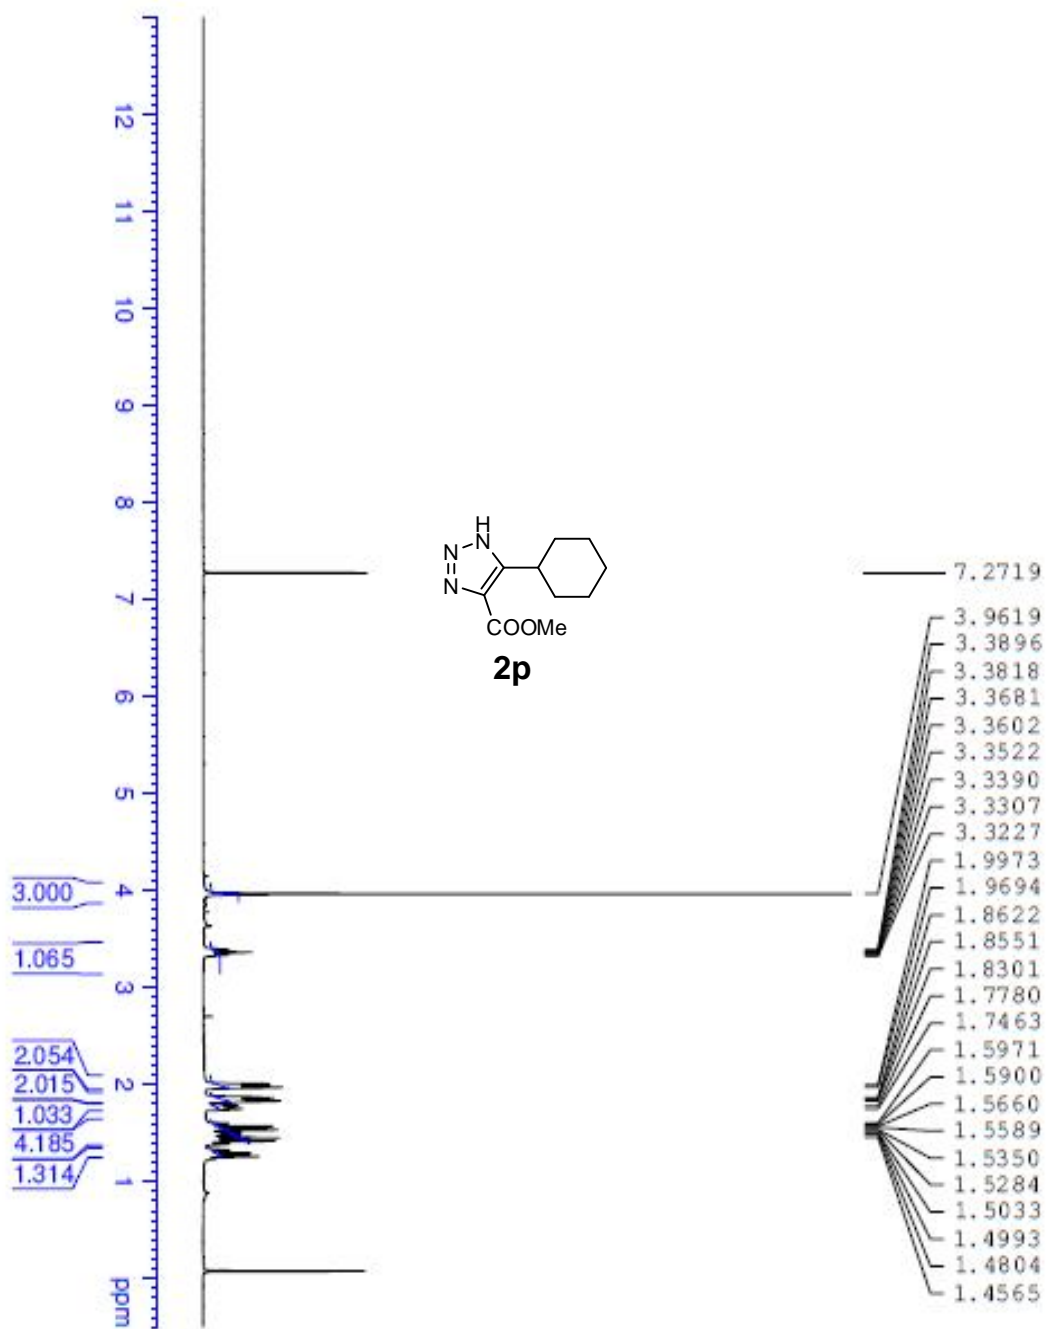

<sup>1</sup>H NMR (400 MHz) in DMSO-*d*<sub>6</sub> (**2p**)

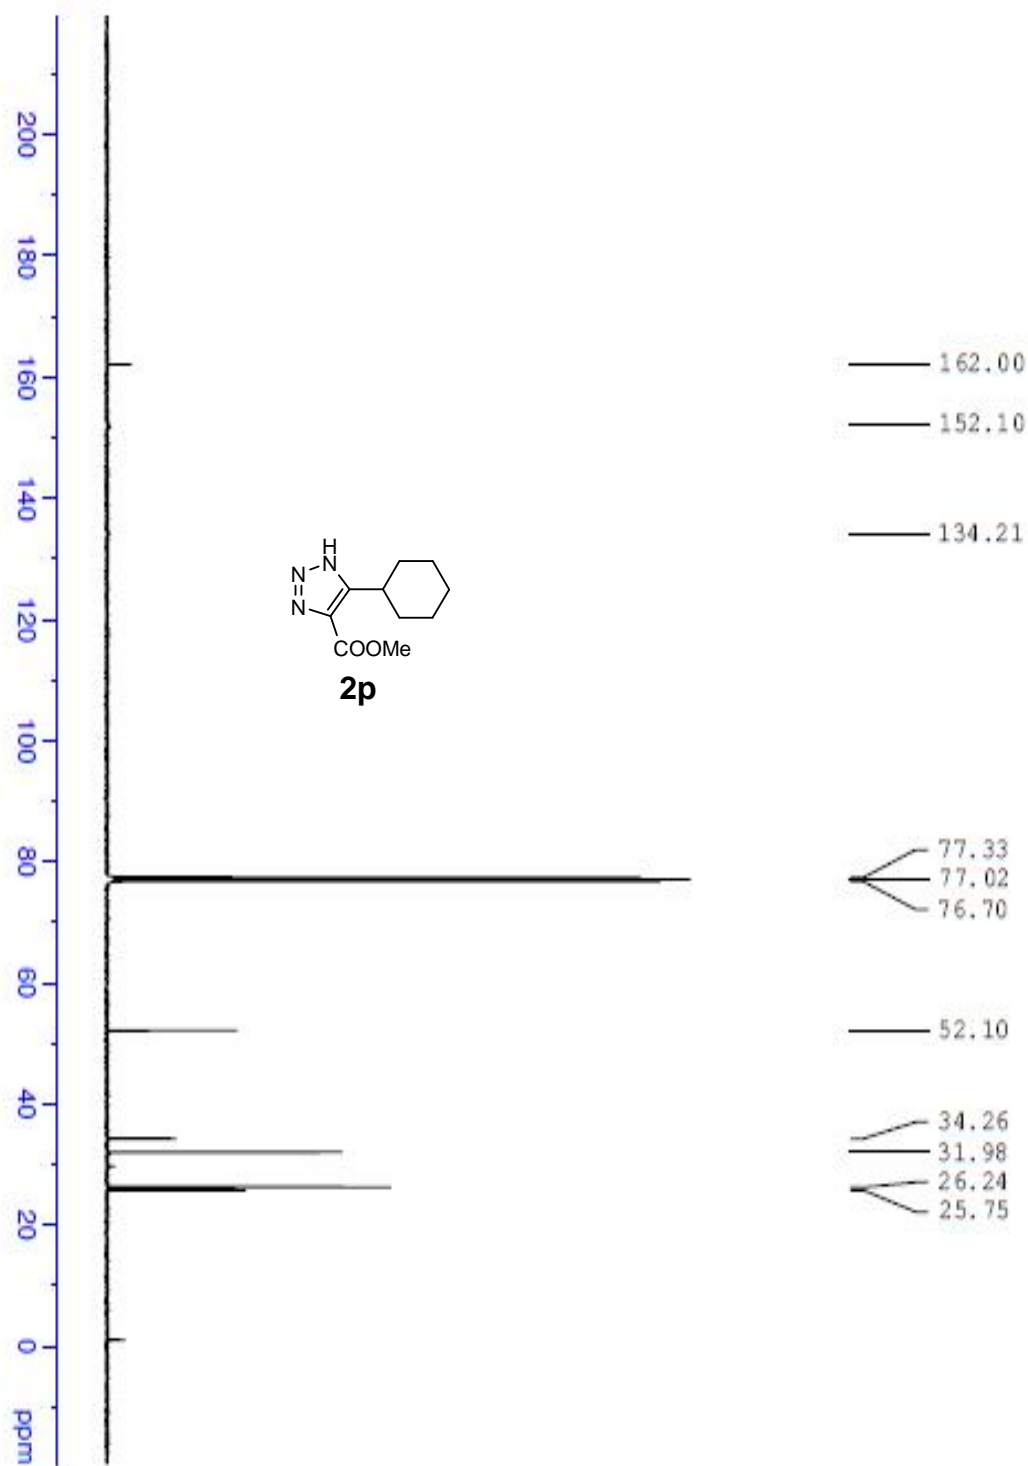

$^{13}\text{C}$  NMR (100 MHz) in  $\text{DMSO-}d_6$  (**2p**)

Method info : A:0.1%TFA in H2O, B:0.1%TFA in ACN, Flow Rate:2.0ml/min  
 COLUMN: XBridge C8 (50X4.6)mm,3.5µm

| Time | % of B |
|------|--------|
| 0    | 5      |
| 8.0  | 100    |
| 8.1  | 100    |
| 8.5  | 5      |
| 10.0 | 5      |

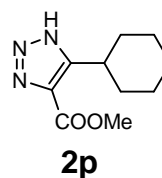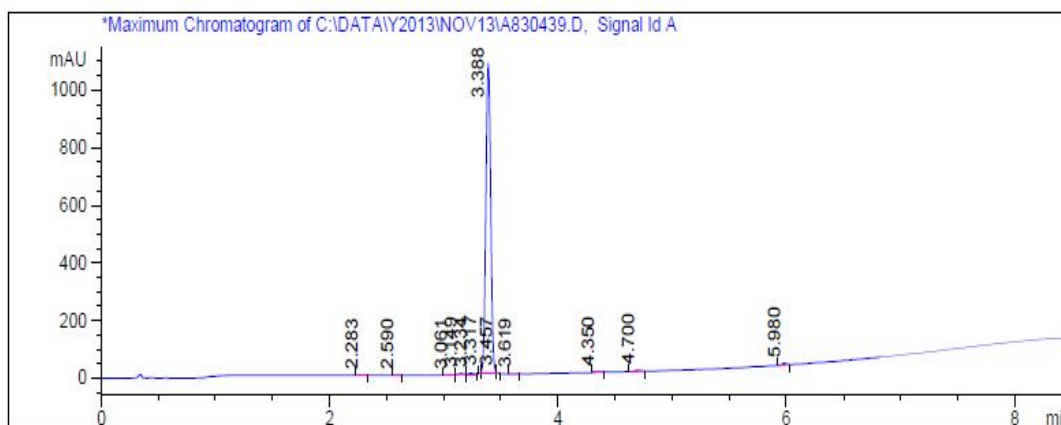

| Peak No | RT min | Area       | Area % |
|---------|--------|------------|--------|
| 1       | 12.283 | 1.158e+001 | 0.36   |
| 2       | 12.590 | 1.994e+000 | 0.06   |
| 3       | 13.061 | 3.543e+000 | 0.11   |
| 4       | 13.149 | 1.483e+001 | 0.46   |
| 5       | 13.234 | 1.857e+001 | 0.57   |
| 6       | 13.317 | 7.646e+000 | 0.24   |
| 7       | 13.388 | 3.145e+003 | 96.70  |
| 8       | 13.457 | 2.277e+000 | 0.07   |
| 9       | 13.619 | 3.762e+000 | 0.12   |
| 10      | 14.350 | 7.162e+000 | 0.22   |
| 11      | 14.700 | 1.958e+001 | 0.60   |
| 12      | 15.980 | 1.627e+001 | 0.50   |

## HPLC (2p)



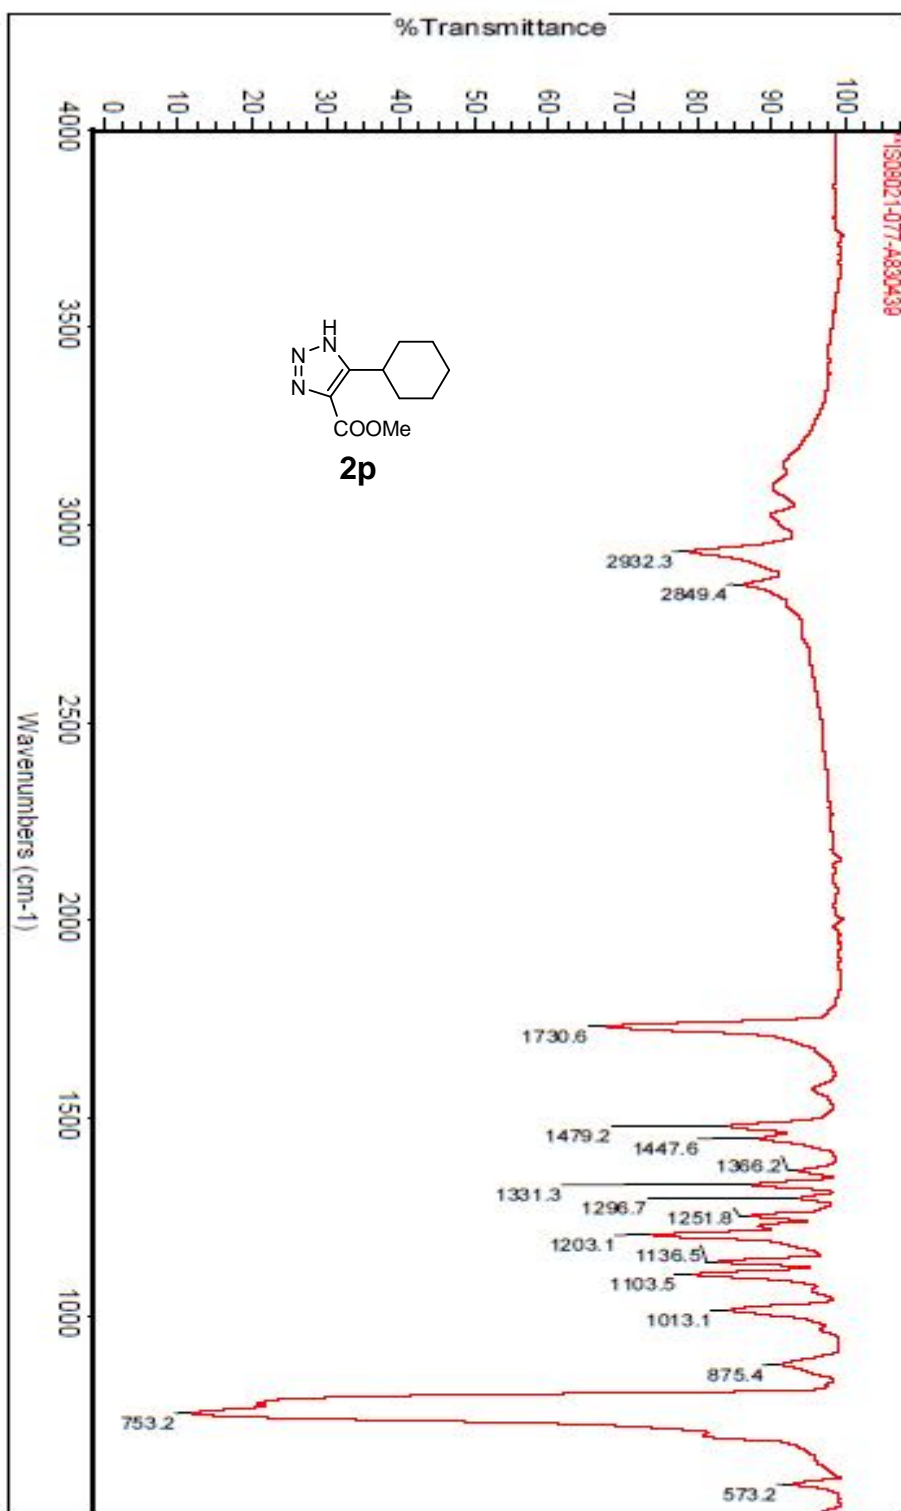

IR (2p)

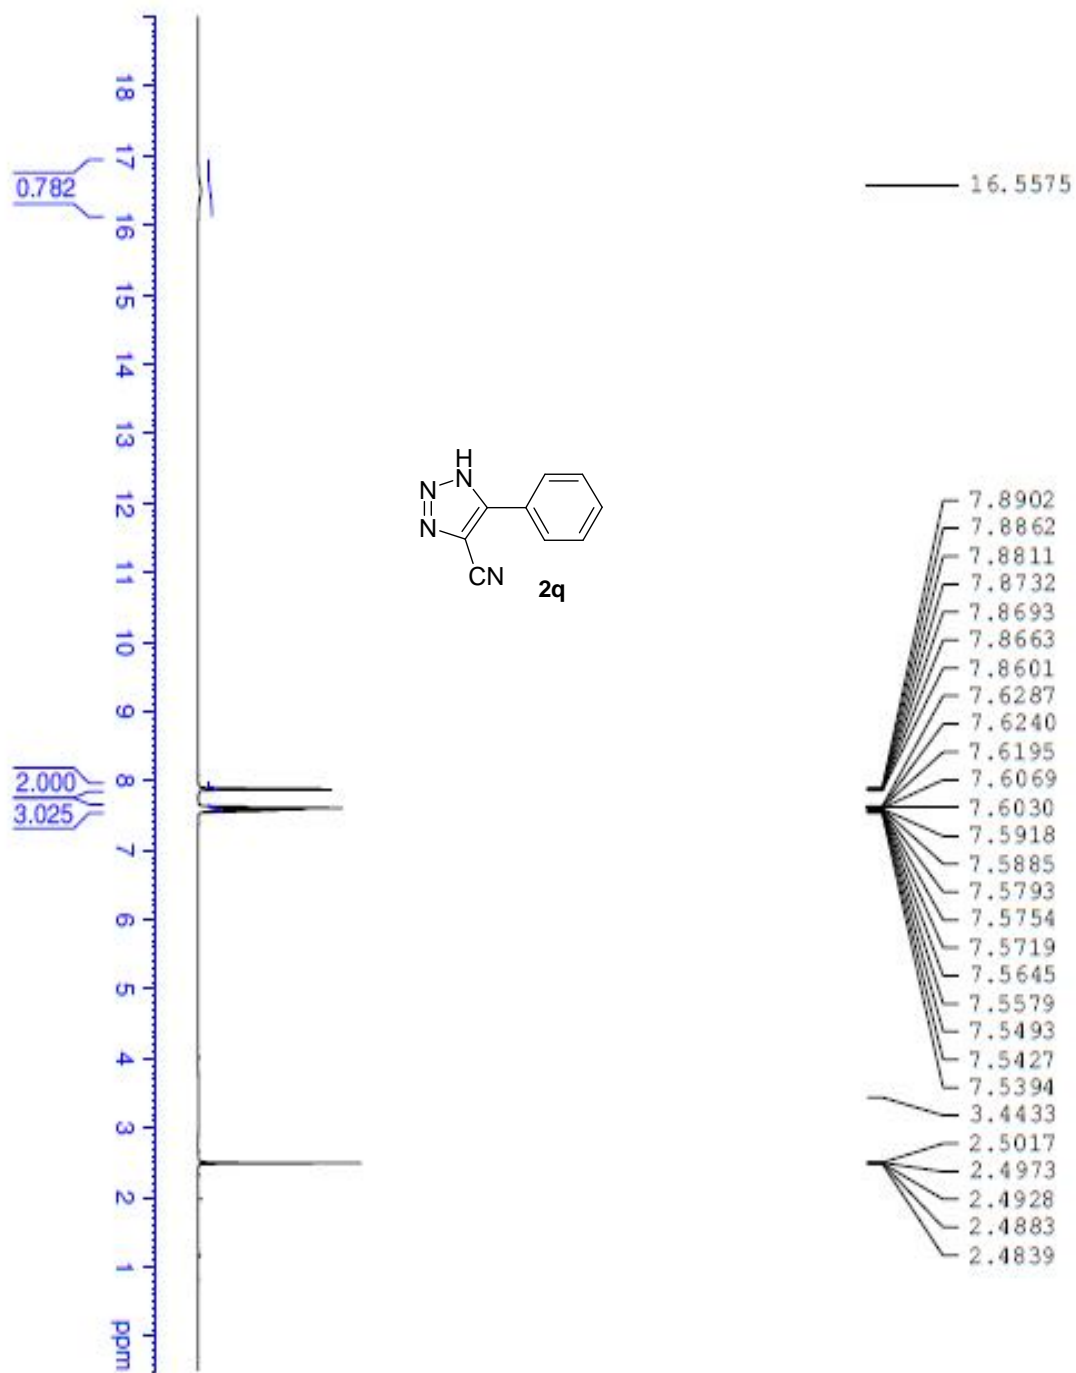

$^1\text{H NMR}$  (400 MHz) in  $\text{DMSO-}d_6$  (**2q**)

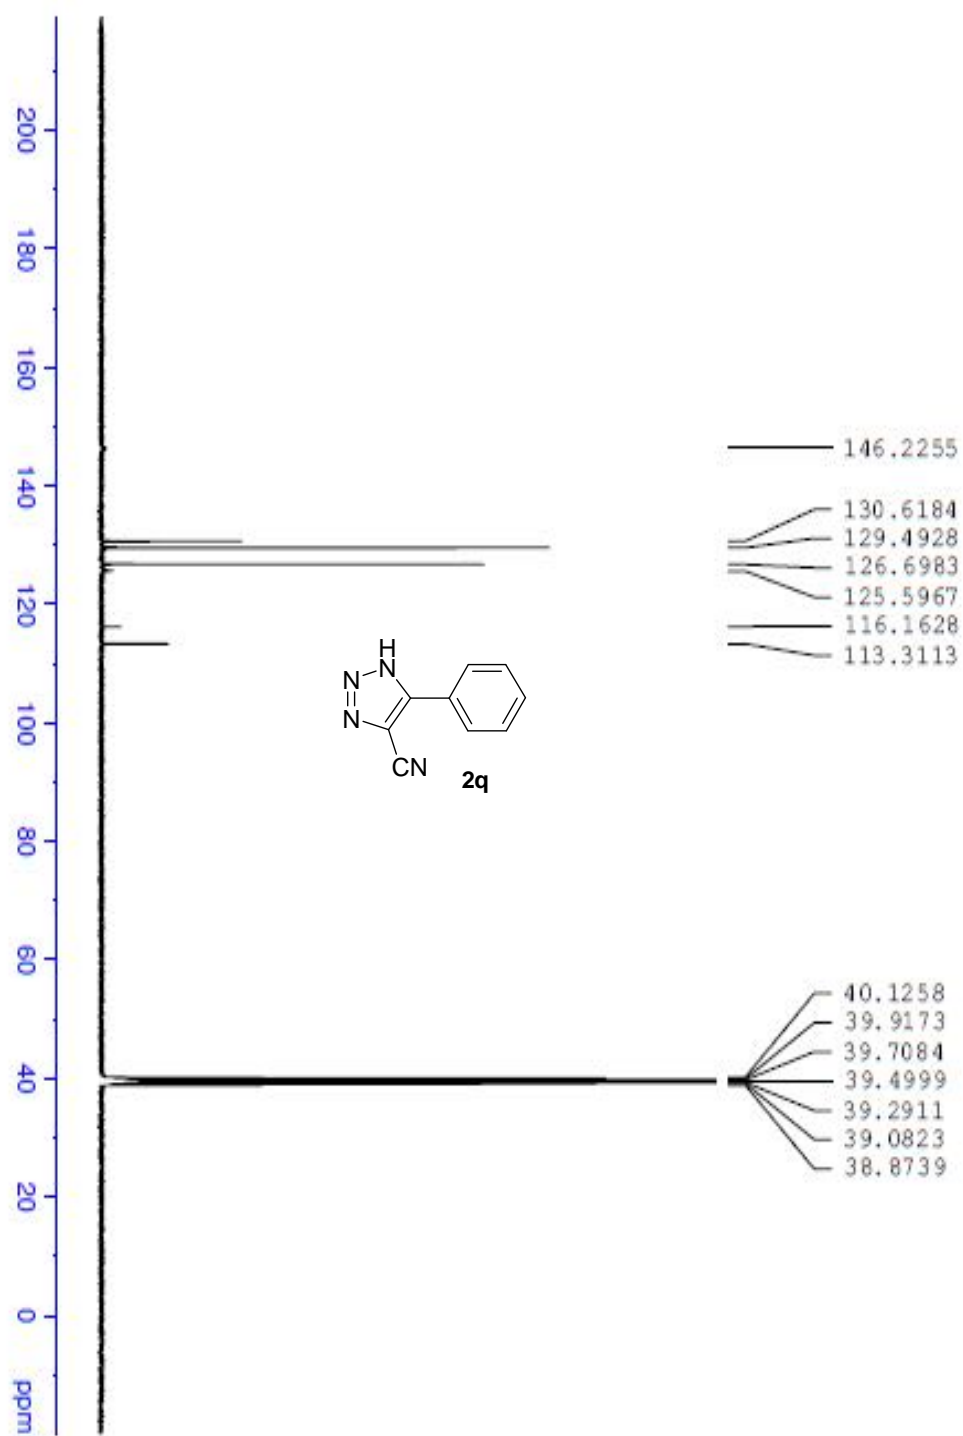

$^{13}\text{C}$  NMR (100 MHz) in  $\text{DMSO-}d_6$  (**2q**)

Method info : A : 10 mM NH<sub>4</sub>HCO<sub>3</sub> H<sub>2</sub>O B: ACN Flow = 1.0 mL/min  
 COLUMN:XBridge C8 (50X4.6)mm,3.5µm , -ve mode

| Time | % of B |
|------|--------|
| 0    | 5      |
| 8.0  | 100    |
| 8.1  | 100    |
| 8.5  | 5      |
| 10.0 | 5      |

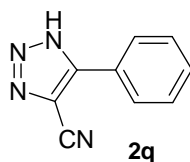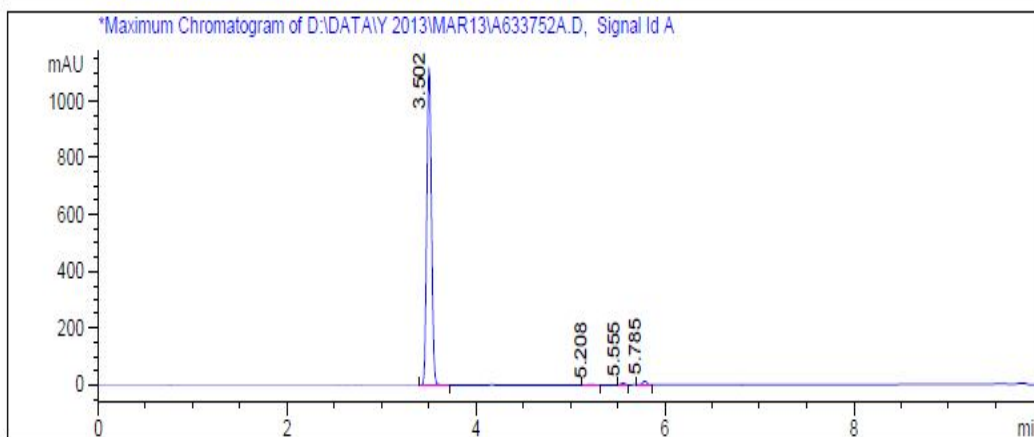

| Peak No | RT min | Area       | Area % |
|---------|--------|------------|--------|
| 1       | 3.502  | 3.908e+003 | 98.348 |
| 2       | 5.208  | 3.817e+000 | 0.096  |
| 3       | 5.555  | 1.995e+001 | 0.502  |
| 4       | 5.785  | 4.189e+001 | 1.054  |

HPLC (2q)

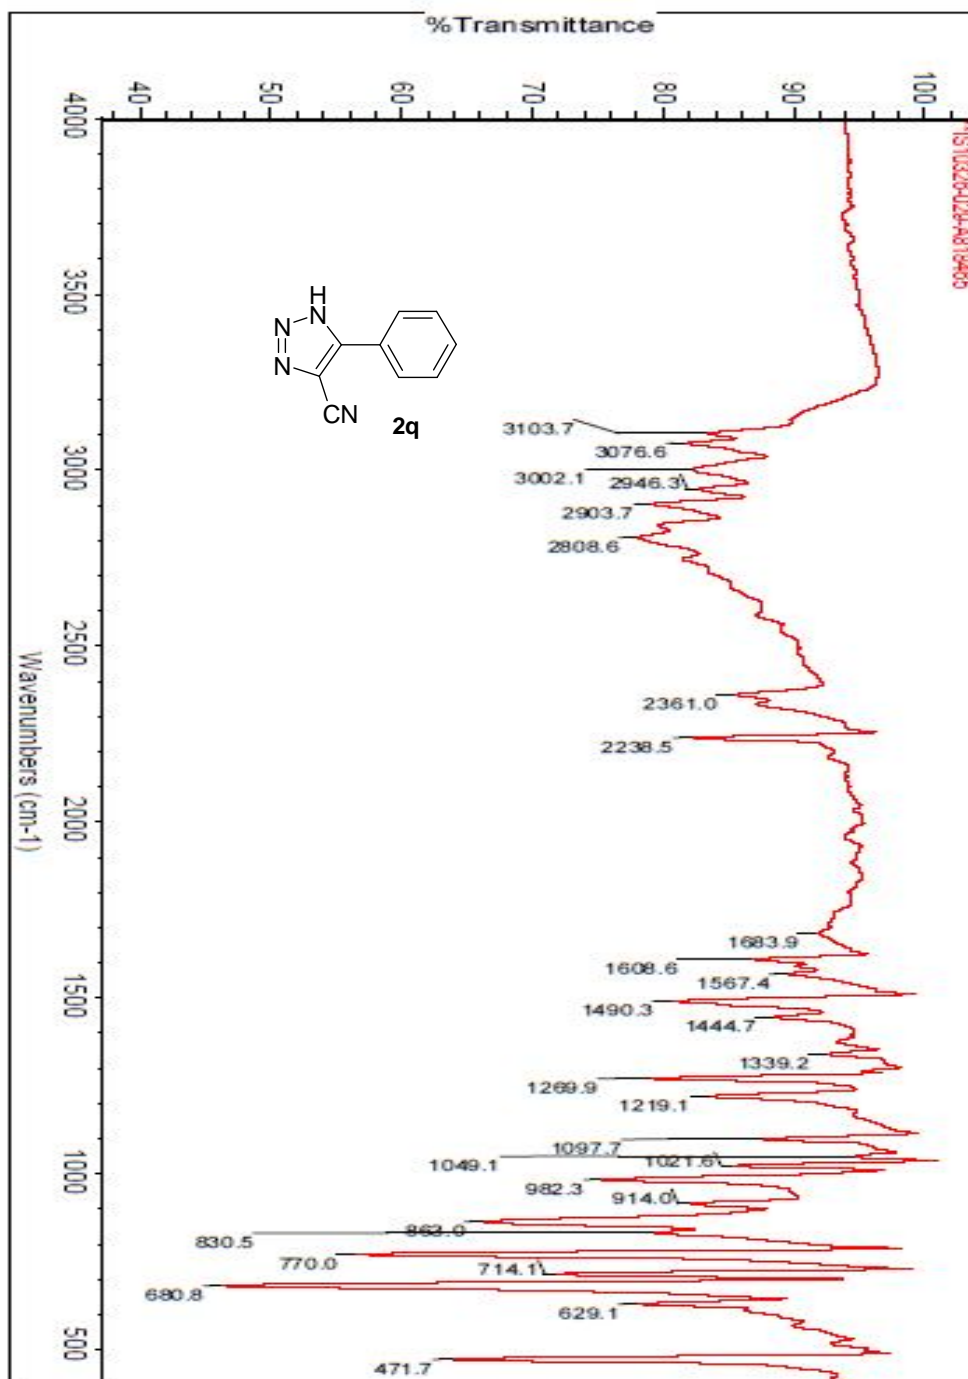

IR (2q)

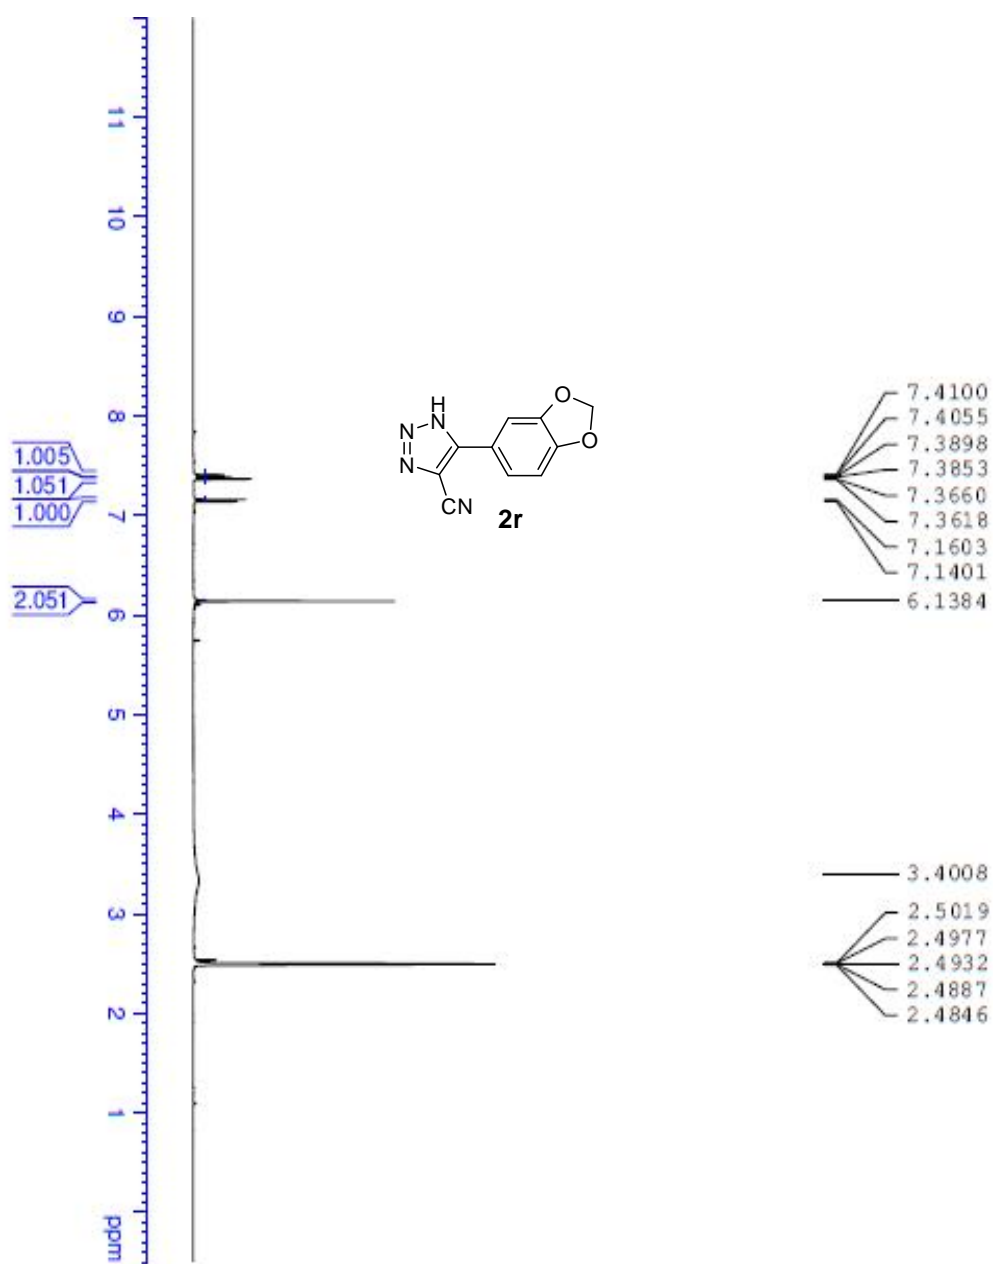

$^1\text{H NMR}$  (400 MHz) in  $\text{DMSO-}d_6$  (**2r**)

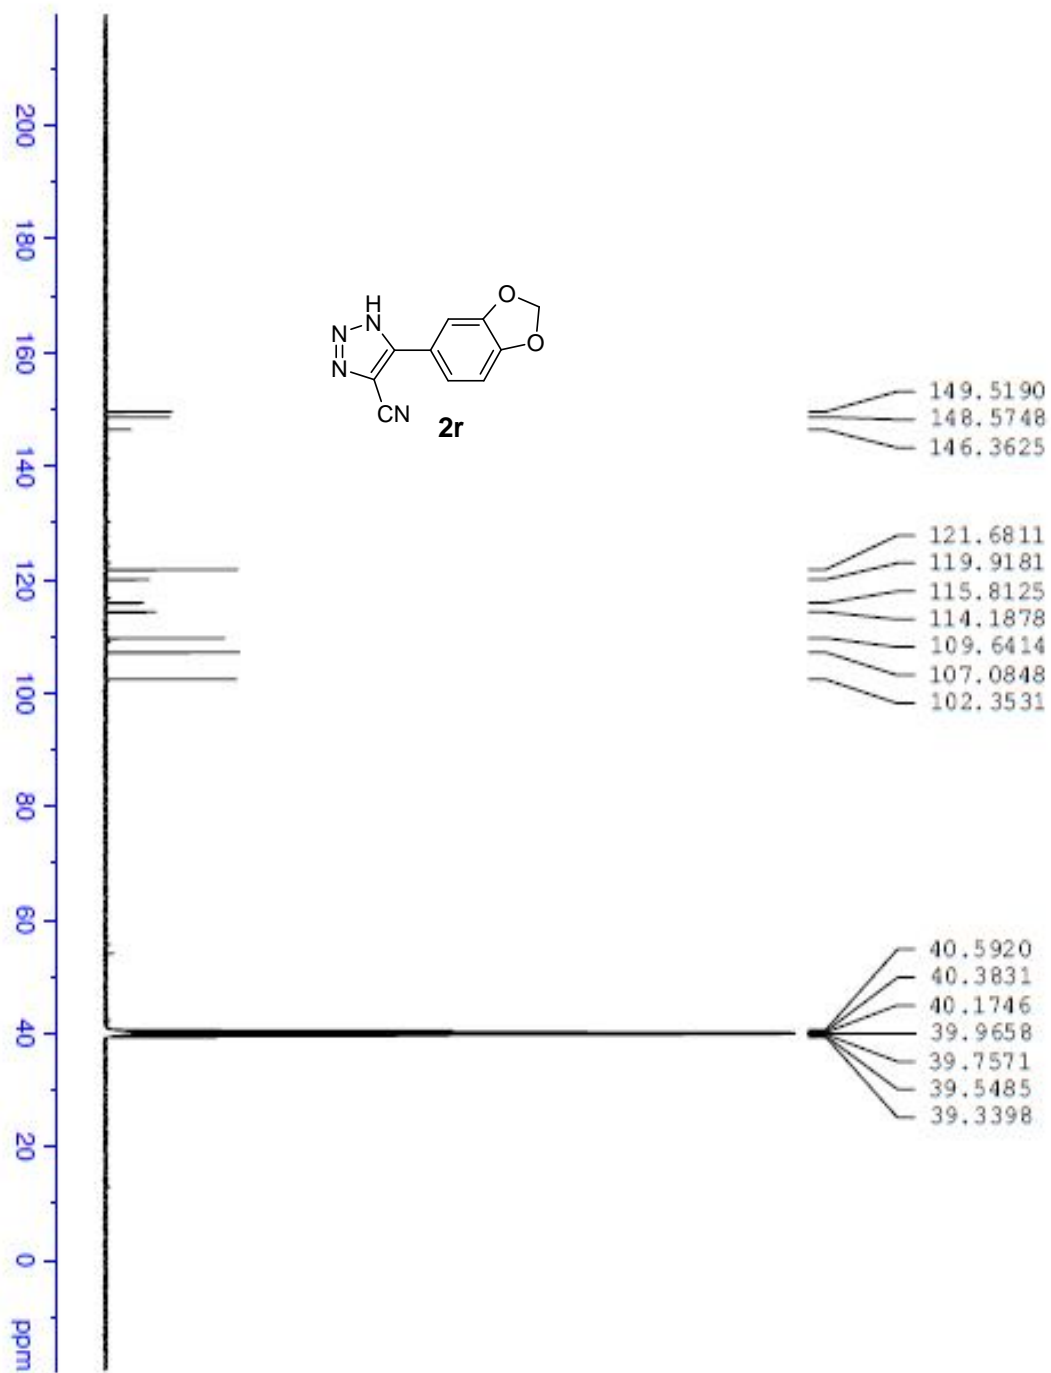

$^{13}\text{C}$  NMR (100 MHz) in  $\text{DMSO-}d_6$  (**2r**)

Method info : A: 0.1% TFA IN H2O , B:0.1% TFA IN ACN ; Flow Rate:2.0 ml/min  
 COLUMN:XBridge C8 (50x4.6mm, 3.5μ), +ve mode

| TIME | %B  |
|------|-----|
| 0    | 05  |
| 8.0  | 100 |
| 8.1  | 100 |
| 8.5  | 05  |
| 10.0 | 05  |

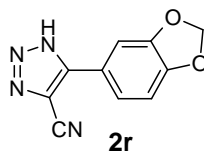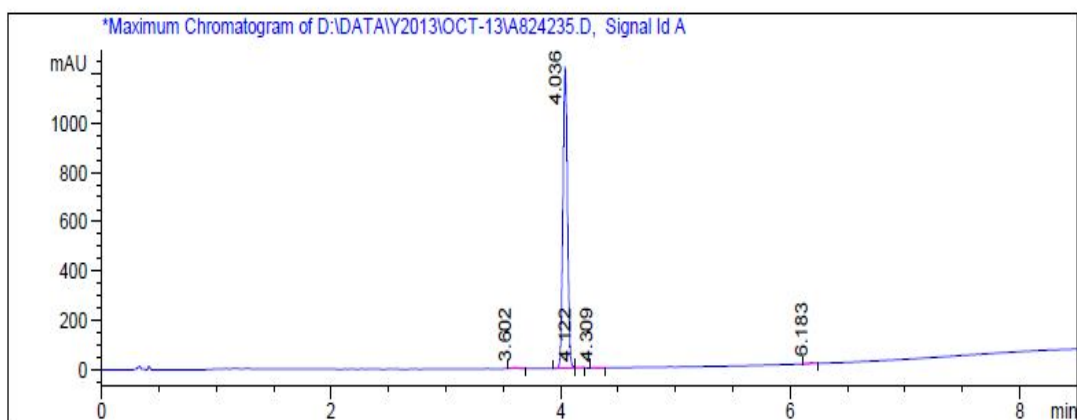

| Peak No | RT min | Area       | Area % |
|---------|--------|------------|--------|
| 1       | 3.602  | 1.739e+001 | 0.511  |
| 2       | 4.036  | 3.359e+003 | 98.680 |
| 3       | 4.122  | 4.808e+000 | 0.141  |
| 4       | 4.309  | 9.103e+000 | 0.267  |
| 5       | 6.183  | 1.361e+001 | 0.400  |

### HPLC (2r)



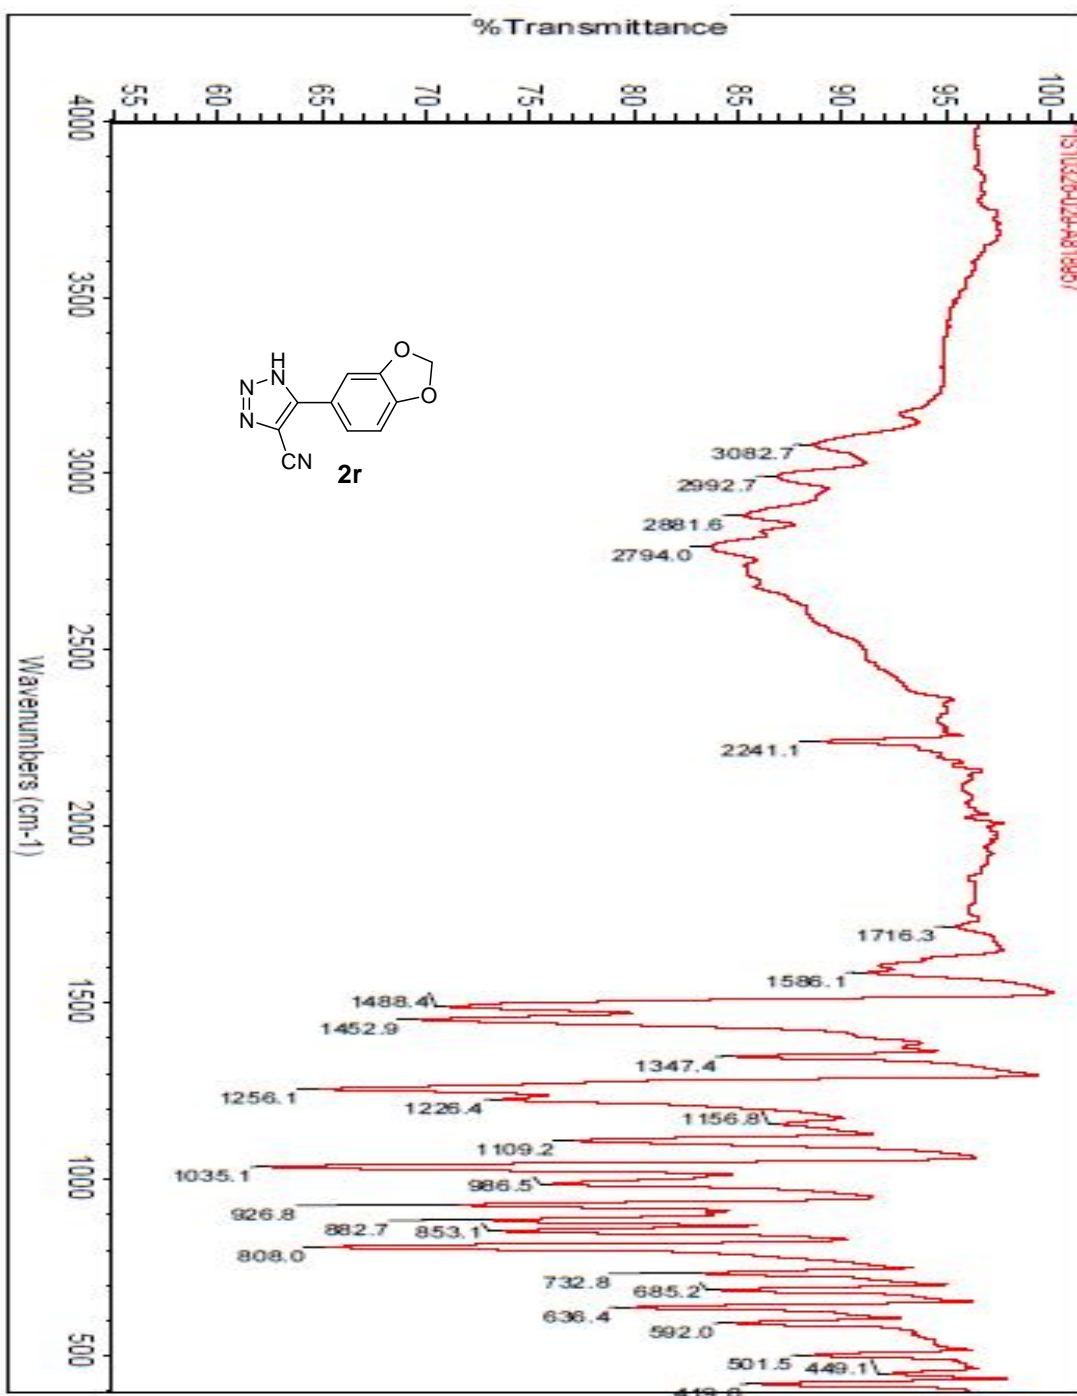

IR (2r)

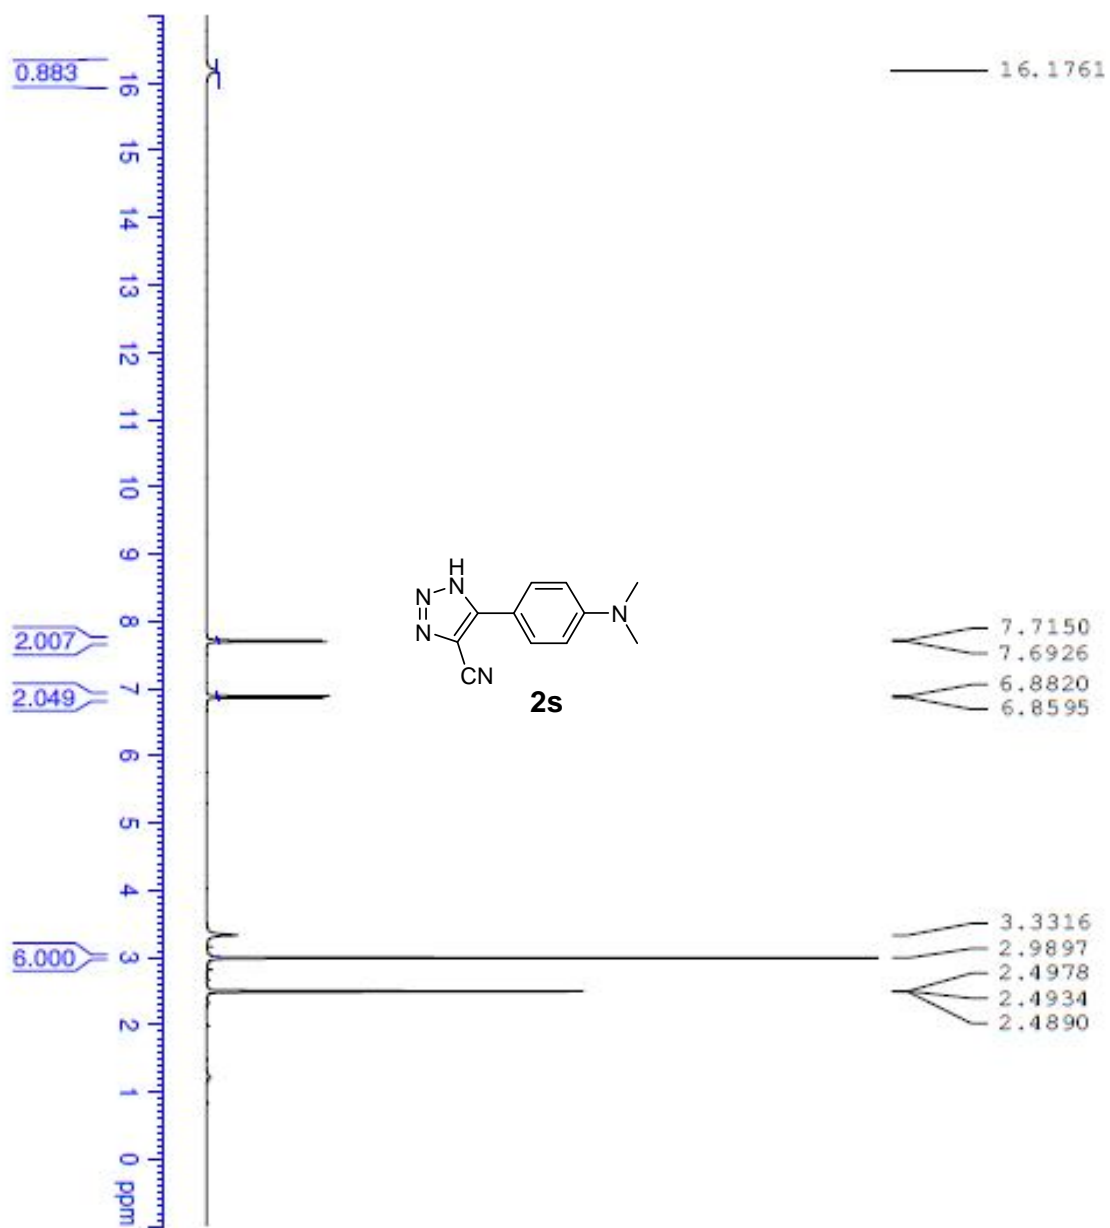

$^1\text{H}$  NMR (400 MHz) in  $\text{DMSO-}d_6$  (**2s**)

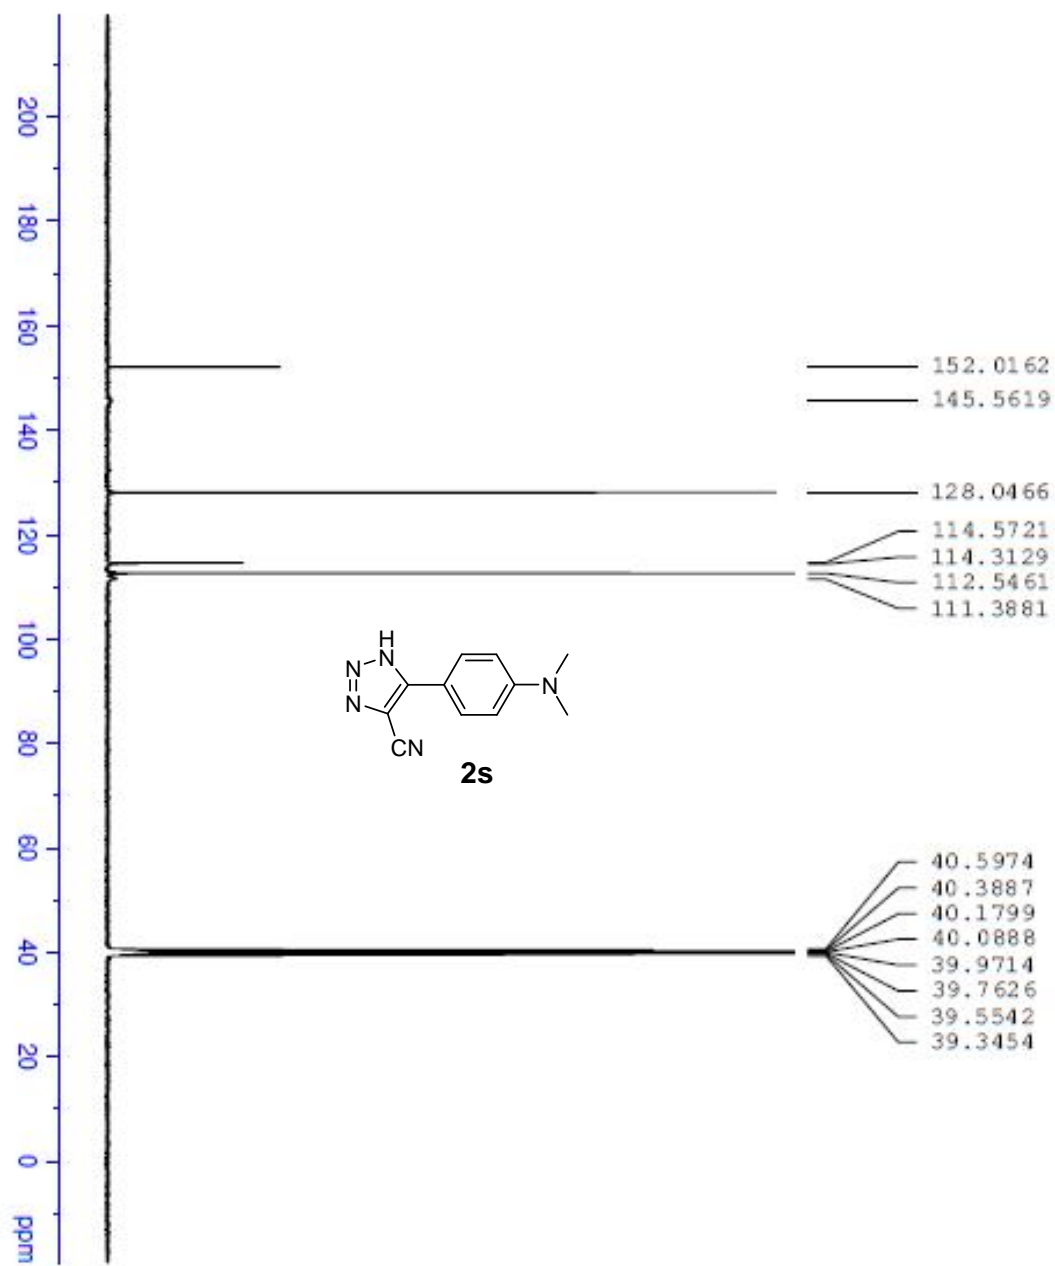

$^{13}\text{C}$  NMR (100 MHz) in  $\text{DMSO-}d_6$  (**2s**)

Method info : A: 0.1% TFA IN H2O , B:0.1% TFA IN ACN ; Flow Rate:2.0 ml/min  
 COLUMN:XBridge C8 (50x4.6mm, 3.5μ), +ve mode

| TIME | %B  |
|------|-----|
| 0    | 05  |
| 8.0  | 100 |
| 8.1  | 100 |
| 8.5  | 05  |
| 10.0 | 05  |

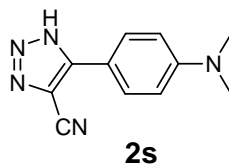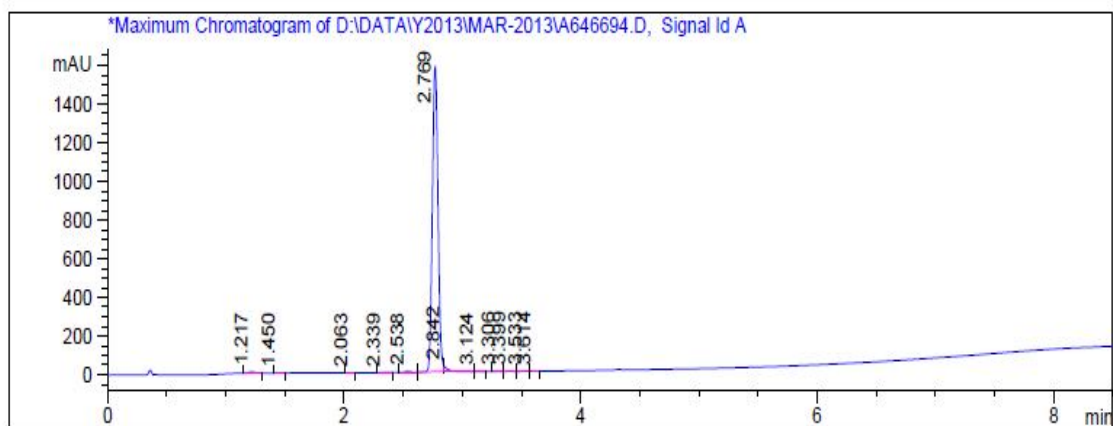

| Peak No | RT min | Area       | Area % |
|---------|--------|------------|--------|
| 1       | 1.217  | 2.648e+001 | 0.492  |
| 2       | 1.450  | 1.461e+000 | 0.027  |
| 3       | 2.063  | 1.535e+000 | 0.029  |
| 4       | 2.339  | 6.883e+000 | 0.128  |
| 5       | 2.538  | 1.539e+001 | 0.286  |
| 6       | 2.769  | 5.227e+003 | 97.188 |
| 7       | 2.842  | 7.976e+001 | 1.483  |
| 8       | 3.124  | 2.635e+000 | 0.049  |
| 9       | 3.306  | 4.325e+000 | 0.080  |
| 10      | 3.399  | 6.432e+000 | 0.120  |
| 11      | 3.533  | 4.157e+000 | 0.077  |
| 12      | 3.614  | 2.185e+000 | 0.041  |

HPLC (2s)

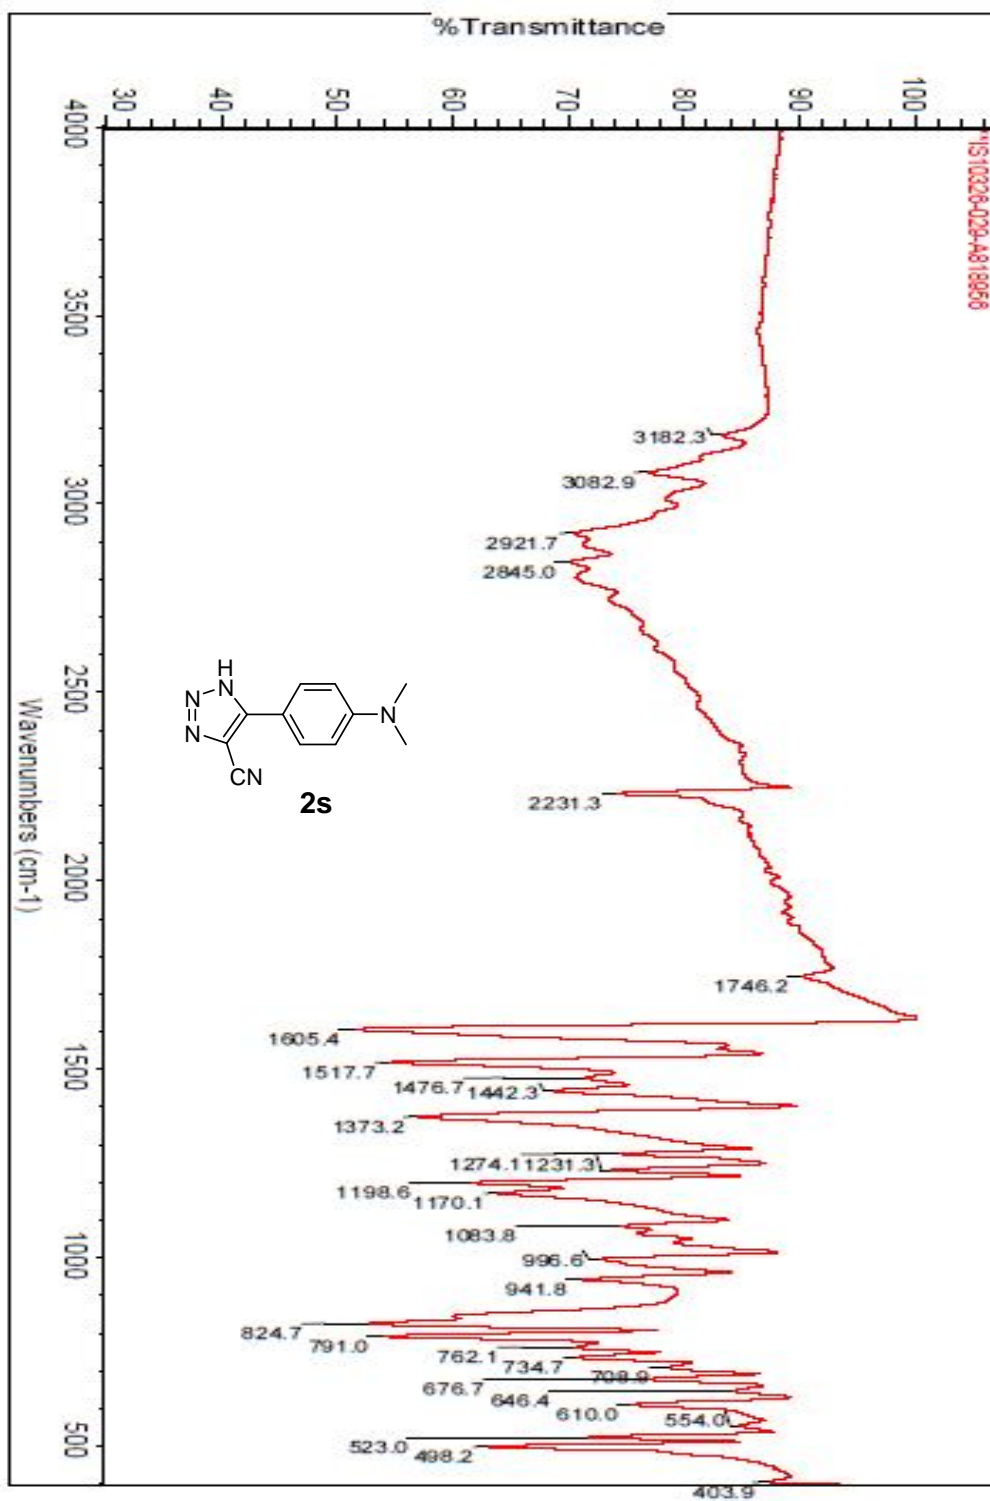

IR (2s)

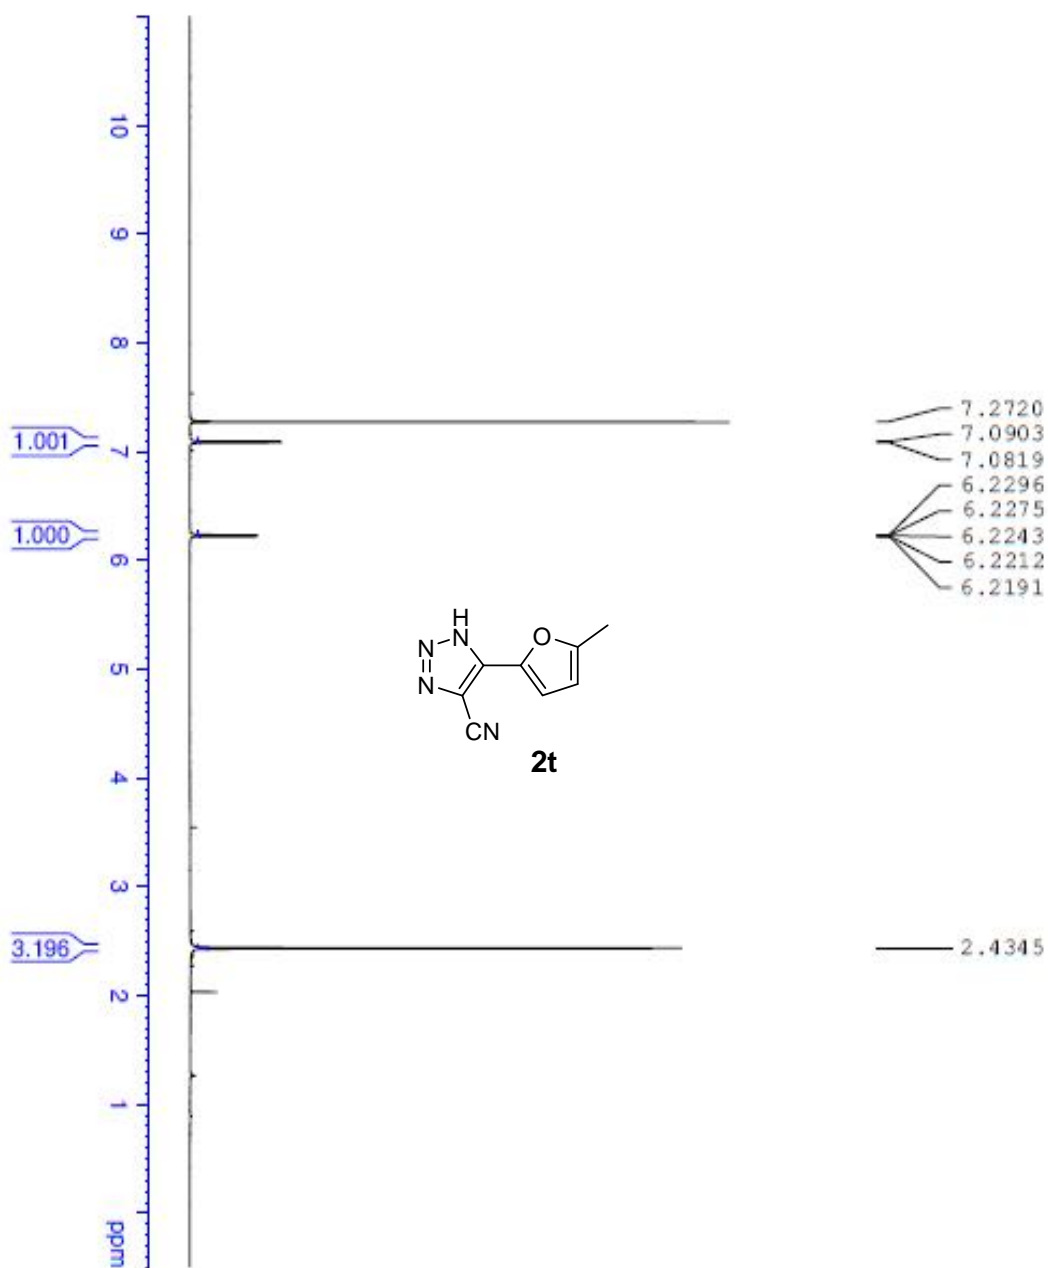

$^1\text{H}$  NMR (400 MHz) in  $\text{CDCl}_3$  (**2t**)

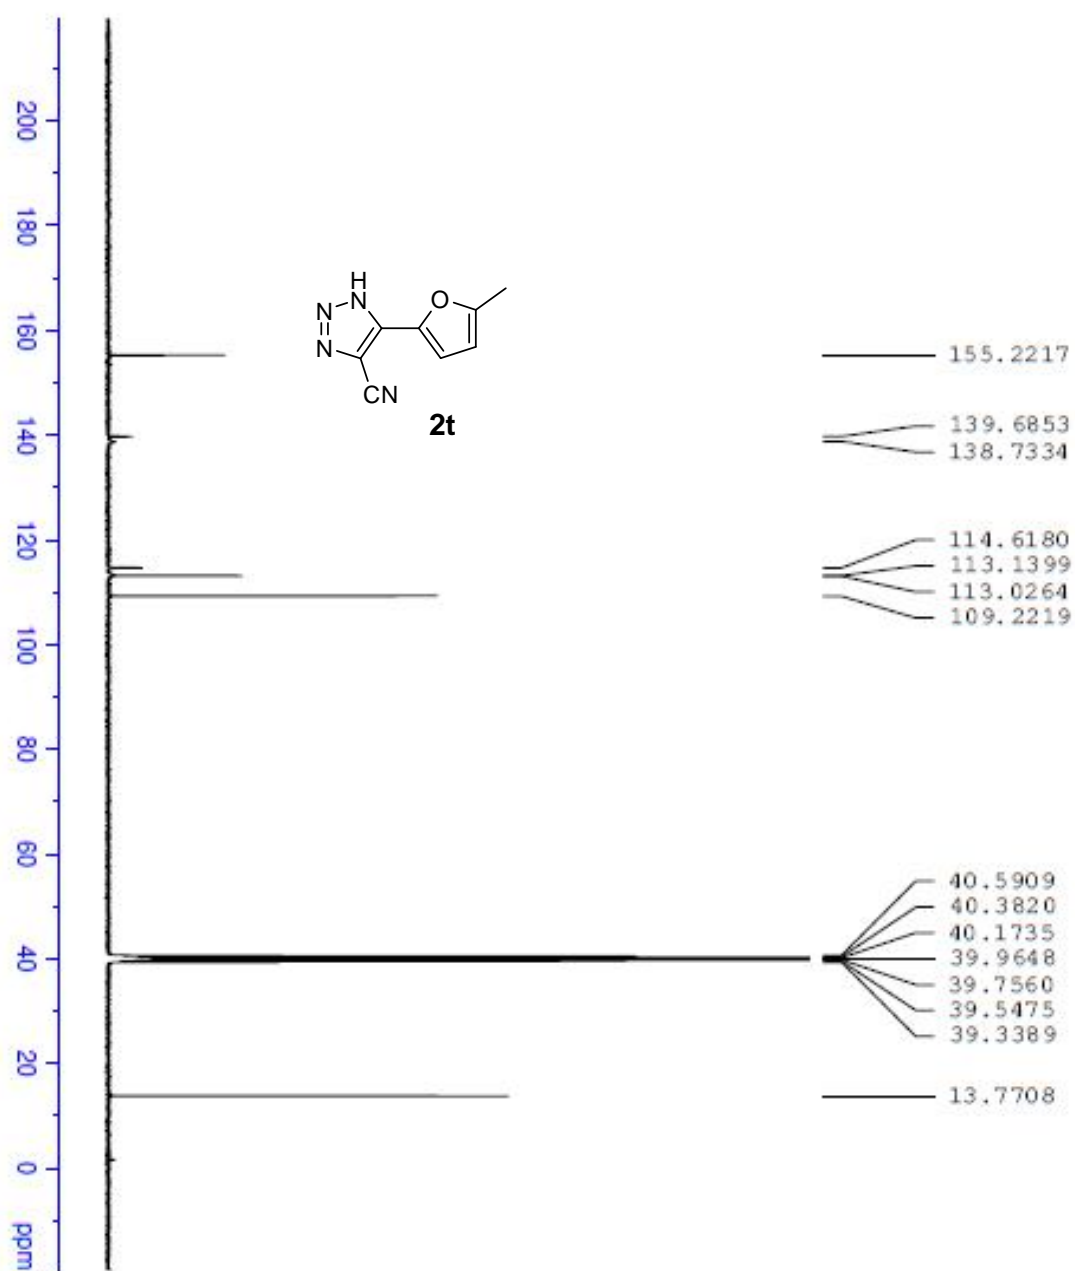

$^{13}\text{C}$  NMR (100 MHz) in  $\text{DMSO-}d_6$  (**2t**)

A : 10 mM NH<sub>4</sub>HCO<sub>3</sub> H<sub>2</sub>O B: ACN Flow = 1.0 mL/min  
 COLUMN:XBridge C8 (50X4.6)mm,3.5µm , -ve mode

| Time | % of B |
|------|--------|
| 0    | 5      |
| 8.0  | 100    |
| 8.1  | 100    |
| 8.5  | 5      |
| 10.0 | 5      |

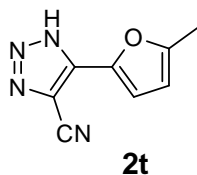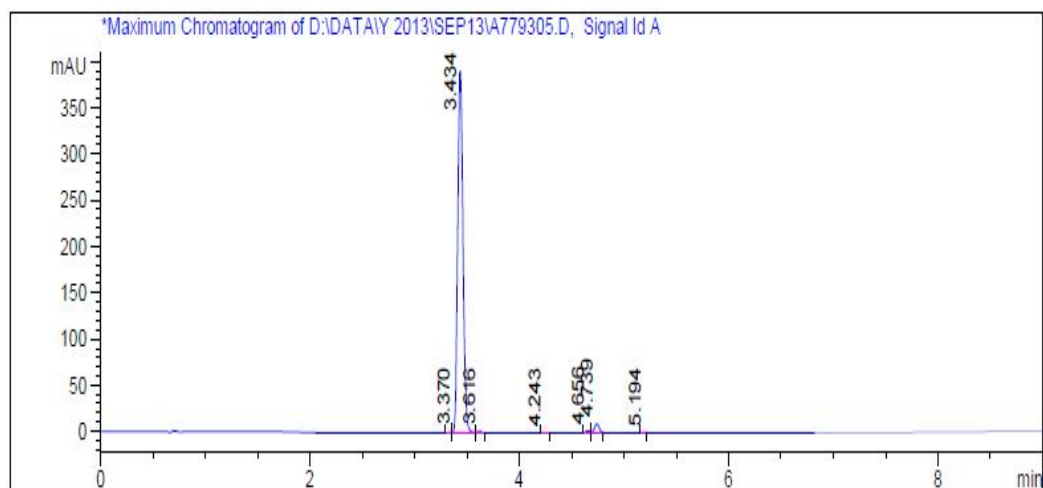

| Peak No | RT min | Area     | Area % |
|---------|--------|----------|--------|
| 11      | 3.370  | 1.756    | 0.124  |
| 12      | 3.434  | 1367.868 | 96.670 |
| 13      | 3.616  | 15.558   | 1.0393 |
| 14      | 4.243  | 11.150   | 0.8081 |
| 15      | 4.656  | 15.863   | 1.1414 |
| 16      | 4.739  | 31.318   | 2.213  |
| 17      | 5.194  | 11.478   | 0.8104 |

### HPLC (2t)



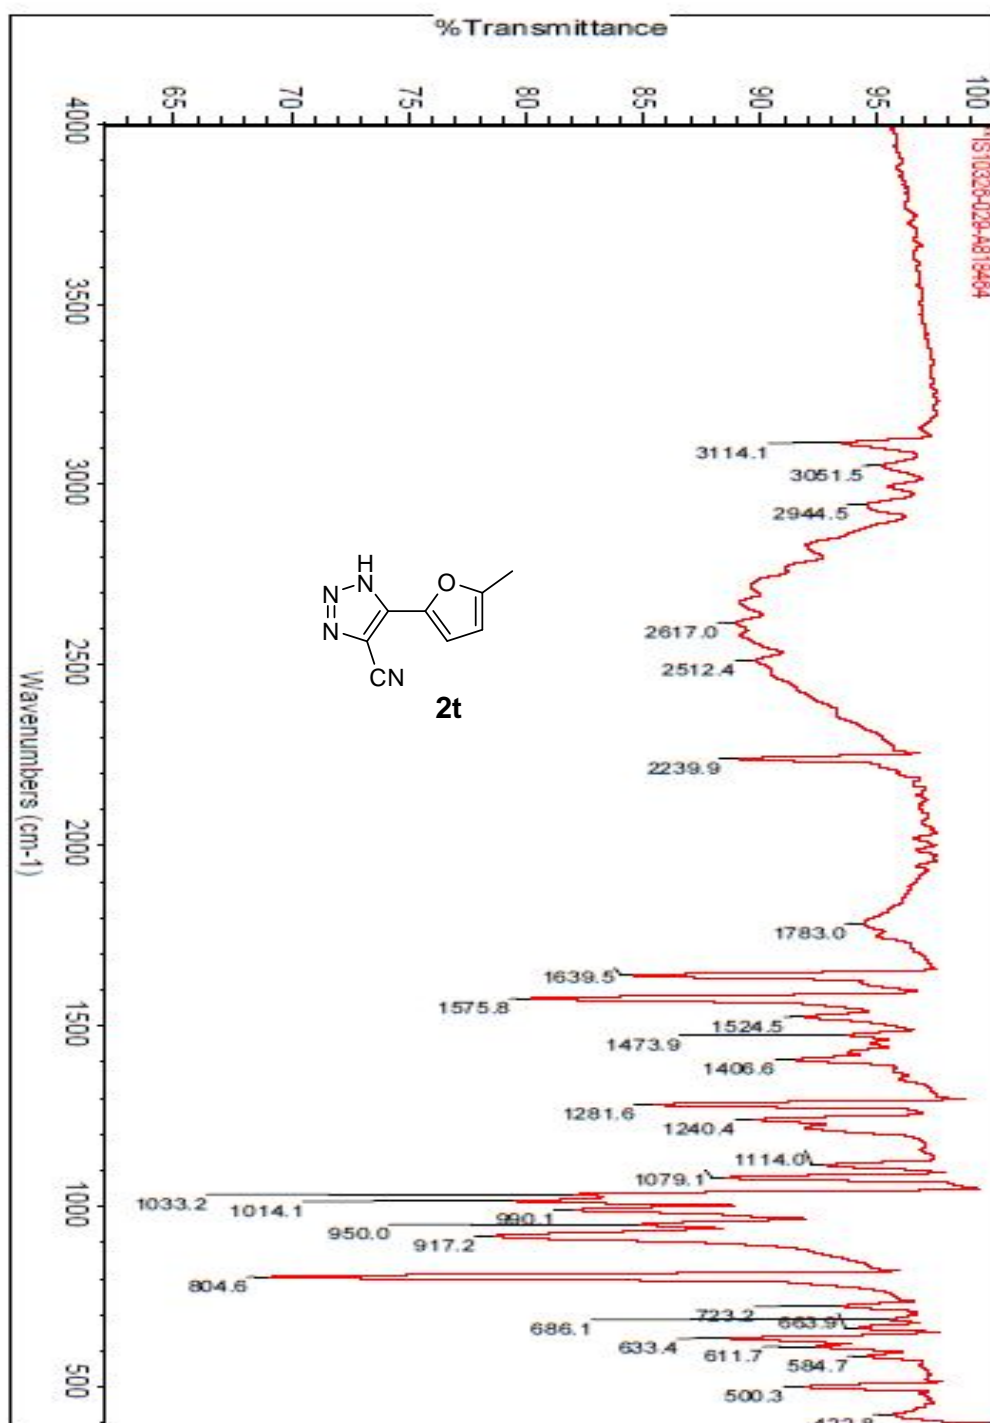

IR (2t)

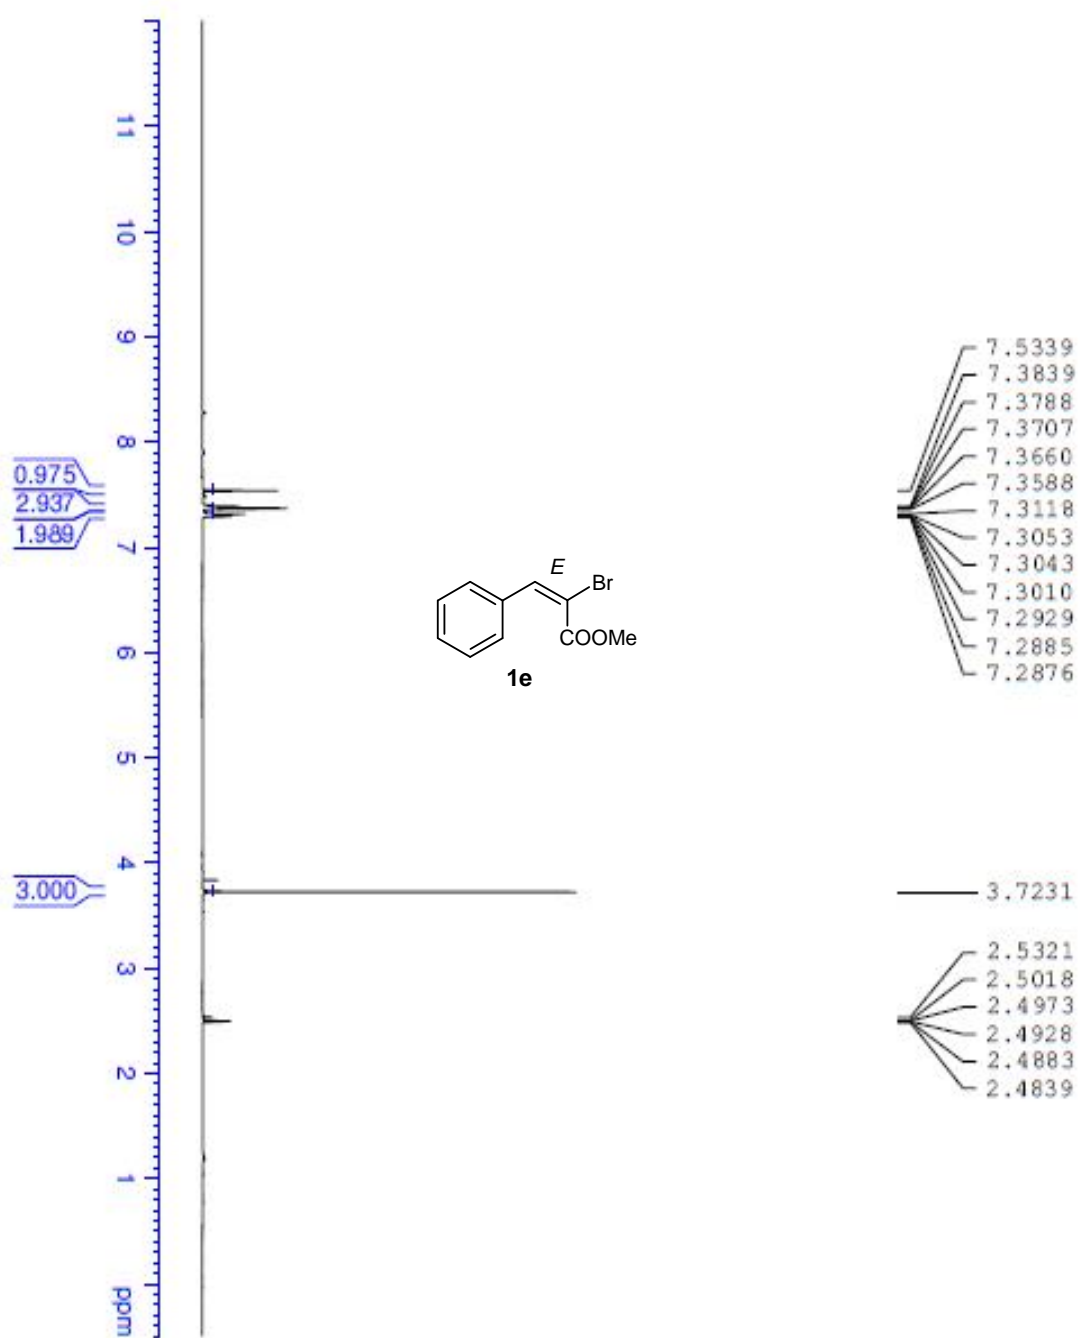

<sup>1</sup>H NMR (400 MHz) in DMSO-*d*<sub>6</sub> (**1e**)

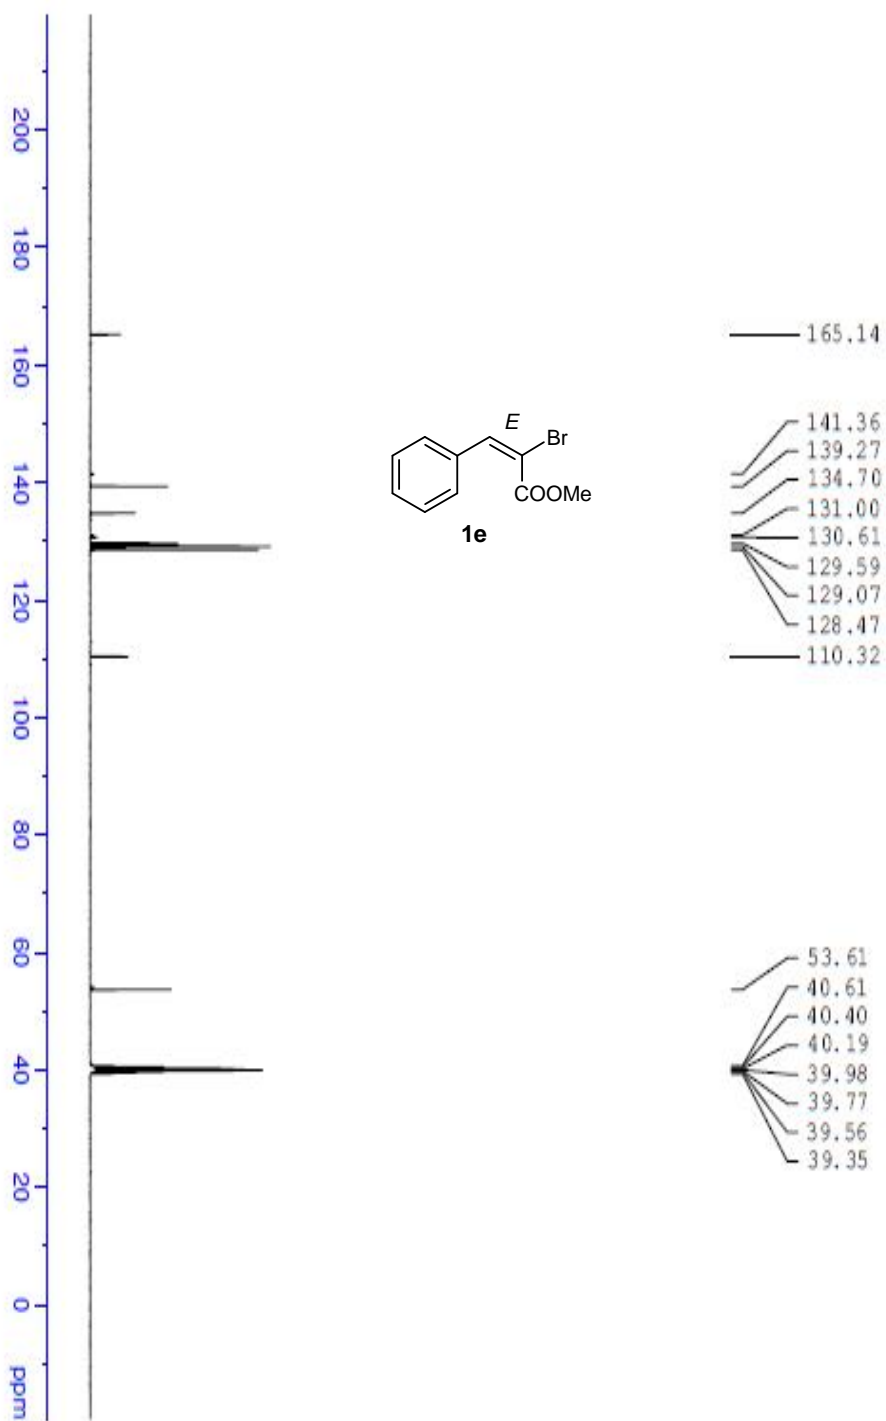

$^{13}\text{C}$  NMR (100 MHz) in DMSO- $d_6$  (**1e**)

Method info : A : 0.1%TFA IN H2O B: 0.1%TFA IN ACN Flow = 2.0 mL/min  
 COLUMN:XBridge C8 (50X4.6)mm,3.5µm , +ve mode

| Time | % of B |
|------|--------|
| 0    | 5      |
| 8.0  | 100    |
| 8.1  | 100    |
| 8.5  | 5      |
| 10.0 | 5      |

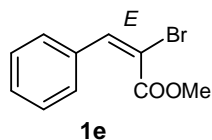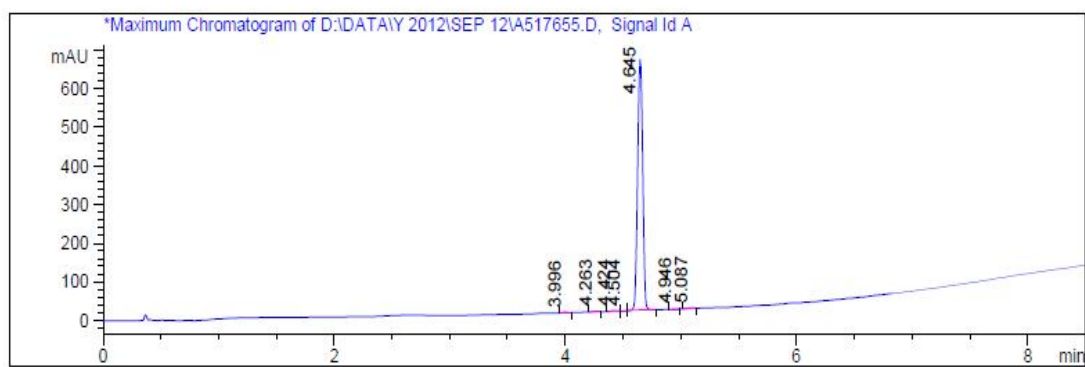

| Peak No | RT min | Area       | Area % |
|---------|--------|------------|--------|
| 1       | 3.996  | 3.698e+000 | 0.186  |
| 2       | 4.263  | 5.120e+000 | 0.257  |
| 3       | 4.424  | 5.185e+000 | 0.261  |
| 4       | 4.504  | 1.187e+000 | 0.060  |
| 5       | 4.645  | 1.967e+003 | 98.820 |
| 6       | 4.946  | 2.314e+000 | 0.116  |
| 7       | 5.087  | 5.975e+000 | 0.300  |

### HPLC (1e)

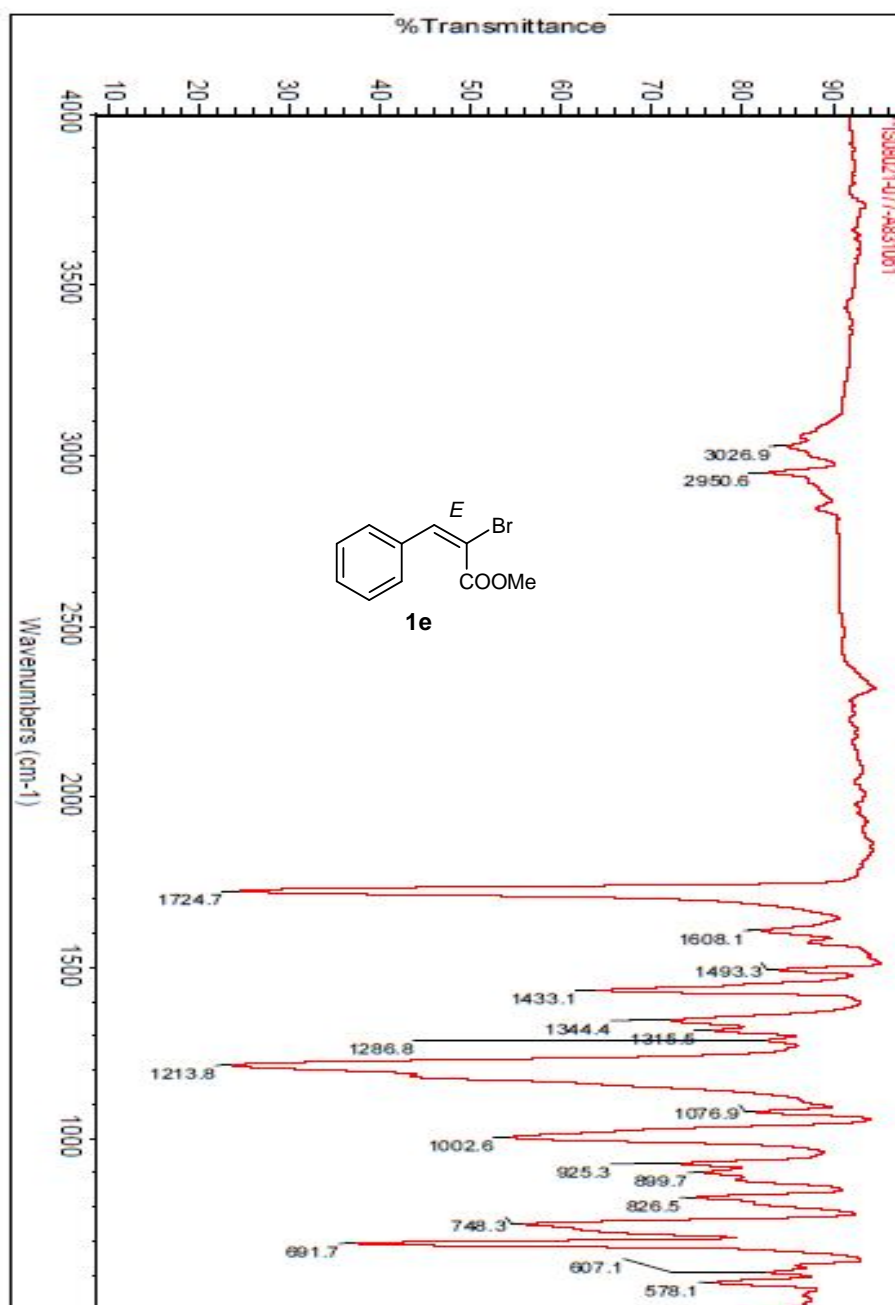

IR (1e)

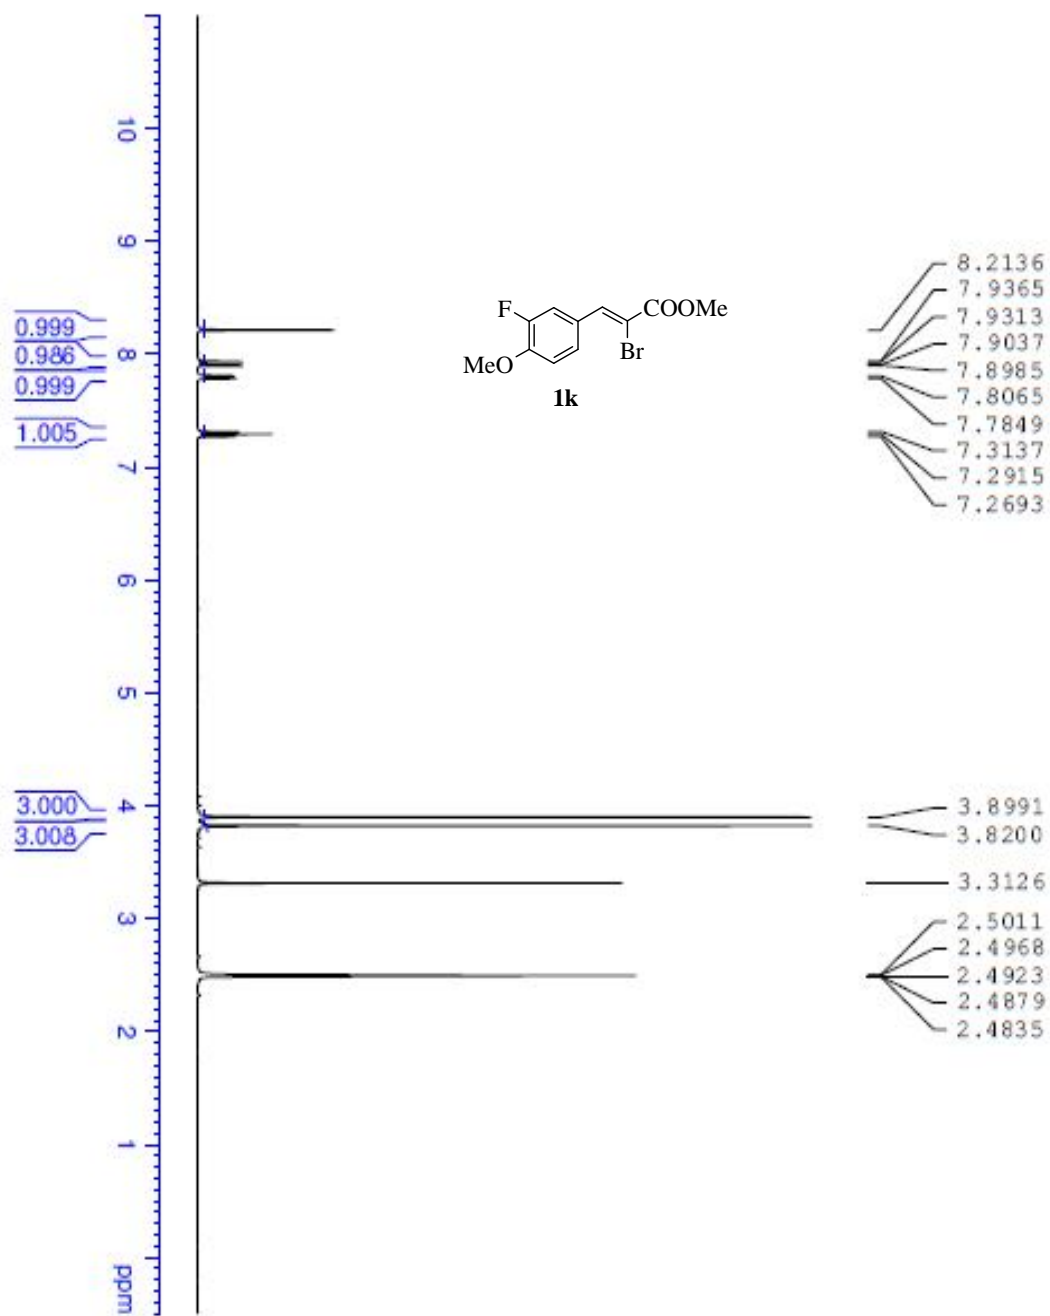

<sup>1</sup>H NMR (400 MHz) in DMSO-*d*<sub>6</sub> (**1k**)

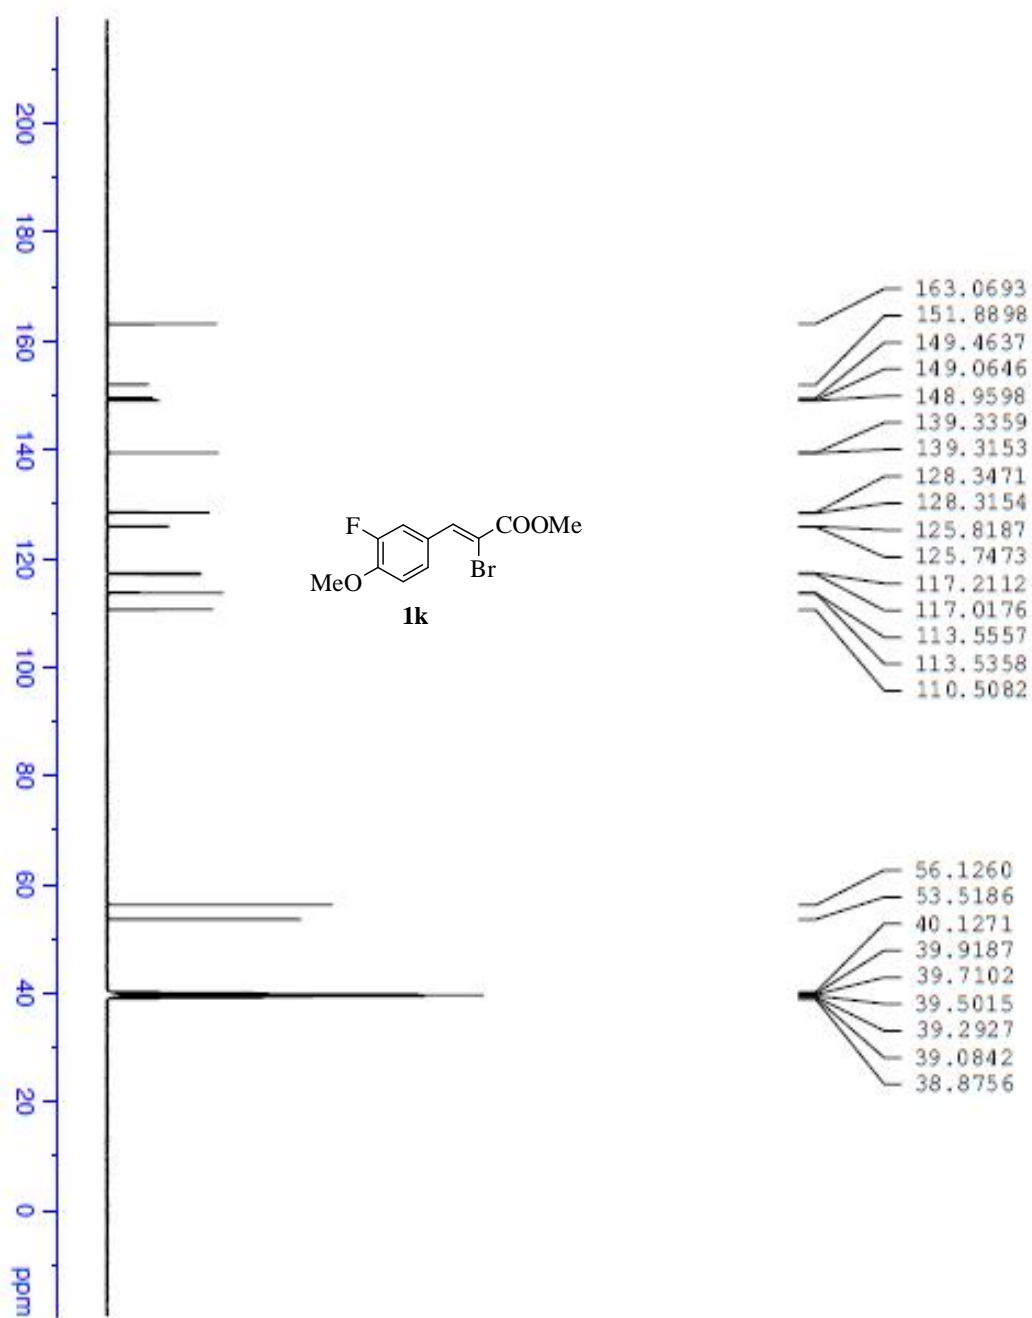

$^{13}\text{C}$  NMR (100 MHz) in  $\text{DMSO-}d_6$  (**1k**)

Method info : A:0.1%TFA in H2O, B:0.1%TFA in ACN, Flow Rate:2.0ml/min

COLUMN: XBridge C8 (50X4.6)mm,3.5µm

| Time | % of B |
|------|--------|
| 0    | 5      |
| 8.0  | 100    |
| 8.1  | 100    |
| 8.5  | 5      |
| 10.0 | 5      |

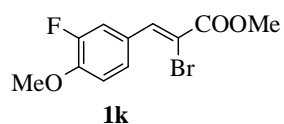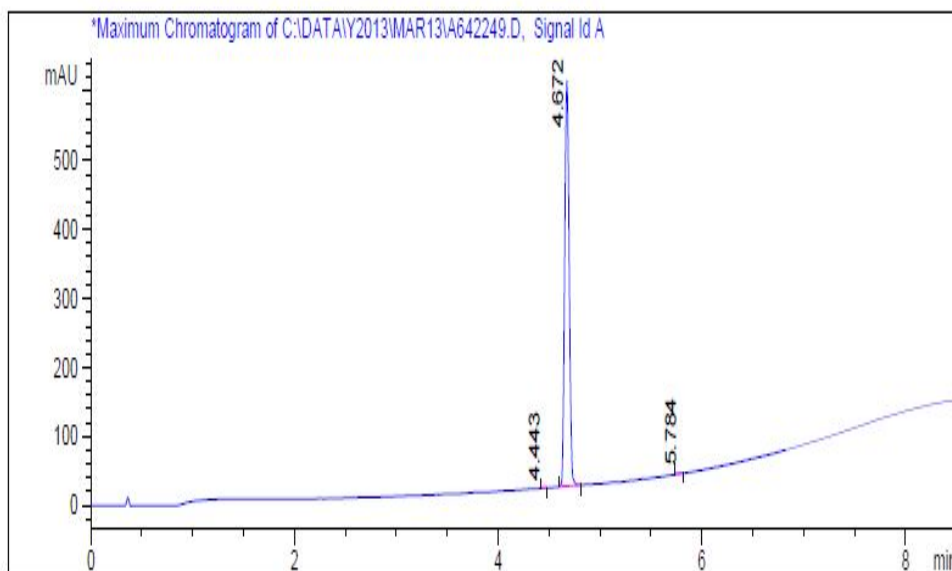

| Peak No | RT min | Area       | Area % |
|---------|--------|------------|--------|
| 1       | 4.443  | 1.661e+000 | 0.09   |
| 2       | 4.672  | 1.791e+003 | 99.71  |
| 3       | 5.784  | 3.478e+000 | 0.19   |

HPLC (1k)



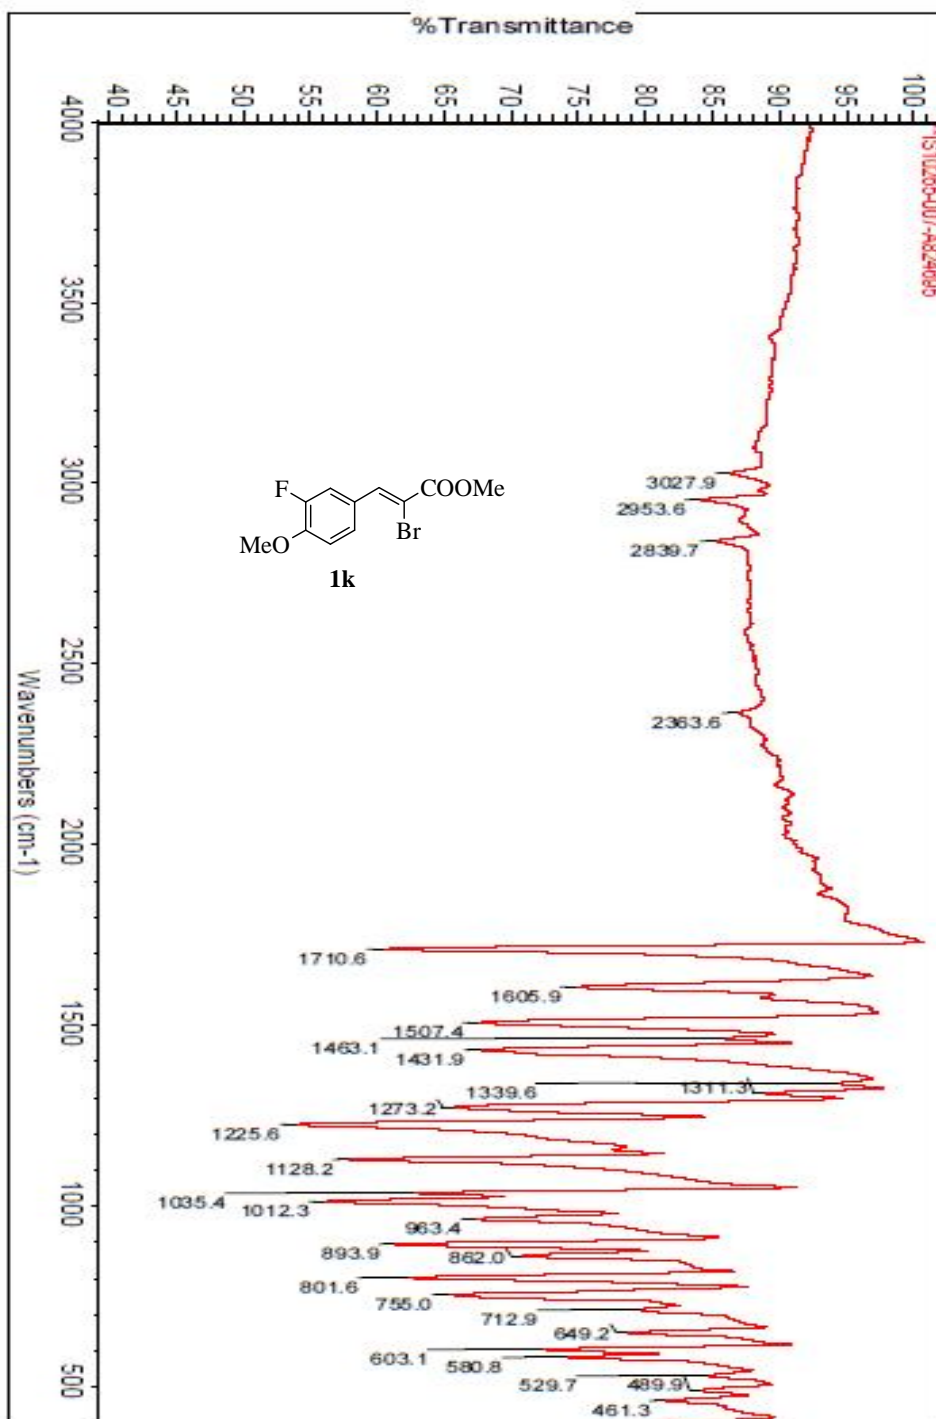

IR (**1k**)

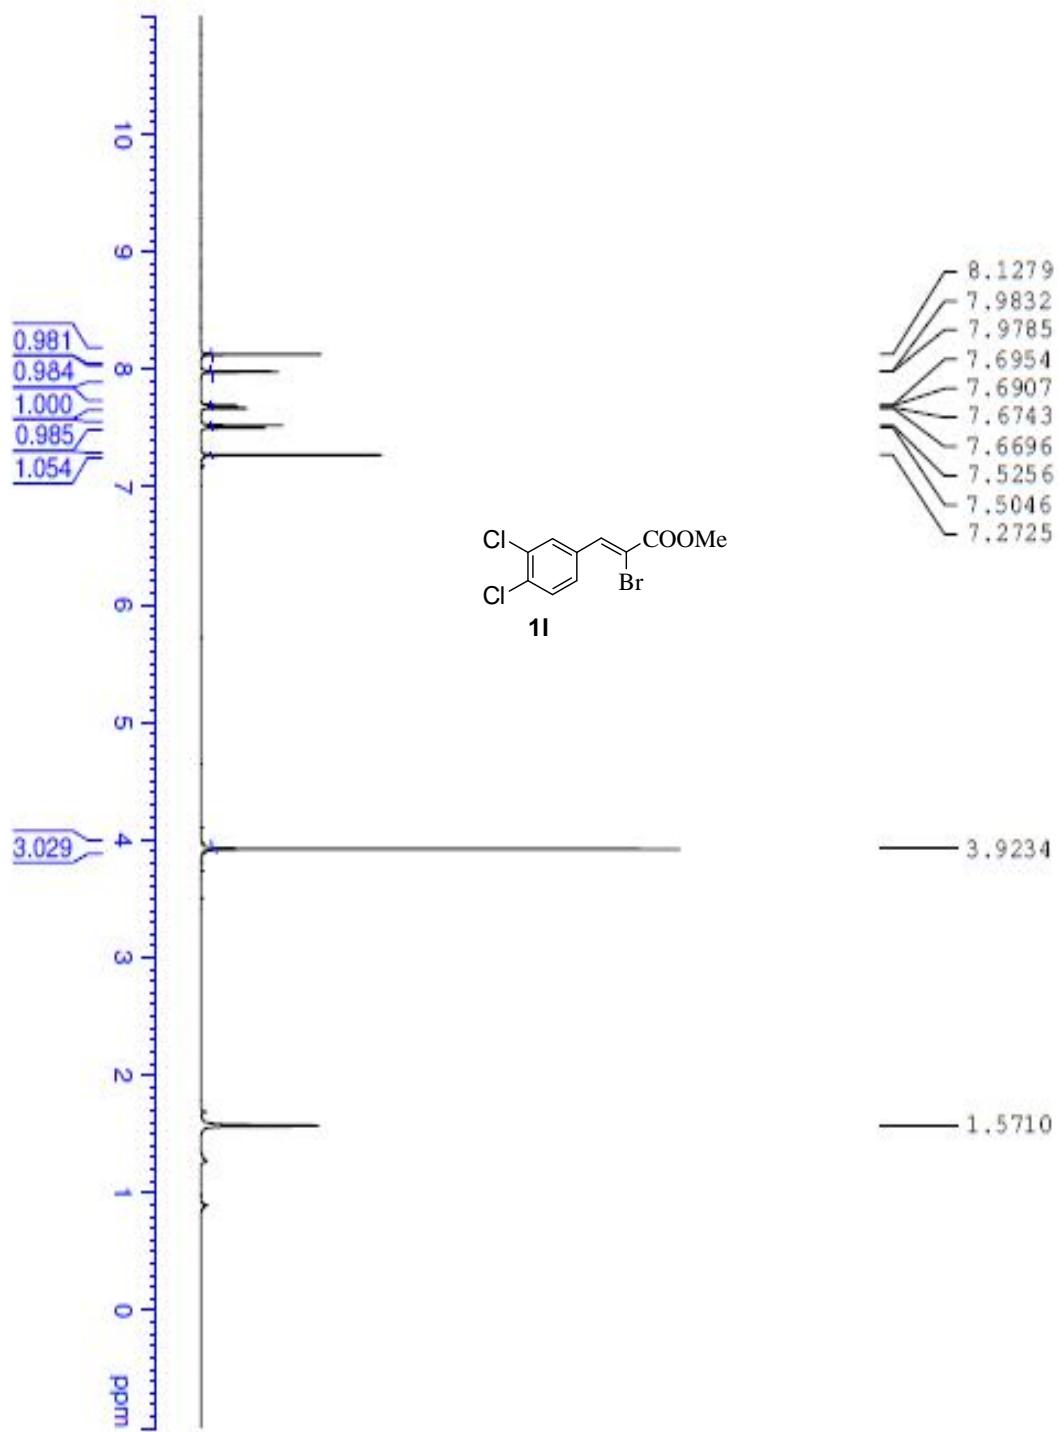

<sup>1</sup>H NMR (400 MHz) in CDCl<sub>3</sub> (**1I**)

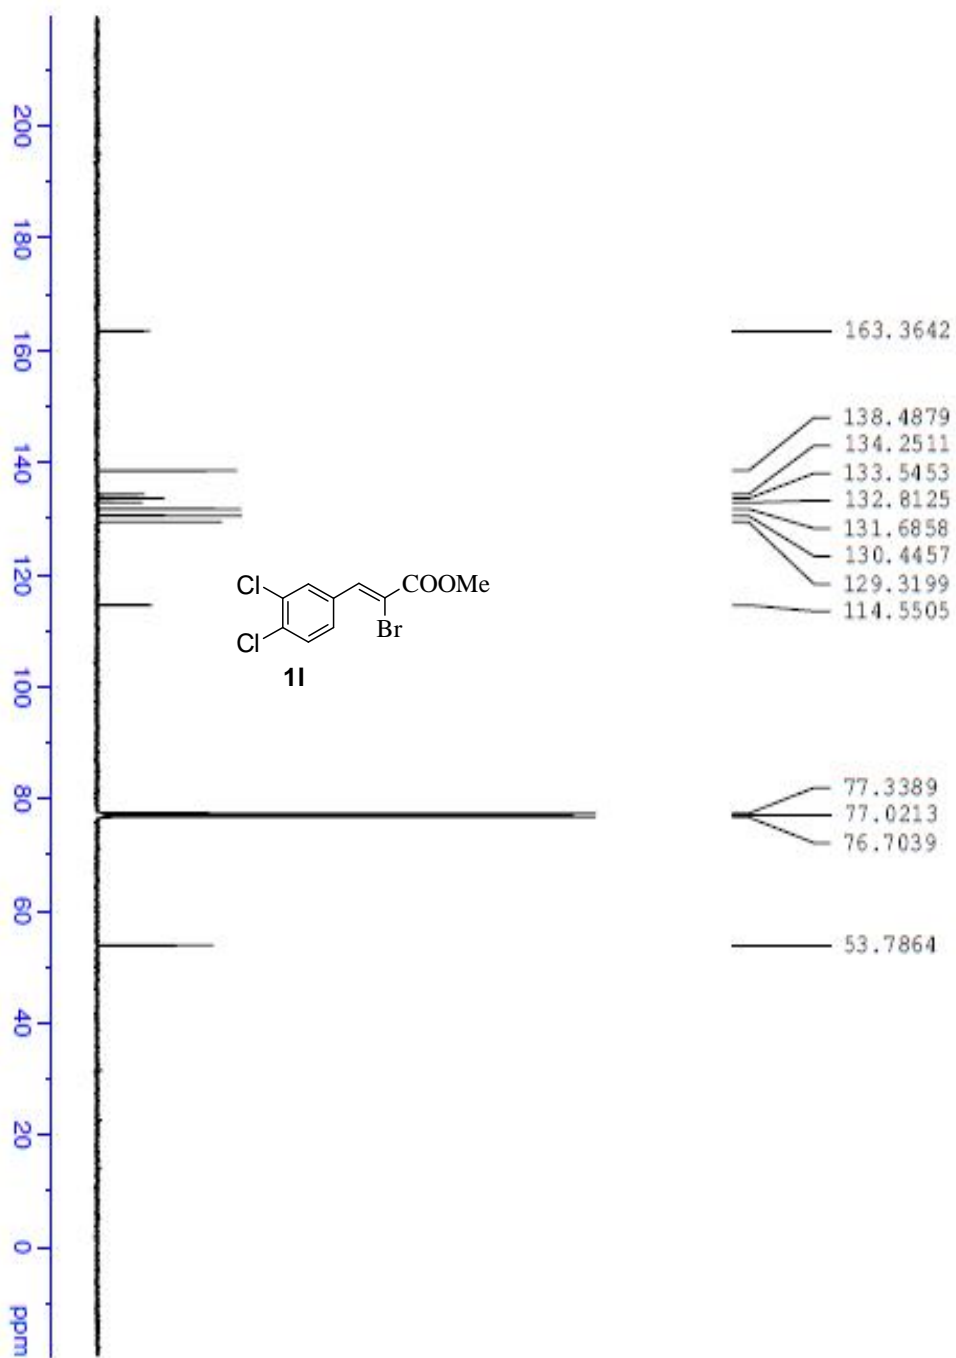

$^{13}\text{C}$  NMR (100 MHz) in  $\text{CDCl}_3$  (**11**)

Method info : A:0.1%TFA in H2O, B:0.1%TFA in ACN, Flow Rate:2.0ml/min  
 COLUMN: XBridge C8(50X4.6)mm,3.5µm

| Time | % of B |
|------|--------|
| 0    | 5      |
| 8.0  | 100    |
| 8.1  | 100    |
| 8.5  | 5      |
| 10.0 | 5      |

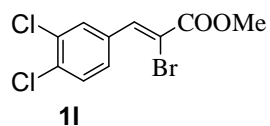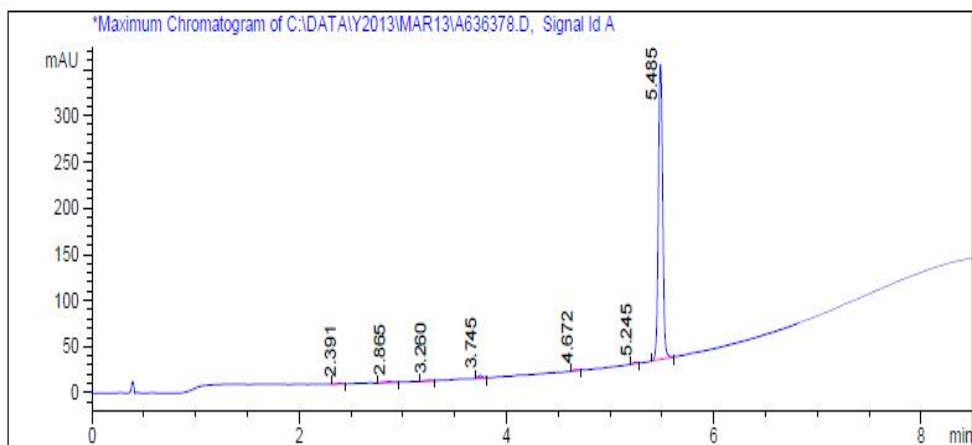

| Peak No | RT min | Area        | Area % |
|---------|--------|-------------|--------|
| 1       | 12.391 | 13.954e+000 | 0.40   |
| 2       | 12.865 | 17.417e+000 | 0.76   |
| 3       | 13.260 | 13.990e+000 | 0.41   |
| 4       | 13.745 | 18.718e+000 | 0.89   |
| 5       | 14.672 | 13.873e+000 | 0.40   |
| 6       | 15.245 | 14.446e+000 | 0.45   |
| 7       | 15.485 | 19.456e+002 | 96.69  |

HPLC (11)

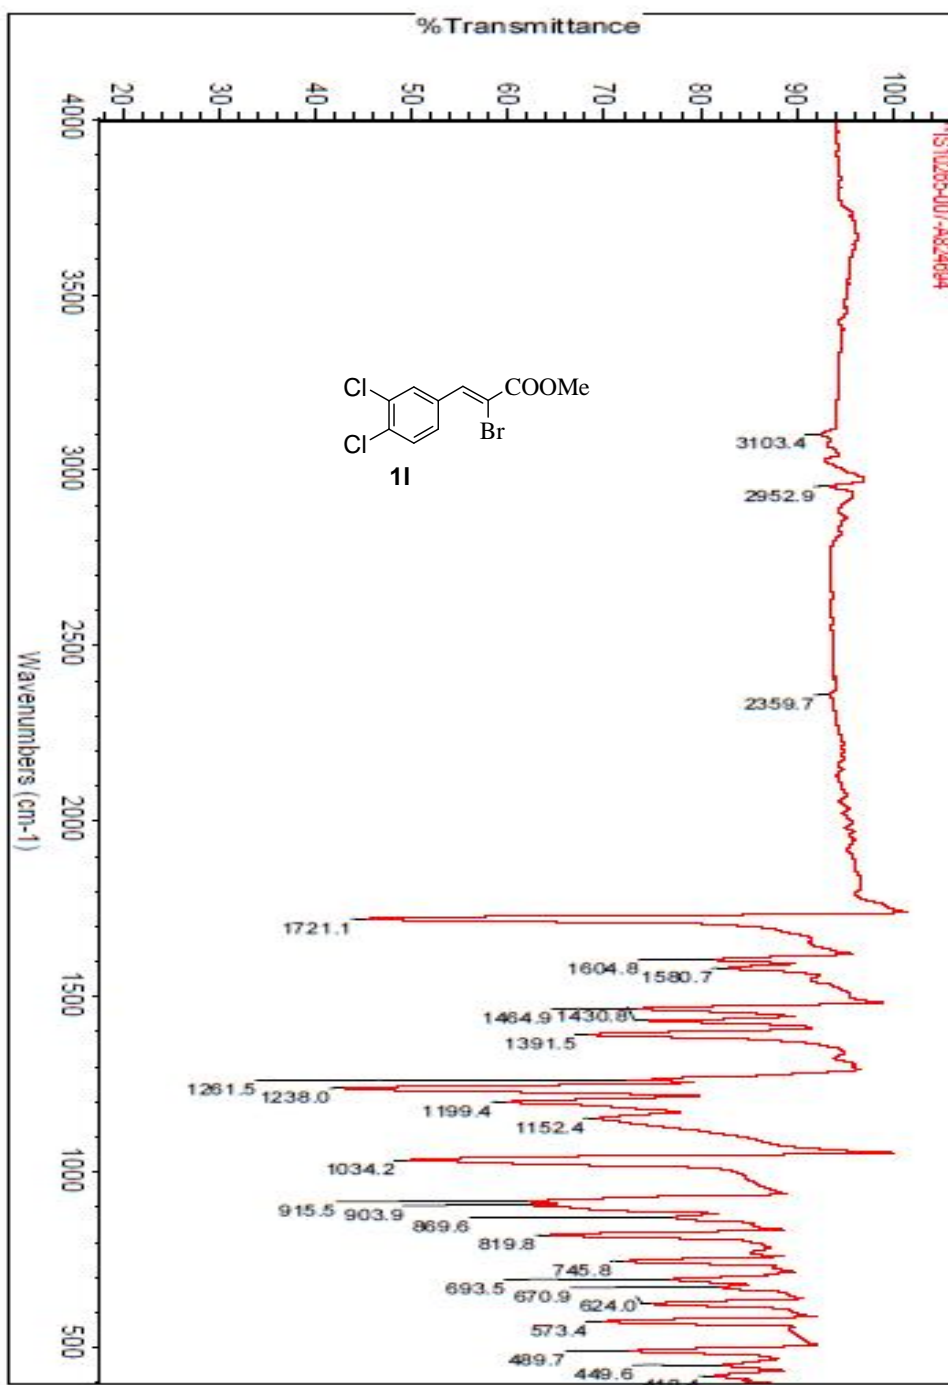

IR (**11**)

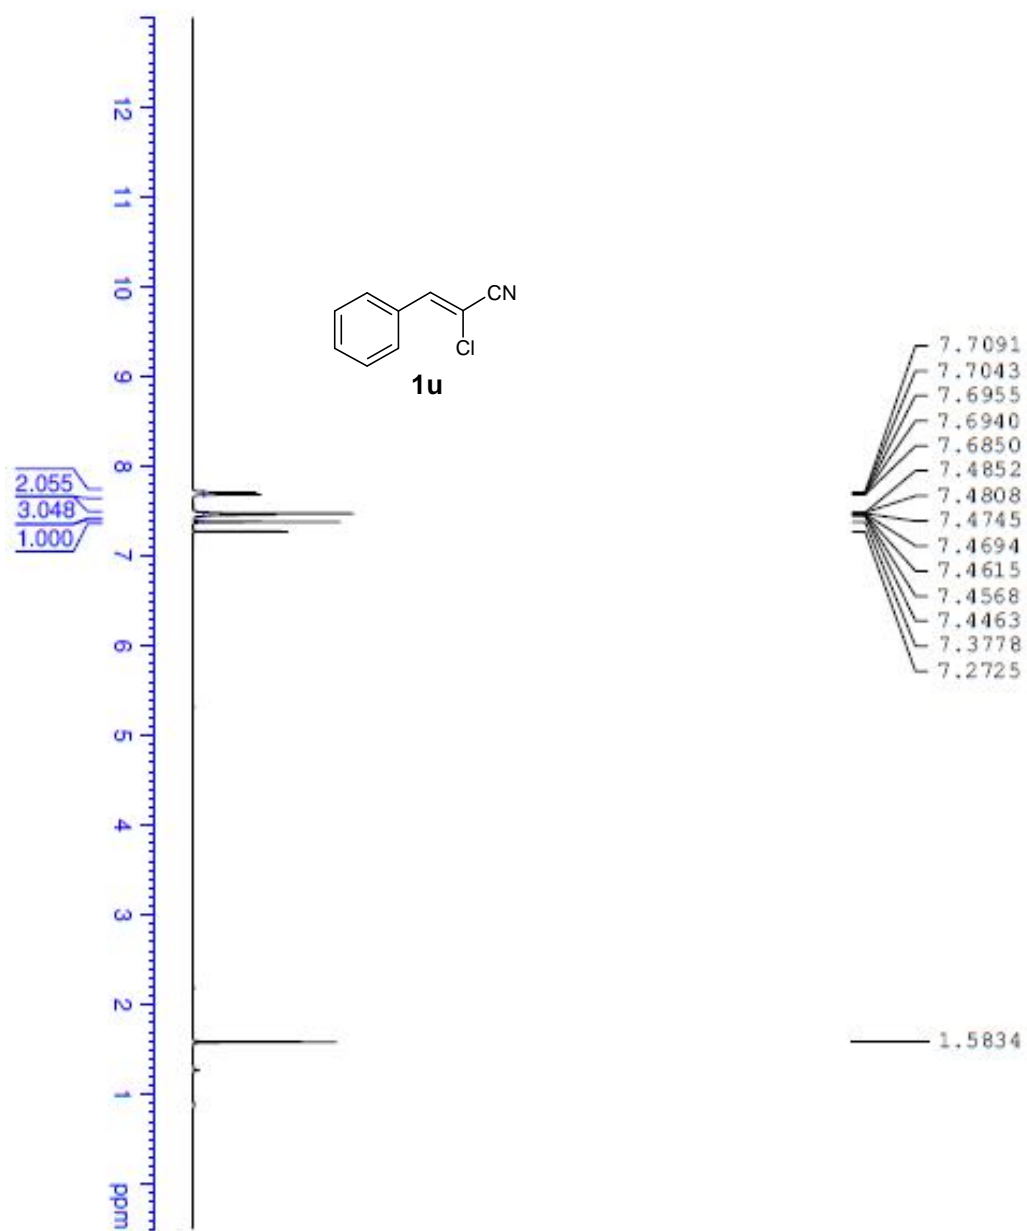

$^1\text{H}$  NMR (400 MHz) in  $\text{CDCl}_3$  (**1u**)

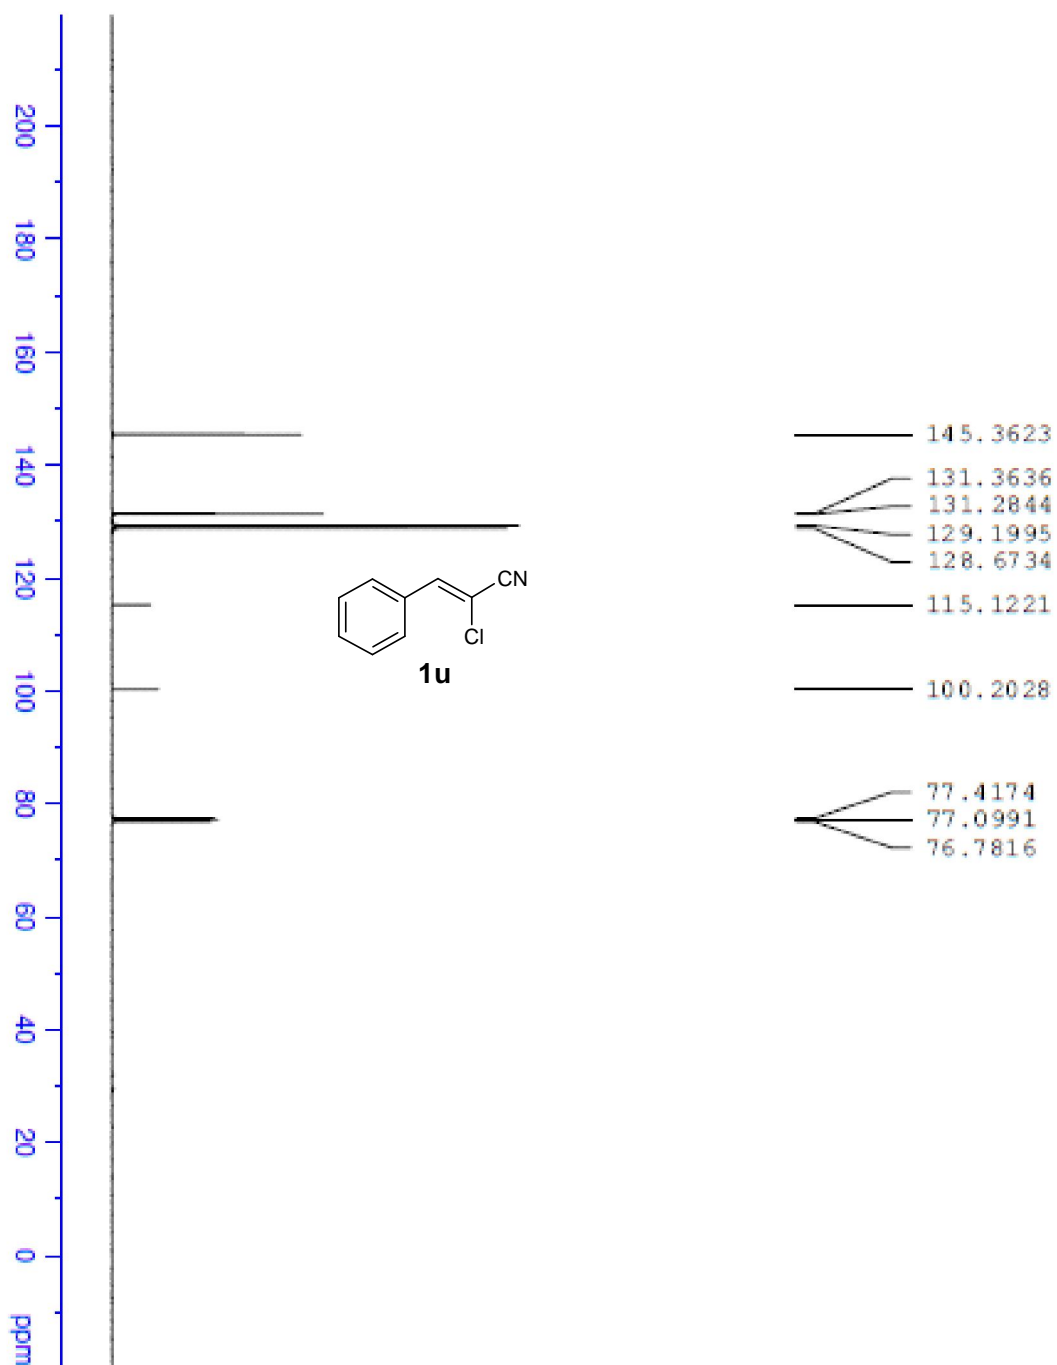

$^{13}\text{C}$  NMR (100 MHz) in  $\text{CDCl}_3$  (**1u**)

Method info : A:0.1%TFA in H2O, B:0.1%TFA in ACN, Flow Rate:2.0ml/min  
 COLUMN: XBridge C8 (50X4.6)mm,3.5µm

| Time | % of B |
|------|--------|
| 0    | 5      |
| 8.0  | 100    |
| 8.1  | 100    |
| 8.5  | 5      |
| 10.0 | 5      |

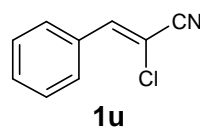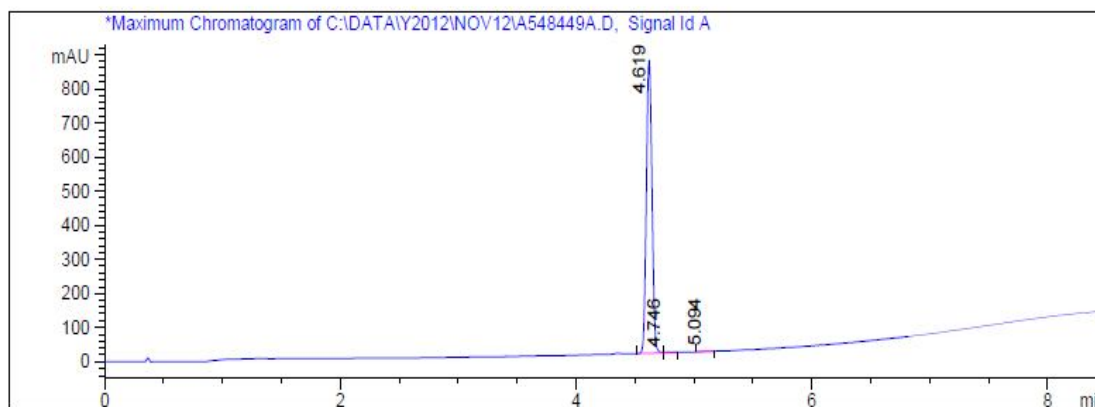

| Peak No | RT min | Area       | Area % |
|---------|--------|------------|--------|
| 1       | 4.619  | 2.922e+003 | 99.73  |
| 2       | 4.746  | 4.383e+000 | 0.15   |
| 3       | 5.094  | 3.465e+000 | 0.12   |

## HPLC (1u)



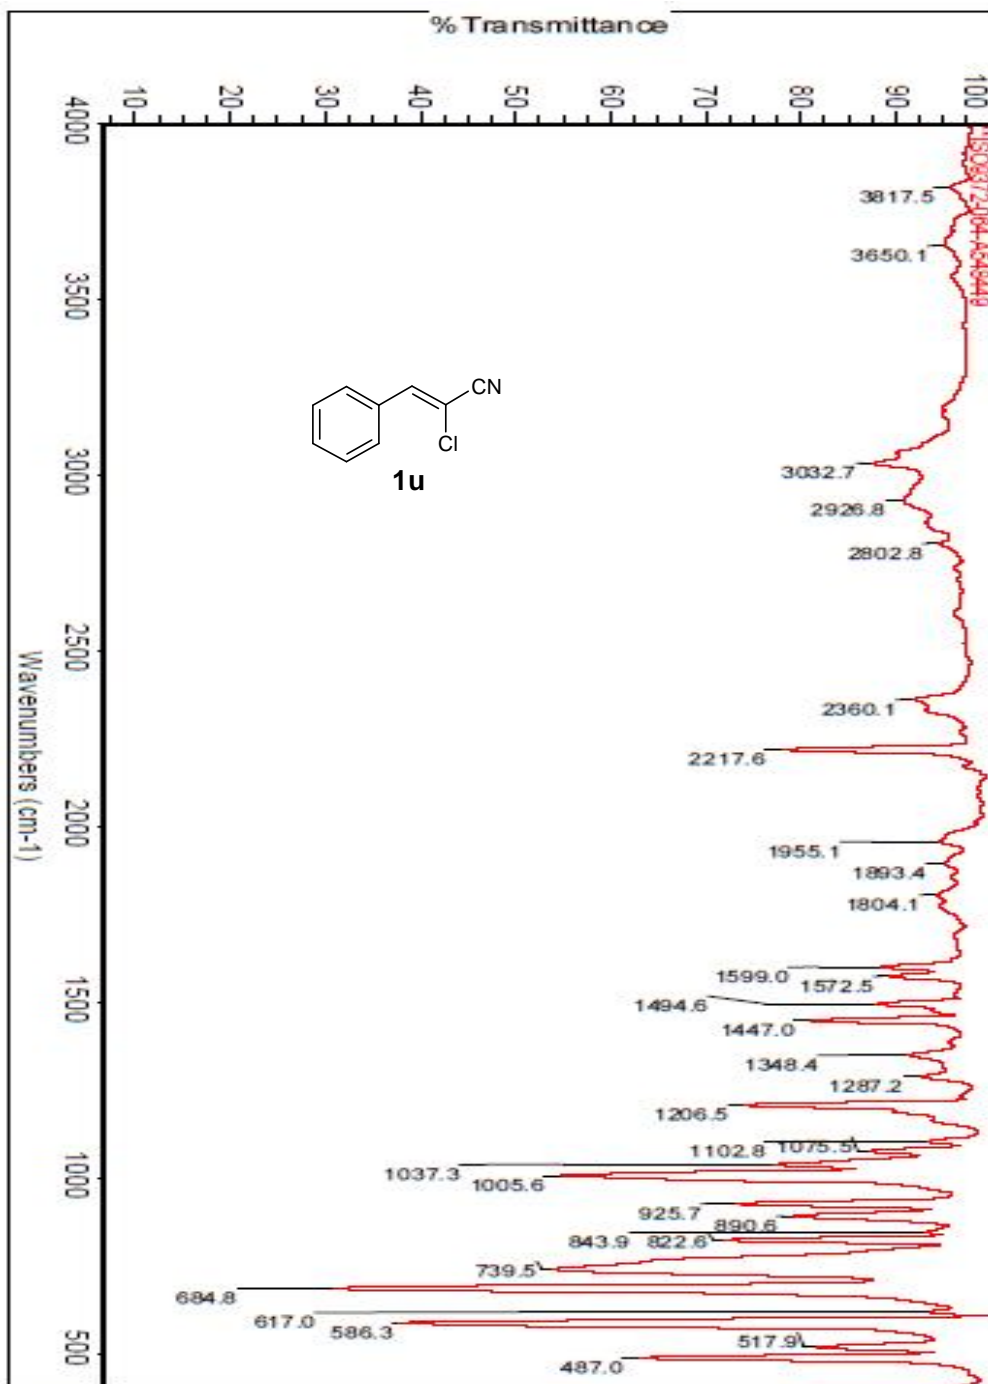

IR (**1u**)

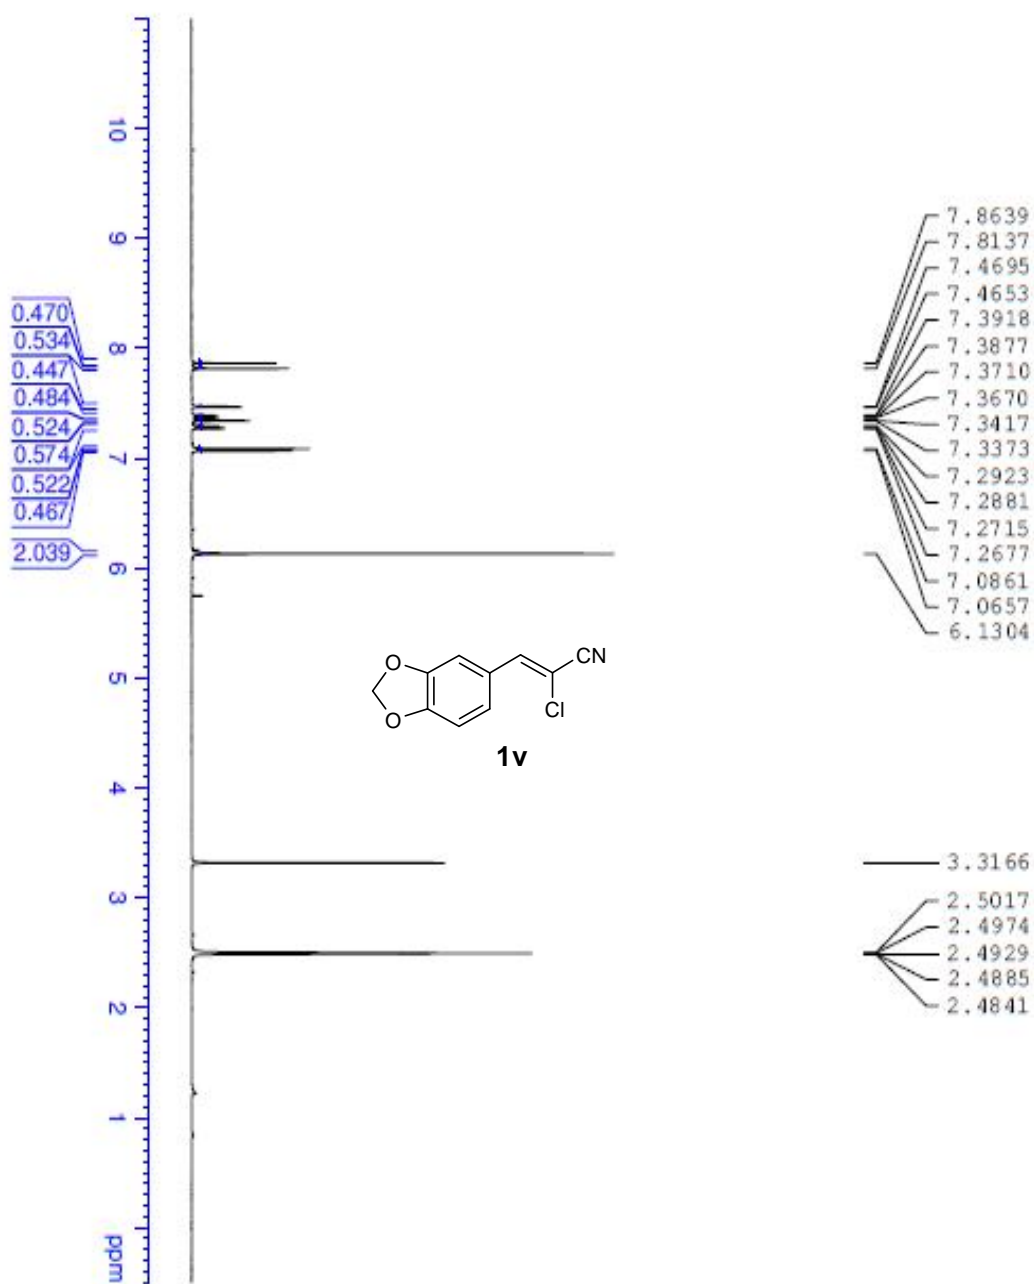

<sup>1</sup>H NMR (400 MHz) in DMSO-*d*<sub>6</sub> (**1v**)

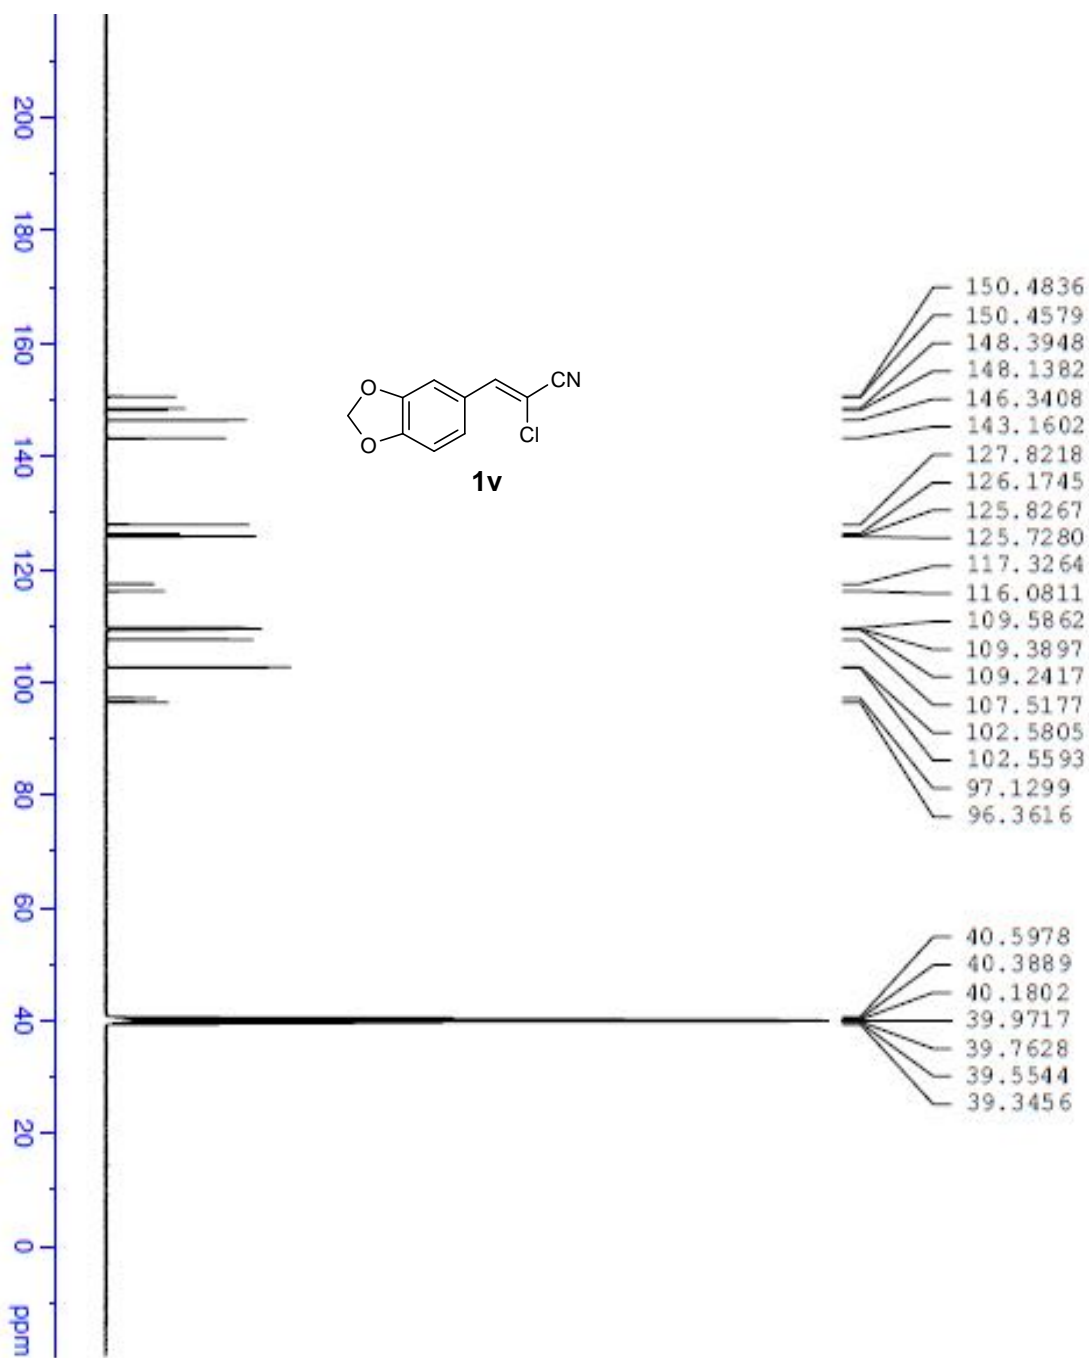

$^{13}\text{C}$  NMR (100 MHz) in  $\text{DMSO-}d_6$  (**1v**)

Method info :

A-10mM NH<sub>4</sub>HCO<sub>3</sub> IN H<sub>2</sub>O , B- ACN Flow: 1.0 ml/min  
COLUMN: XBridge C8 (50X4.6mm, 3.5μm),

| TIME | %B  |
|------|-----|
| 0    | 05  |
| 8.0  | 100 |
| 8.1  | 100 |
| 8.5  | 05  |
| 10   | 05  |

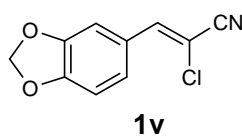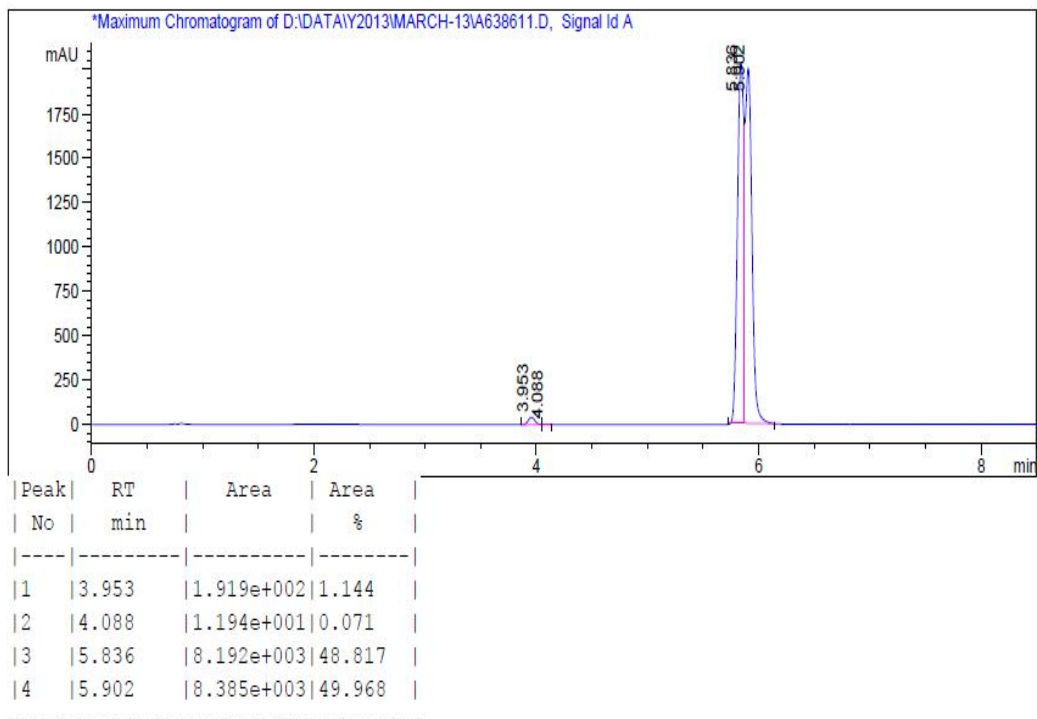

HPLC (1v)

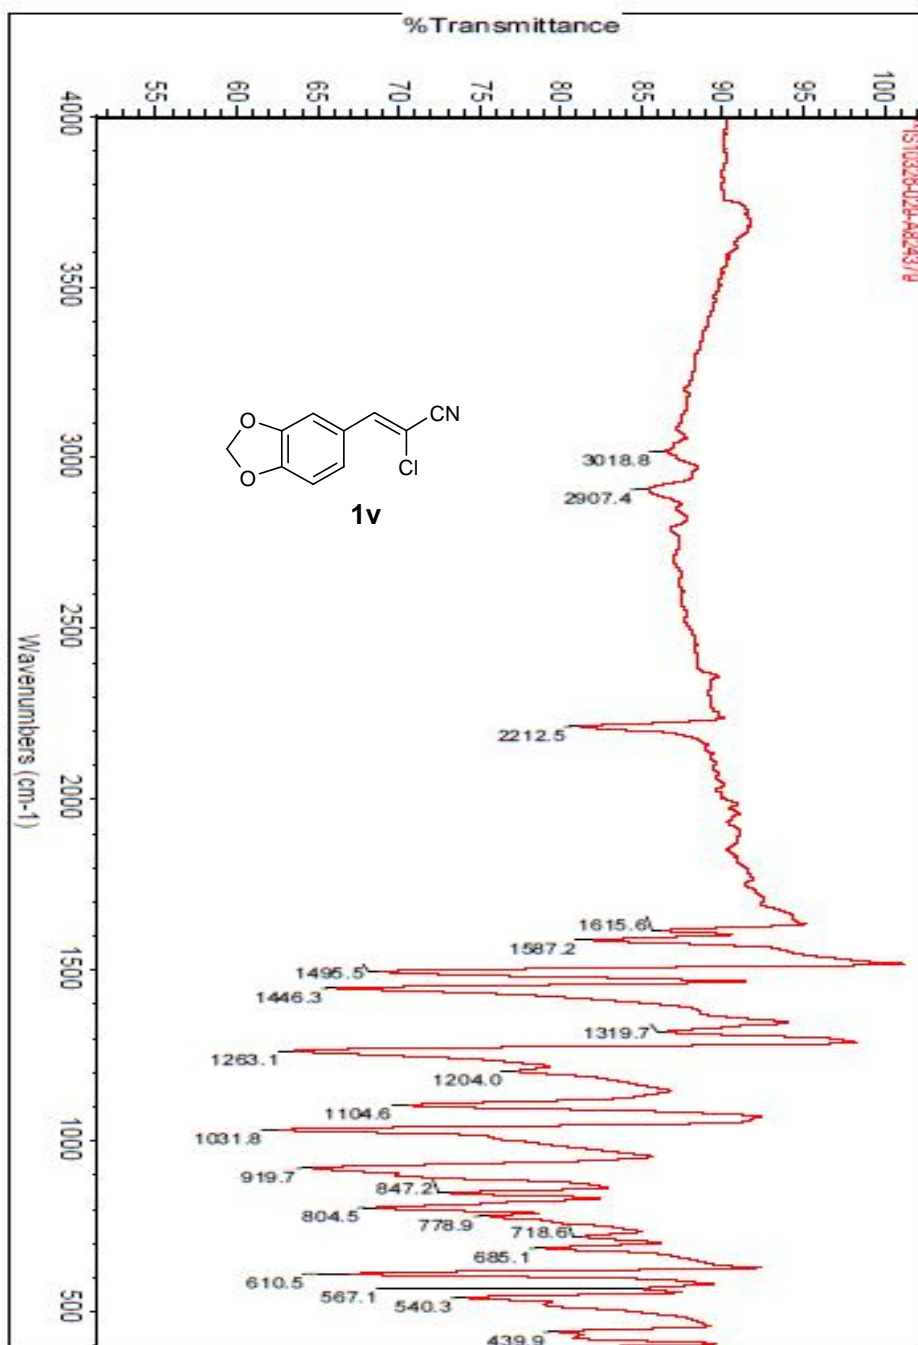

IR (**1v**)

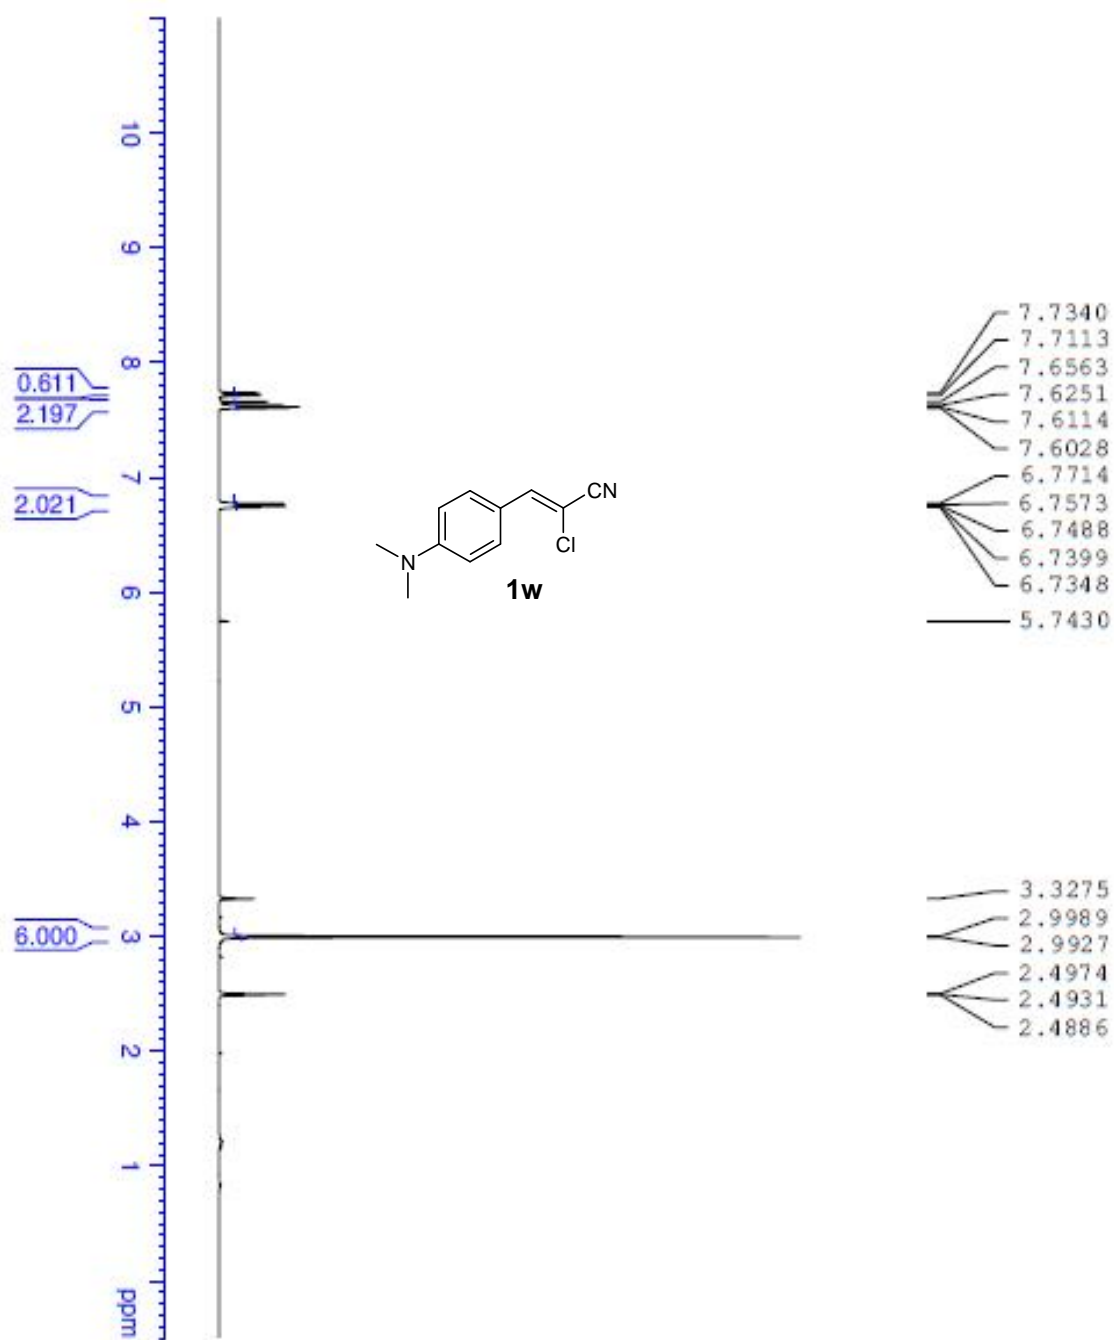

$^1\text{H NMR}$  (400 MHz) in  $\text{DMSO-}d_6$  (**1w**)

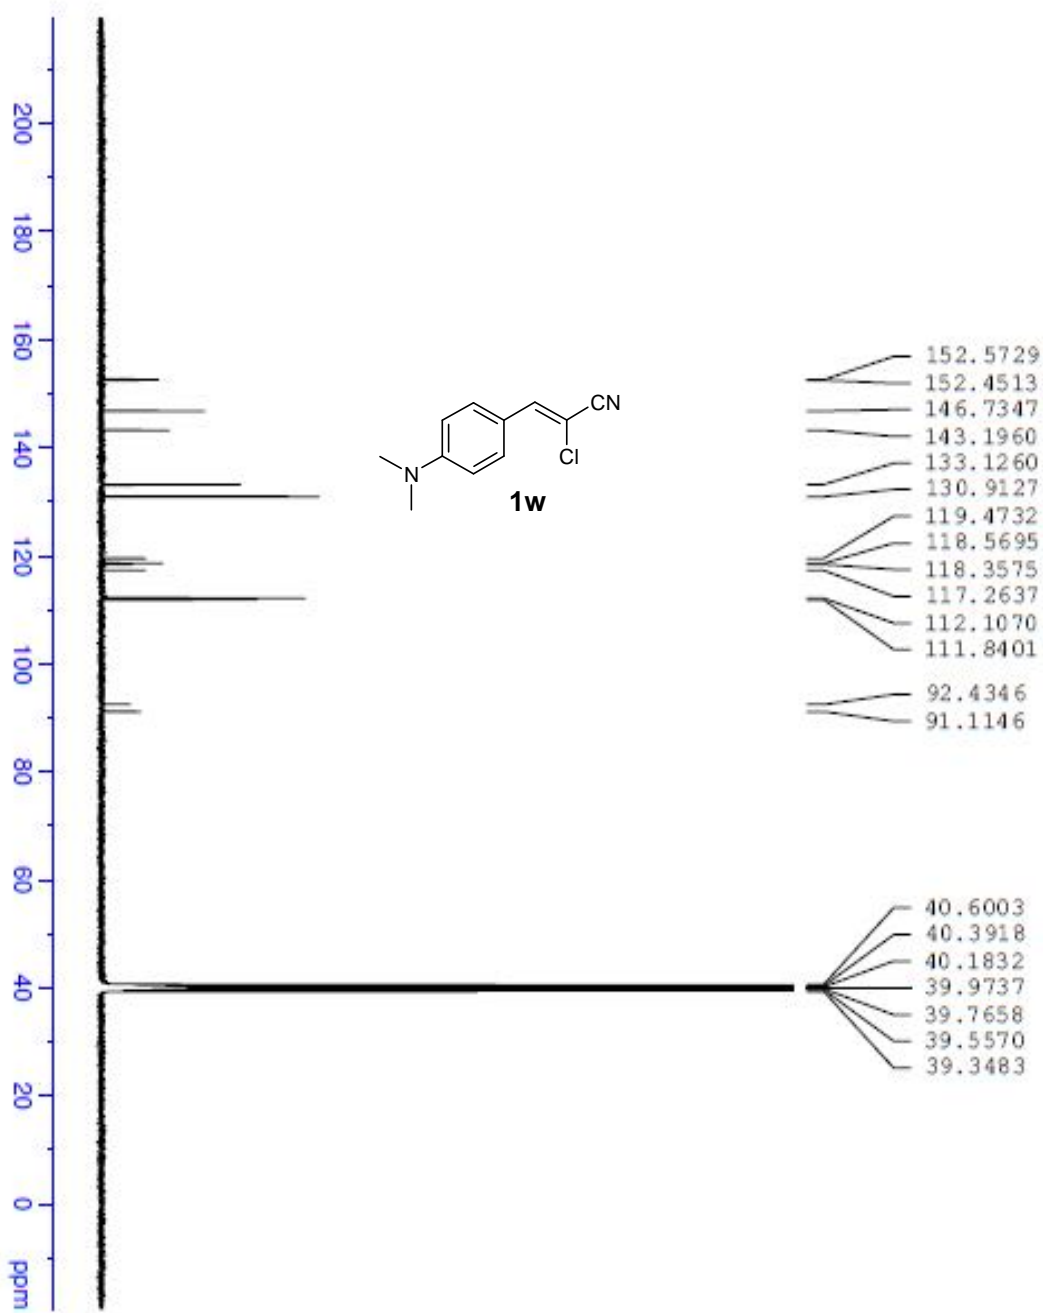

<sup>13</sup>C NMR (100 MHz) in DMSO-*d*<sub>6</sub> (**1w**)

Method info : A: 0.1% TFA IN H2O , B:0.1% TFA IN ACN ; Flow Rate:2.0 ml/min  
 COLUMN:XBridge C8 (50x4.6mm, 3.5µm), +ve mode

| TIME | %B  |
|------|-----|
| 0    | 05  |
| 8.0  | 100 |
| 8.1  | 100 |
| 8.5  | 05  |
| 10   | 05  |

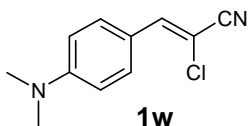

->

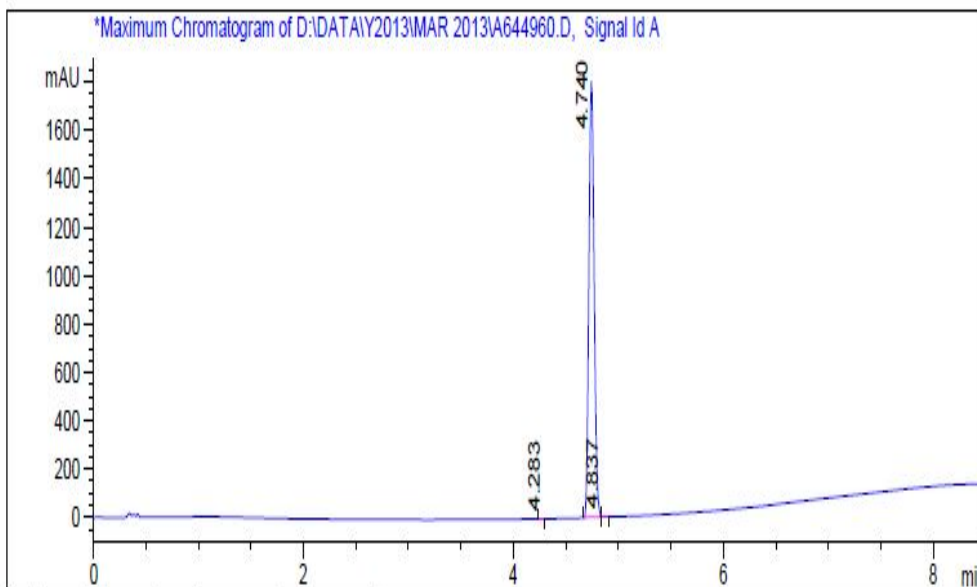

| Peak No | RT min | Area       | Area % |
|---------|--------|------------|--------|
| 1       | 4.283  | 2.539e+000 | 0.040  |
| 2       | 4.740  | 6.281e+003 | 99.886 |
| 3       | 4.837  | 4.603e+000 | 0.073  |

HPLC (1w)



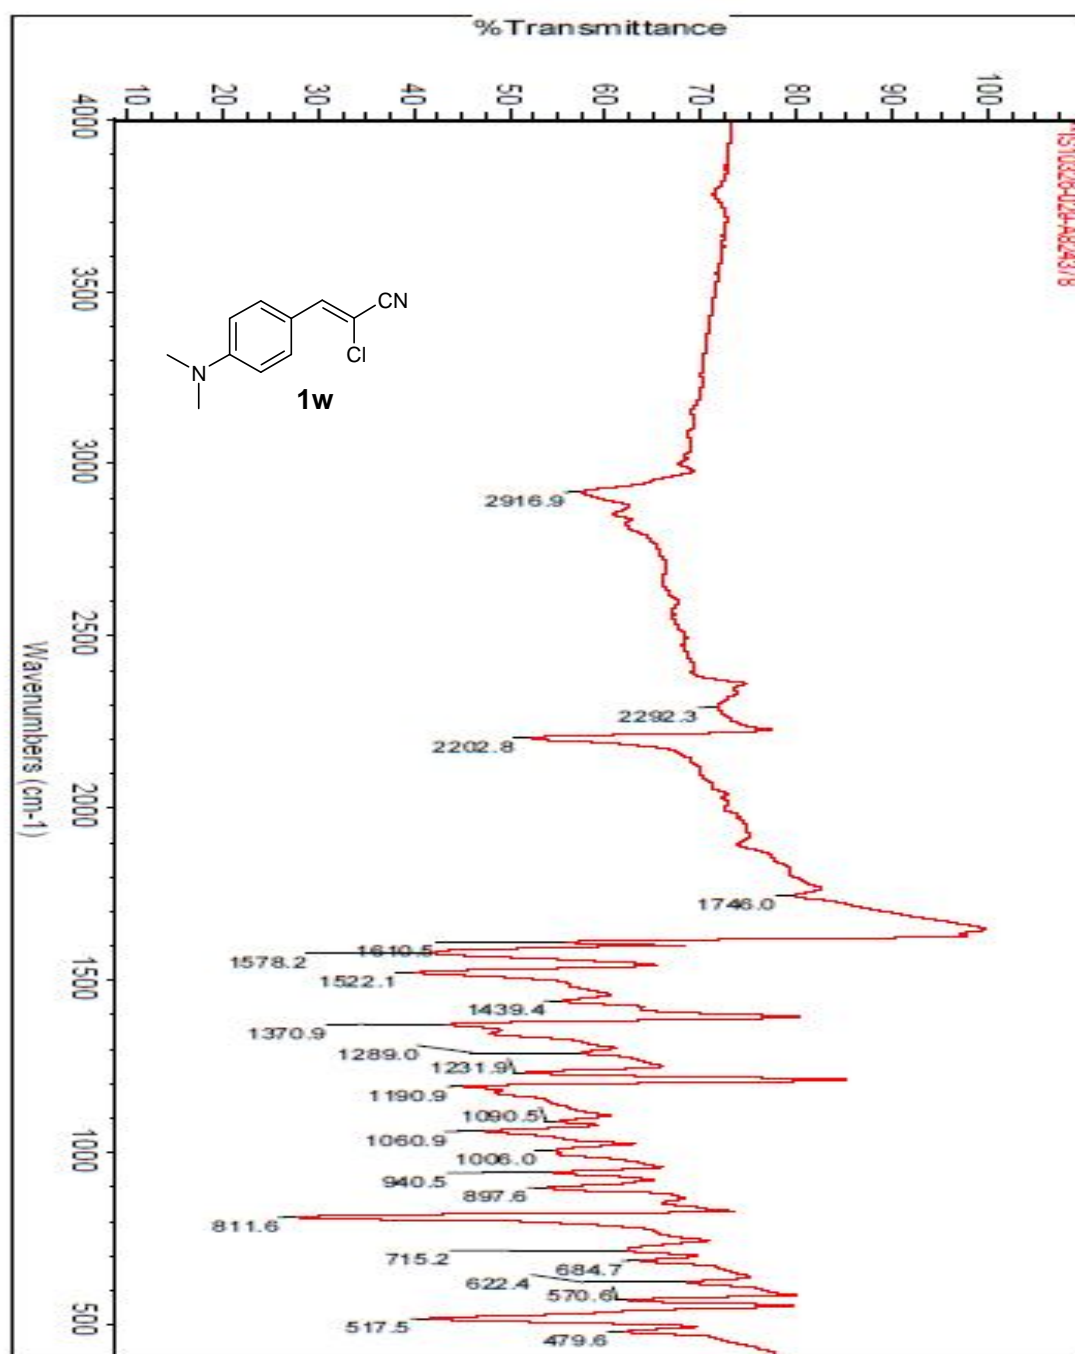

IR (**1w**)

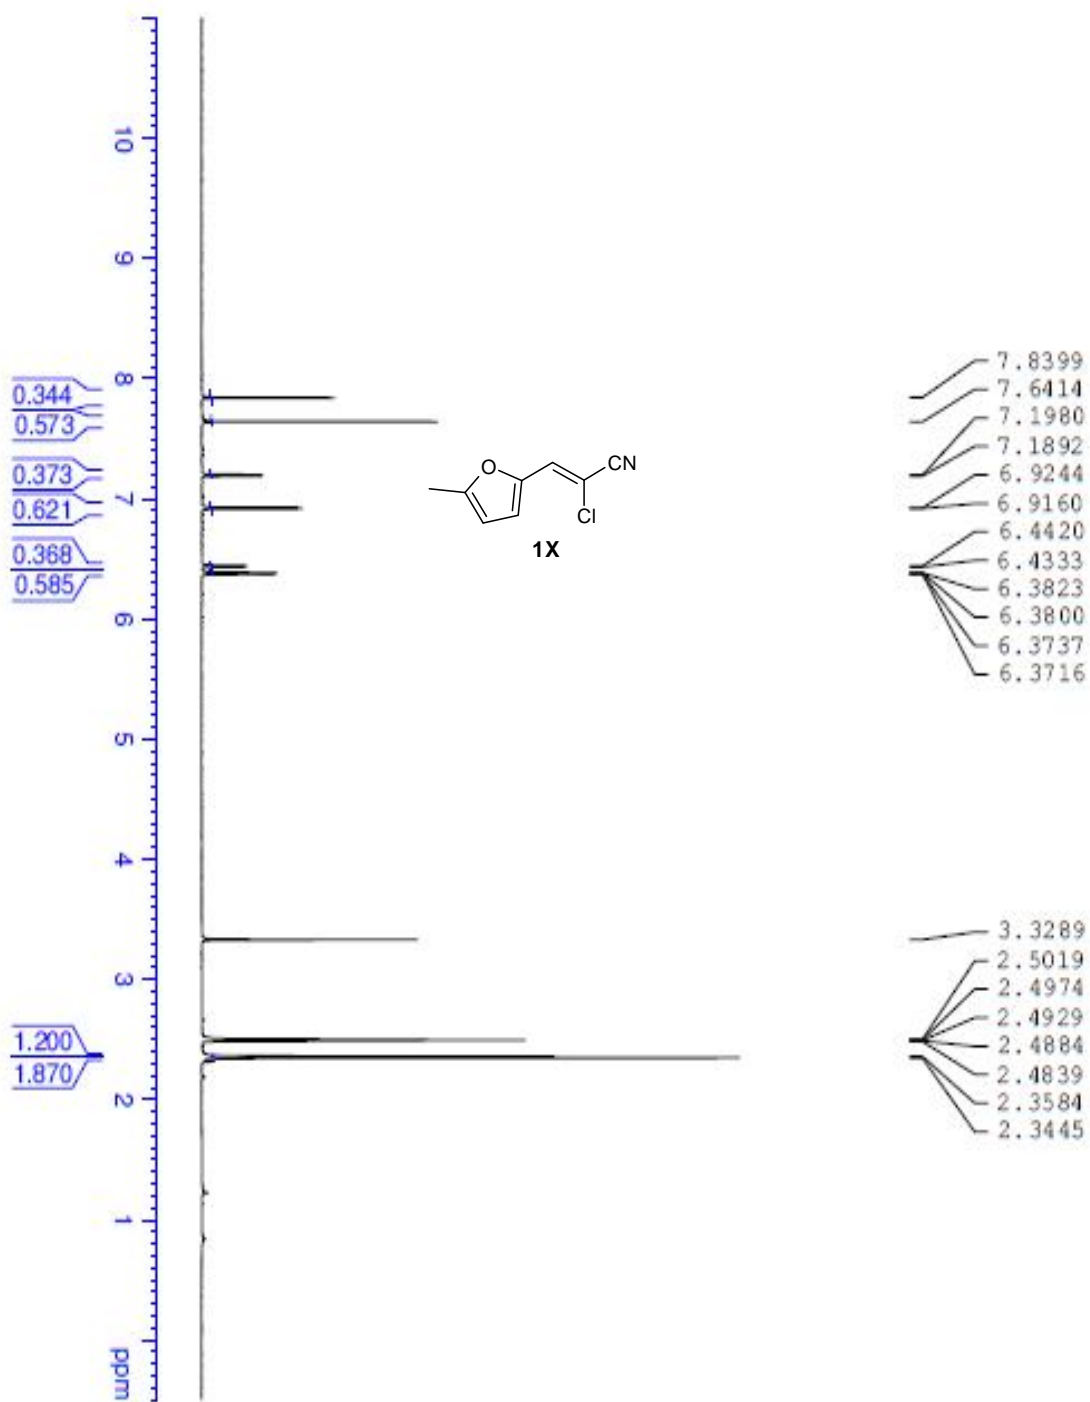

<sup>1</sup>H NMR (400 MHz) in DMSO-*d*<sub>6</sub> (**1x**)

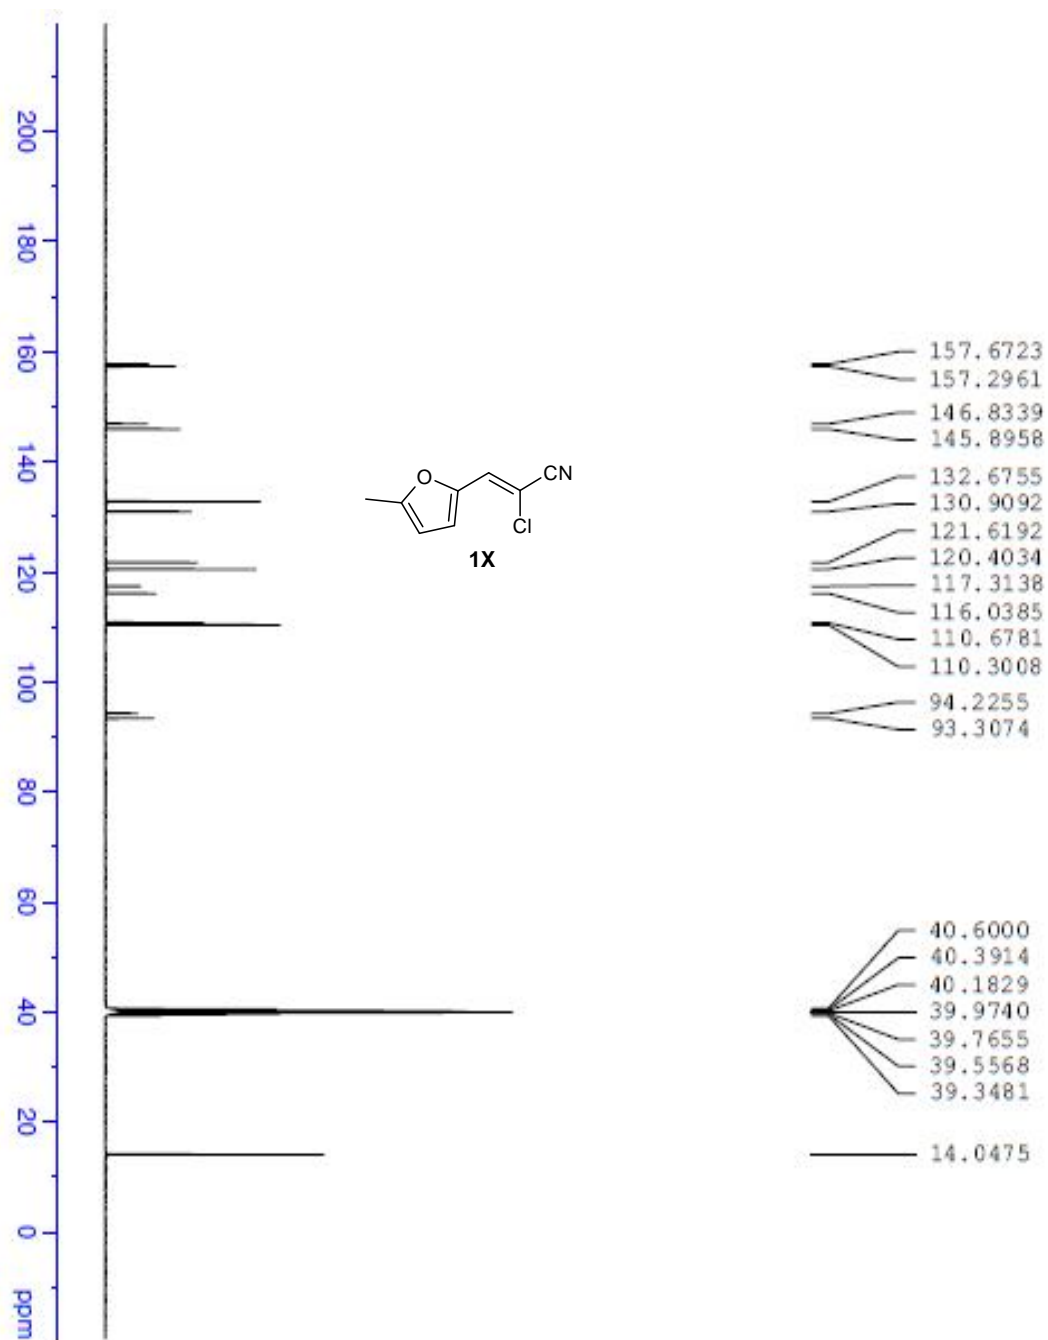

<sup>13</sup>C NMR (100 MHz) in DMSO-*d*<sub>6</sub> (**1x**)

Method Info : A : 10 mM NH<sub>4</sub>HCO<sub>3</sub> H<sub>2</sub>O B: ACN Flow = 1.0 mL/min  
 COLUMN:XBridge C8 (50X4.6)mm,3.5µm , -ve mode

| Time | % of B |
|------|--------|
| 0    | 5      |
| 8.0  | 100    |
| 8.1  | 100    |
| 8.5  | 5      |
| 10.0 | 5      |

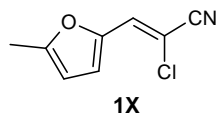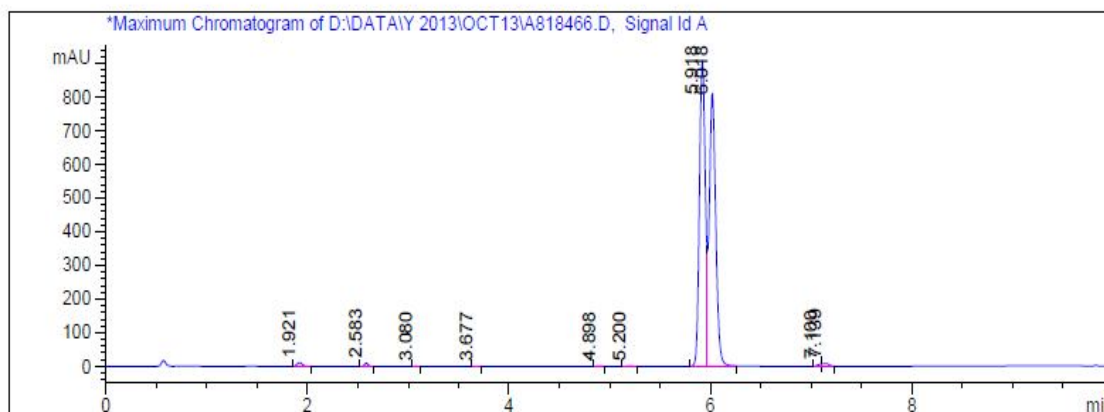

| Peak No | RT min | Area      | Area %  |
|---------|--------|-----------|---------|
| 1       | 1.921  | 41.158    | 0.554   |
| 2       | 2.583  | 126.143   | 0.352   |
| 3       | 3.080  | 12.859    | 0.038   |
| 4       | 3.677  | 12.271    | 0.031   |
| 5       | 4.898  | 19.259    | 0.125   |
| 6       | 5.200  | 10.507    | 0.141   |
| 7       | 5.918  | 13692.588 | 149.680 |
| 8       | 6.018  | 13587.146 | 148.262 |
| 9       | 7.100  | 120.121   | 0.271   |
| 10      | 7.139  | 140.653   | 0.547   |

### HPLC (1x)

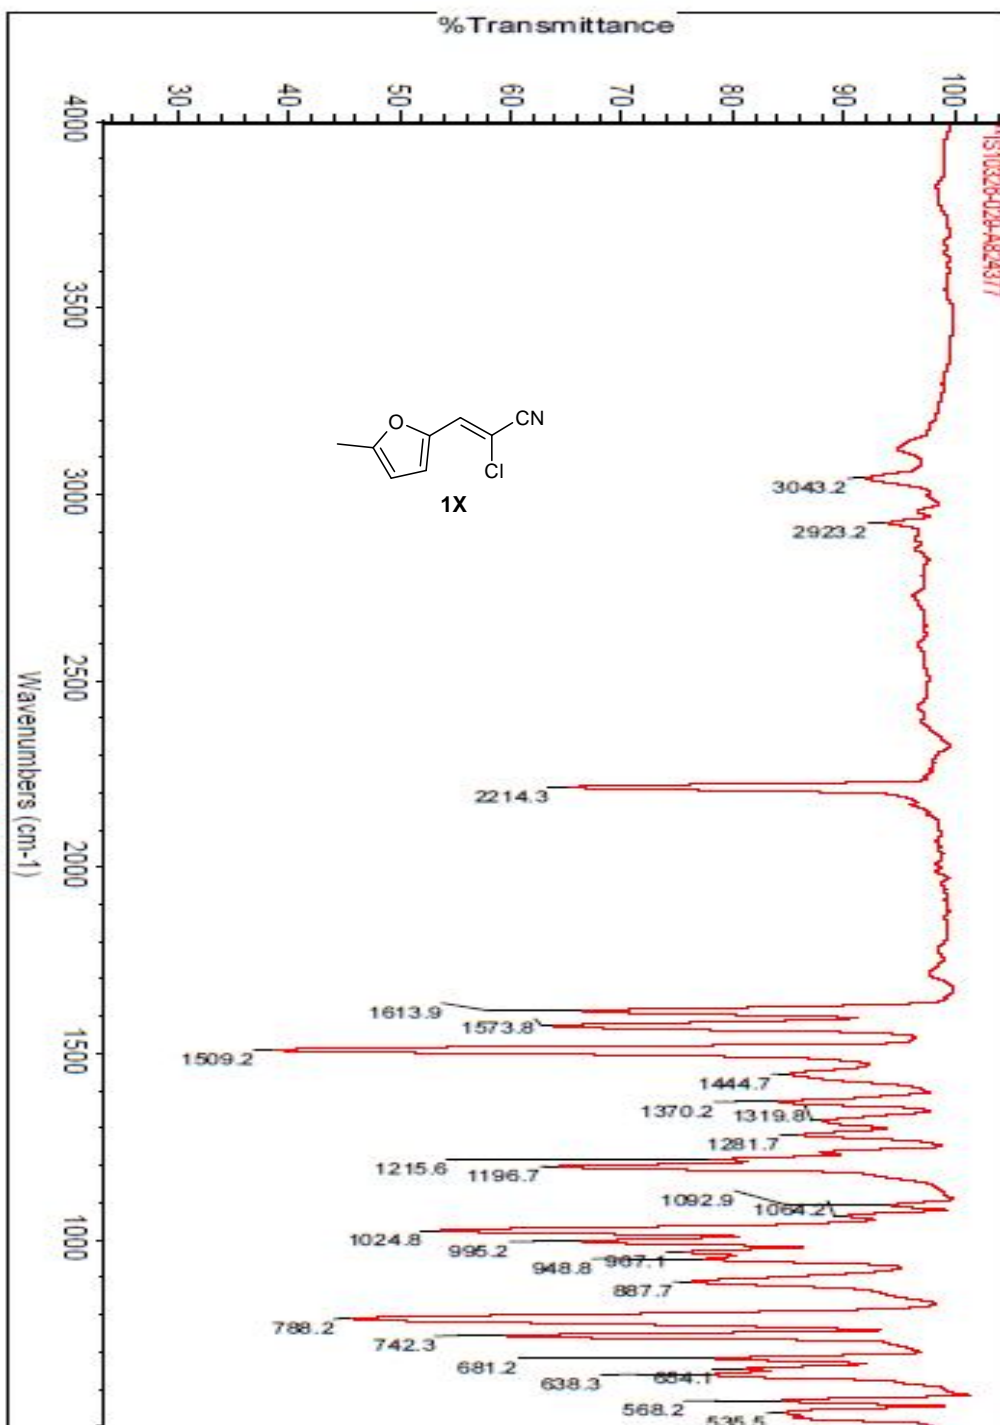

IR (1x)

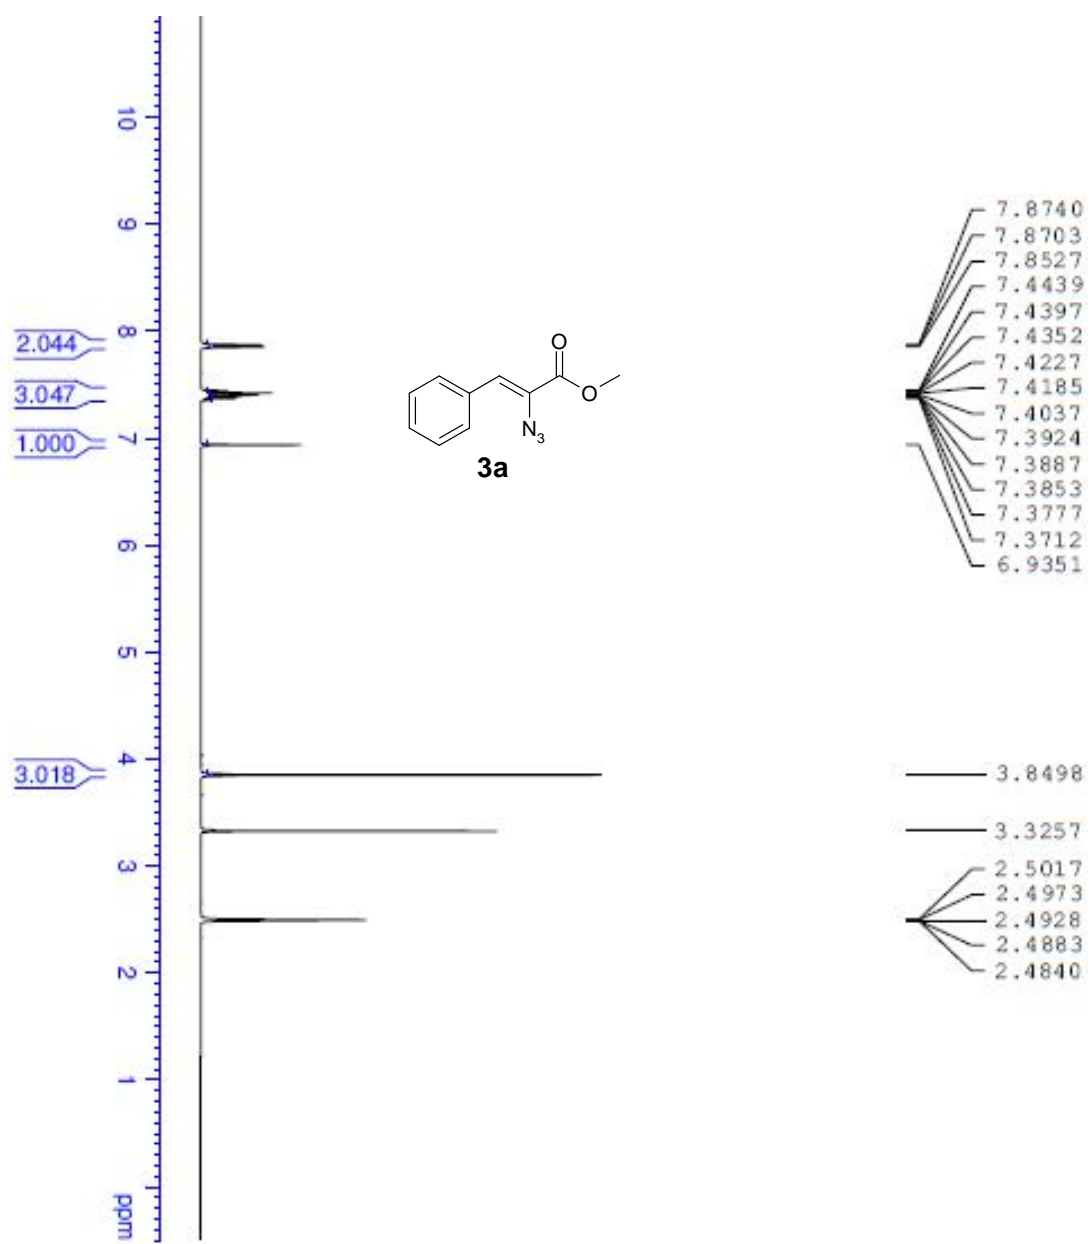

<sup>1</sup>H NMR (400 MHz) in DMSO-*d*<sub>6</sub> (**3a**)

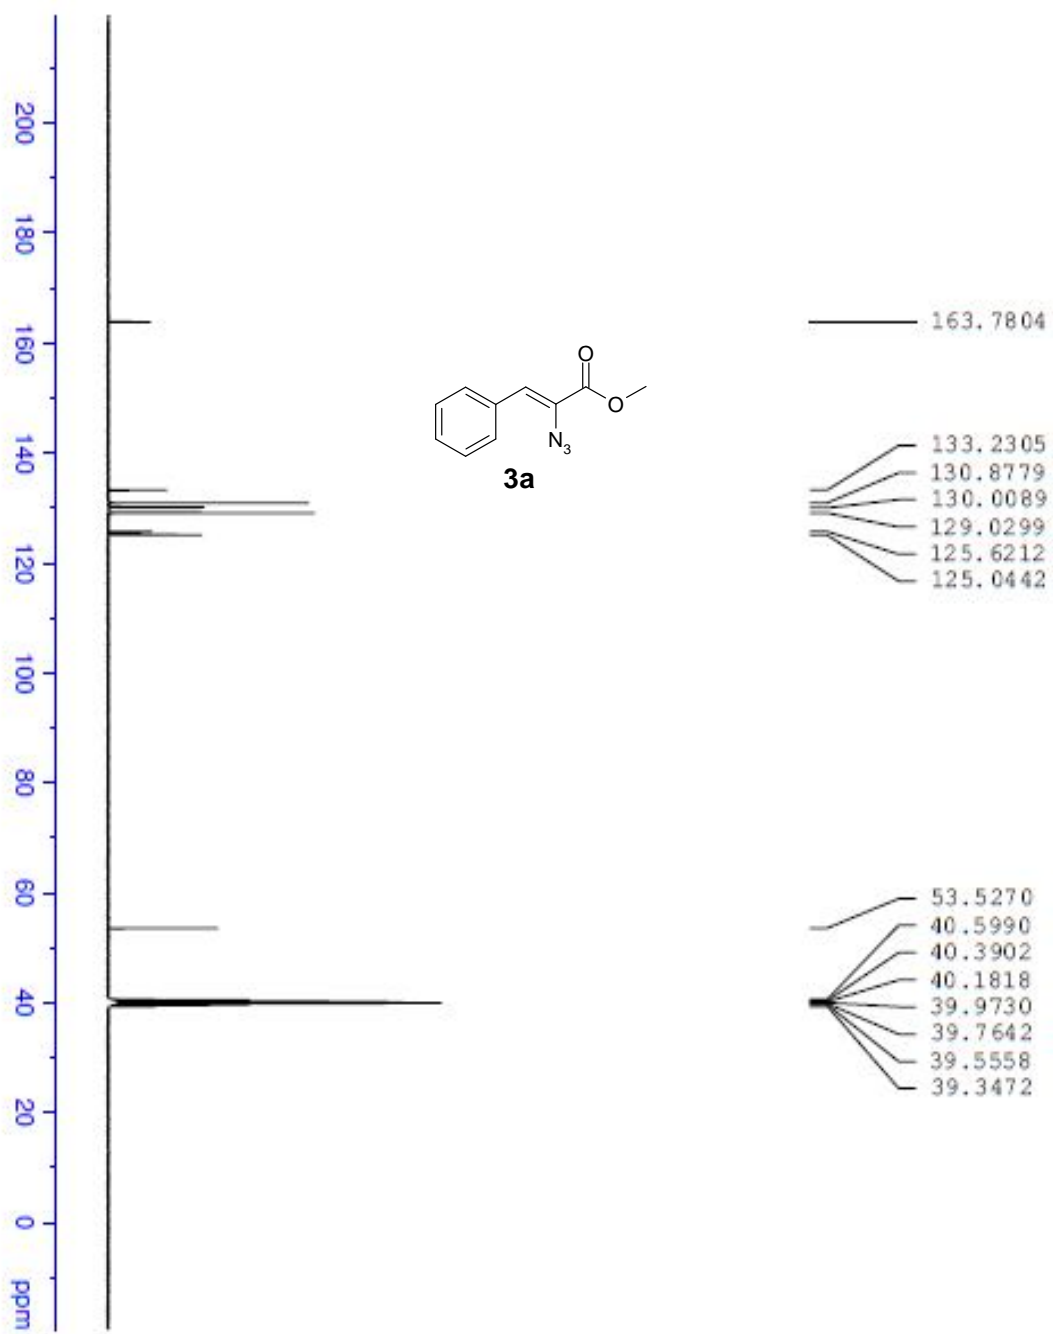

$^{13}\text{C}$  NMR (100 MHz) in  $\text{DMSO-}d_6$  (**3a**)

Method info :

A: 0.1% TFA IN H<sub>2</sub>O , B:0.1% TFA IN ACN ; Flow Rate:2.0 ml/min  
COLUMN:XBridge C8 (50x4.6mm, 3.5µm), +ve mode

| TIME | %B  |
|------|-----|
| 0    | 05  |
| 8.0  | 100 |
| 8.1  | 100 |
| 8.5  | 05  |
| 10   | 05  |

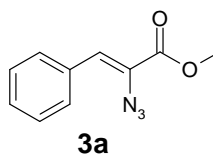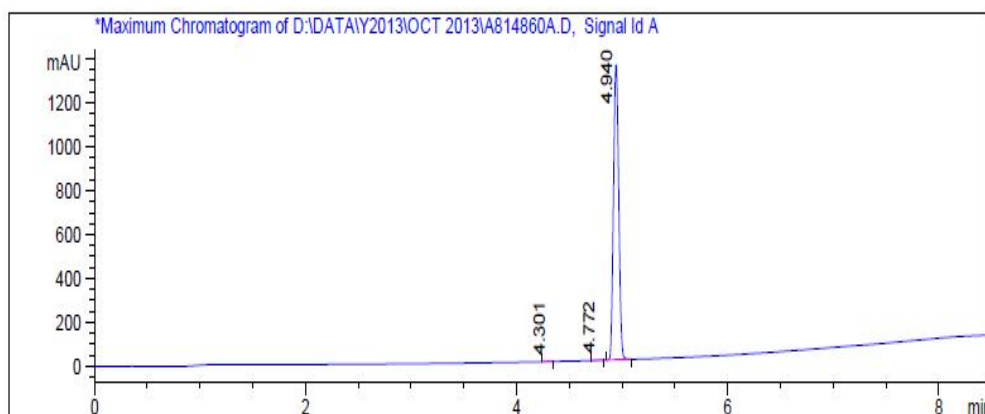

| Peak No | RT min | Area        | Area % |
|---------|--------|-------------|--------|
| 1       | 4.301  | 14.847e+000 | 0.105  |
| 2       | 4.772  | 17.952e+000 | 0.172  |
| 3       | 4.940  | 14.623e+003 | 99.724 |

HPLC (3a)



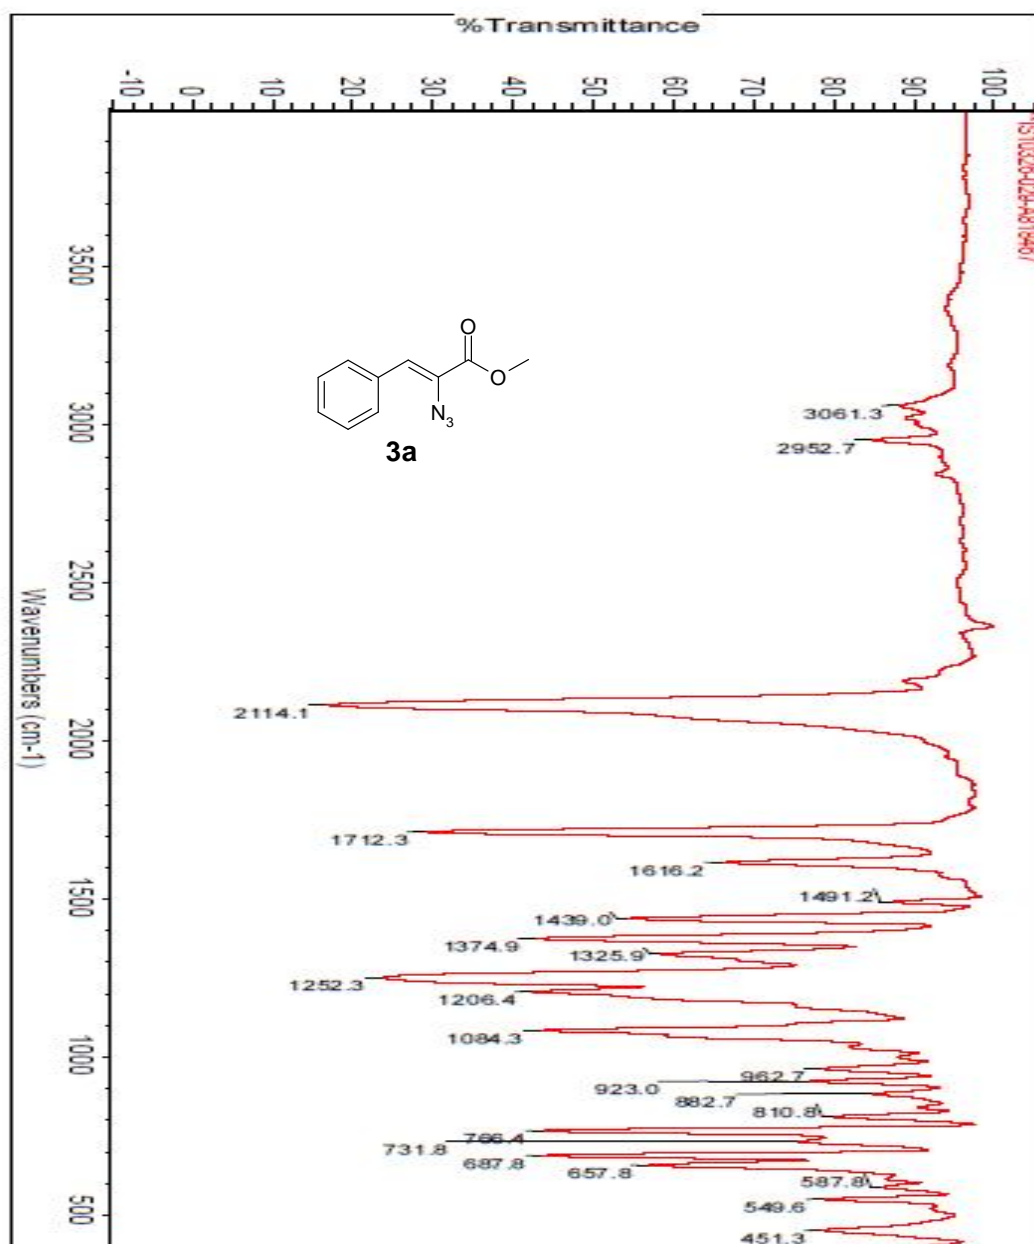

IR (**3a**)

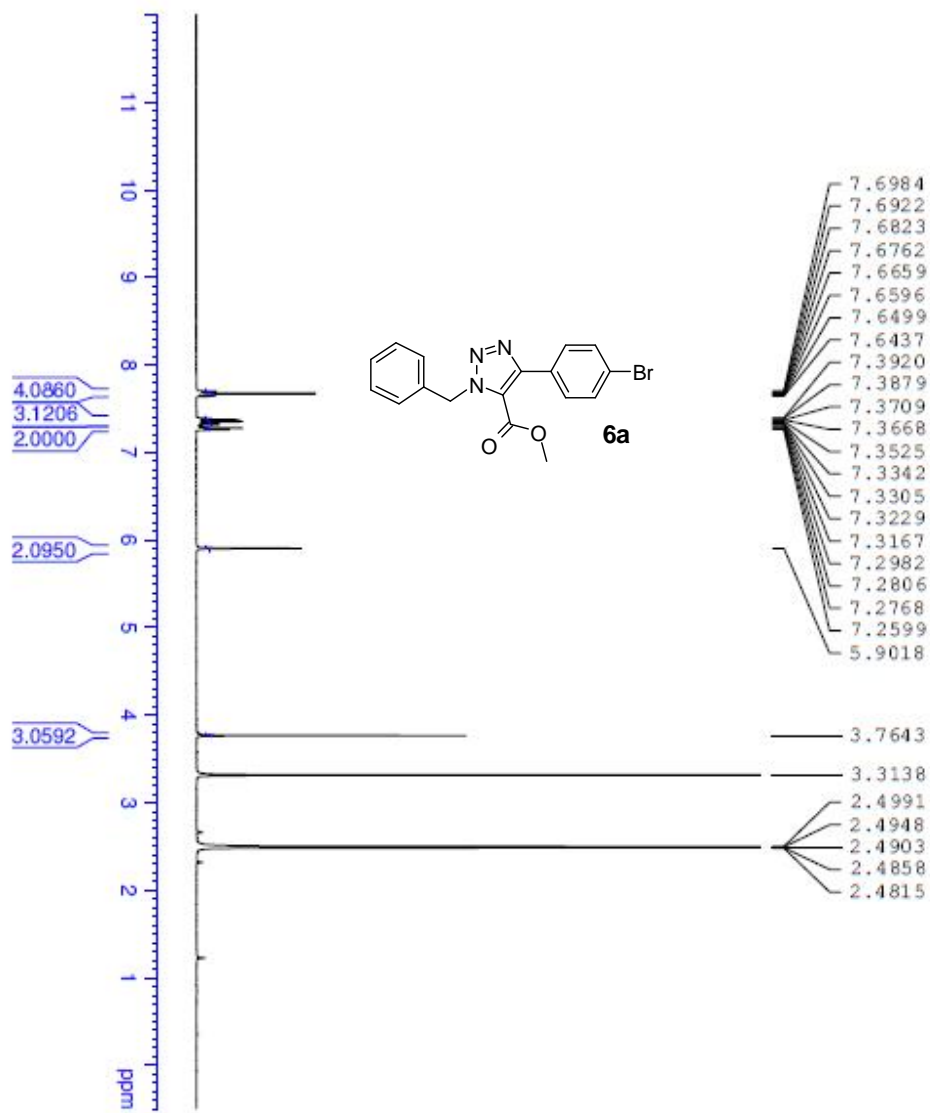

<sup>1</sup>H NMR (400 MHz) in DMSO-*d*<sub>6</sub> (**6a**)

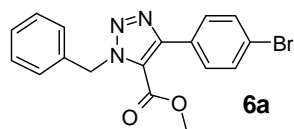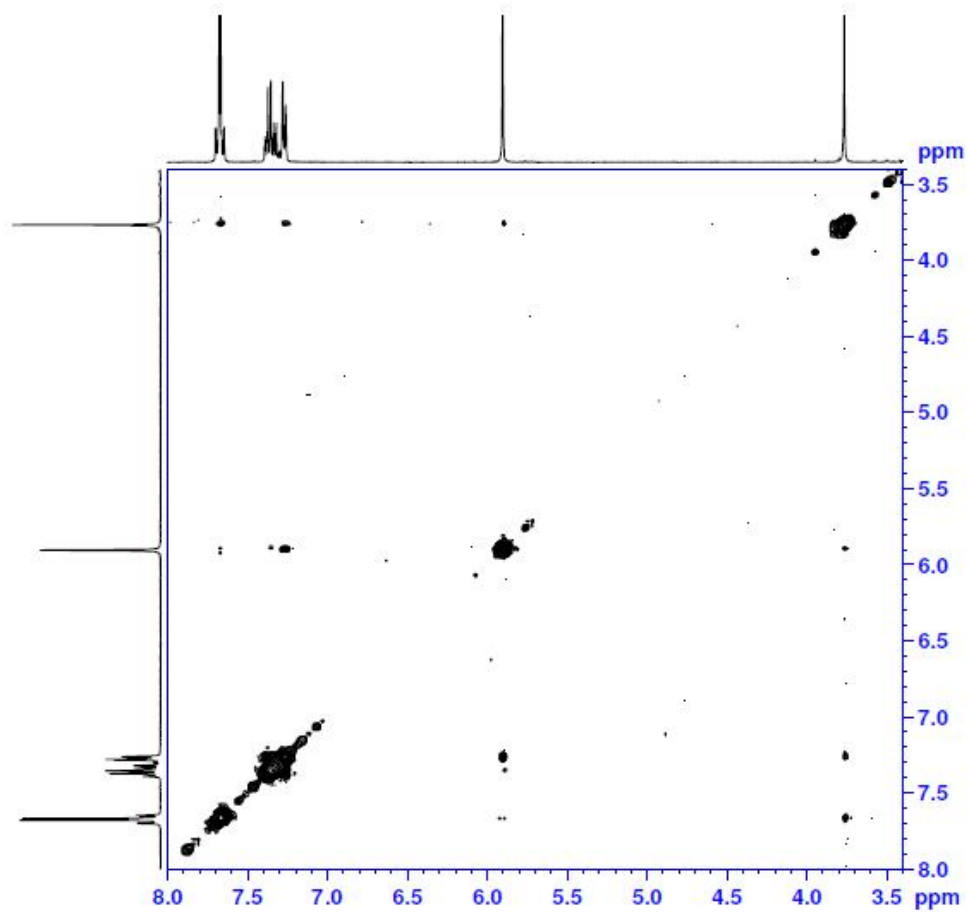

NOESY correlation (**6a**)

Method info :

A: 0.1% TFA IN H<sub>2</sub>O , B:0.1% TFA IN ACN ; Flow Rate:2.0 ml/min

COLUMN:XBridge C8 (50x4.6mm, 3.5μ), +ve mode

| TIME | %B  |
|------|-----|
| 0    | 05  |
| 8.0  | 100 |
| 8.1  | 100 |
| 8.5  | 05  |
| 10.0 | 05  |

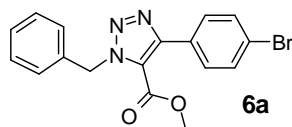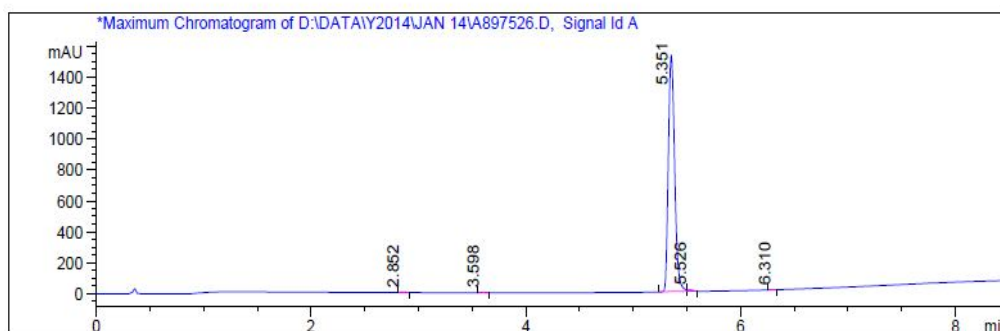

| Peak No | RT min | Area        | Area % |
|---------|--------|-------------|--------|
| 11      | 12.852 | 1.135e+001  | 0.179  |
| 12      | 13.598 | 18.230e+000 | 0.130  |
| 13      | 15.351 | 16.257e+003 | 98.916 |
| 14      | 15.526 | 13.948e+001 | 0.624  |
| 15      | 16.310 | 19.498e+000 | 0.150  |

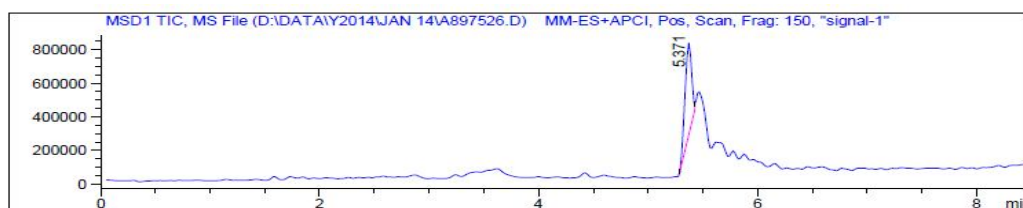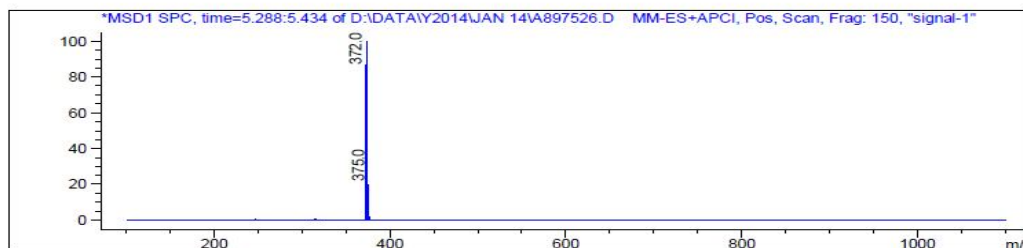

LCMS (6a)

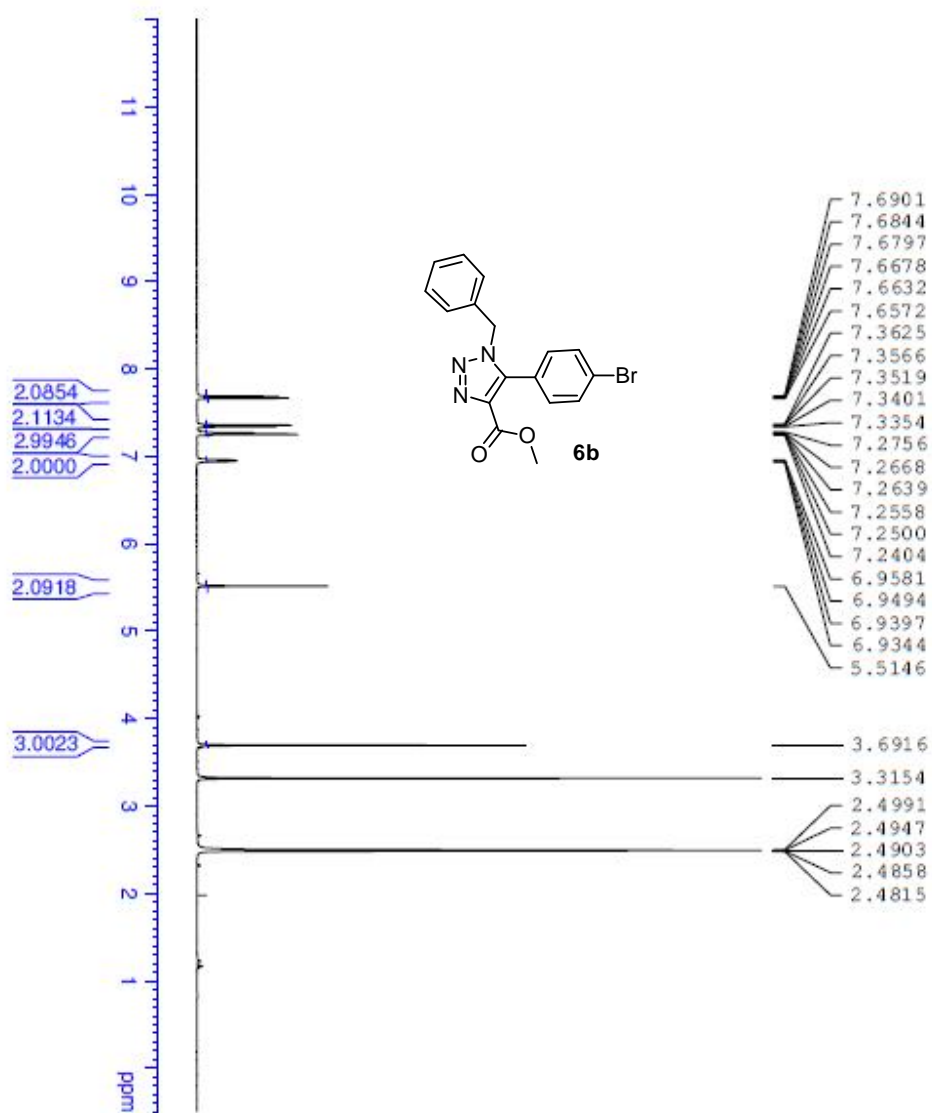

<sup>1</sup>H NMR (400 MHz) in DMSO-*d*<sub>6</sub> (**6b**)

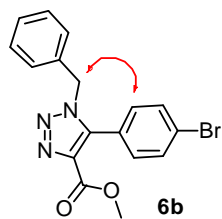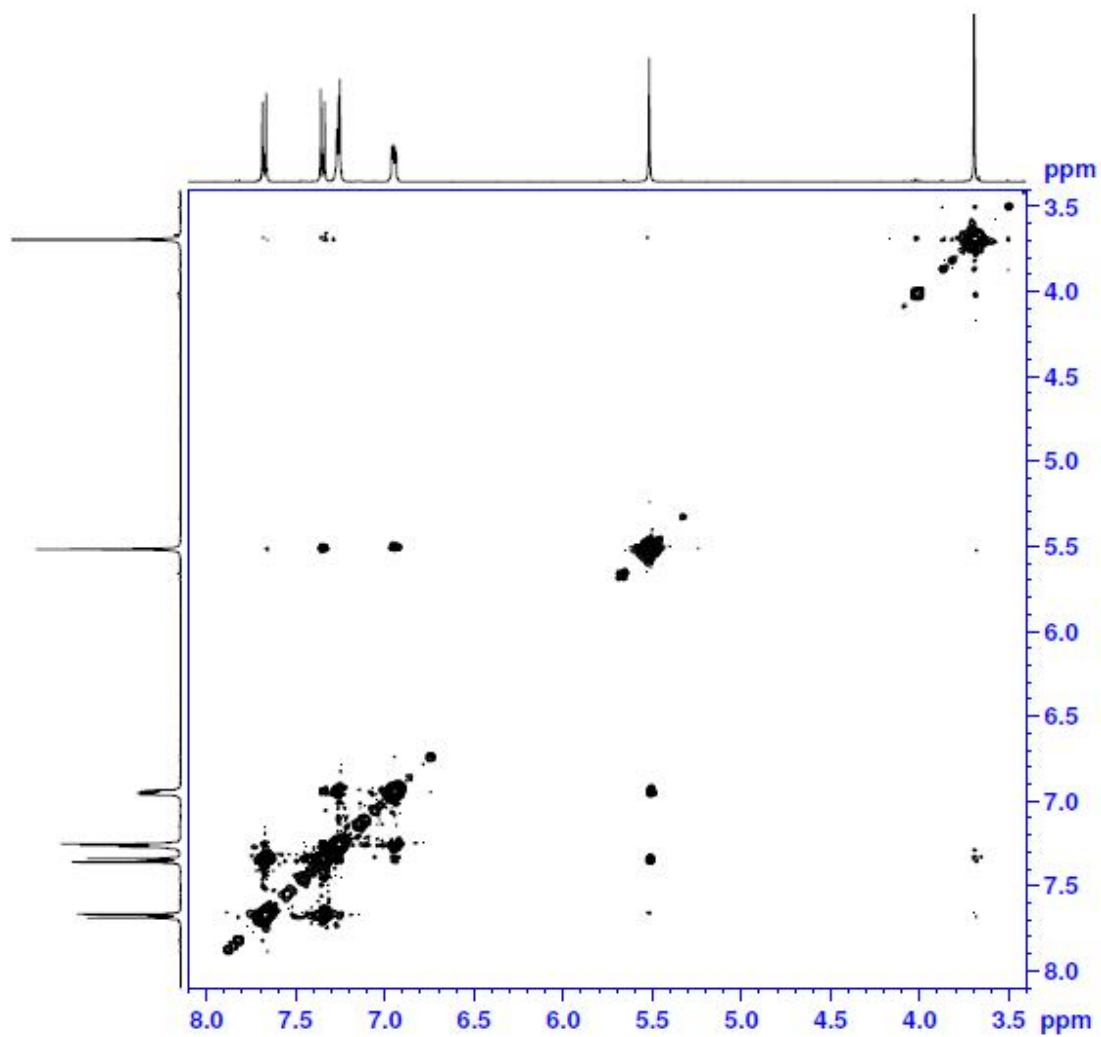

NOESY correlation (**6b**)

Method info : A: 0.1% TFA IN H2O , B:0.1% TFA IN ACN ; Flow Rate:2.0 ml/min  
 COLUMN:XBridge C8 (50x4.6mm, 3.5μ), +ve mode

| TIME | %B  |
|------|-----|
| 0    | 05  |
| 8.0  | 100 |
| 8.1  | 100 |
| 8.5  | 05  |
| 10.0 | 05  |

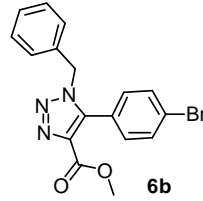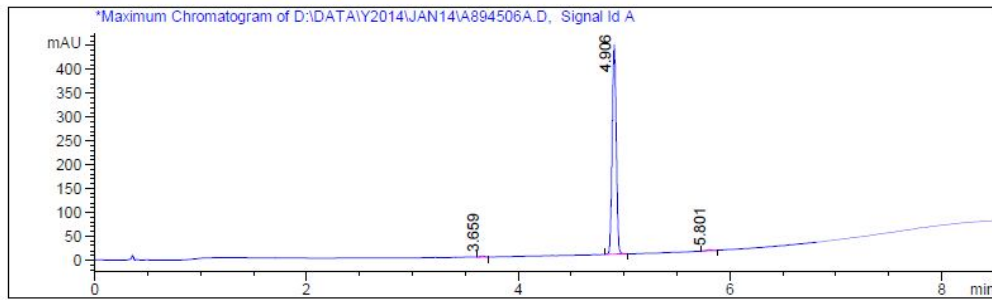

| Peak No | RT (min) | Area        | Area % |
|---------|----------|-------------|--------|
| 1       | 3.659    | 17.276e+000 | 0.614  |
| 2       | 4.906    | 1.170e+003  | 98.765 |
| 3       | 5.801    | 17.358e+000 | 0.621  |

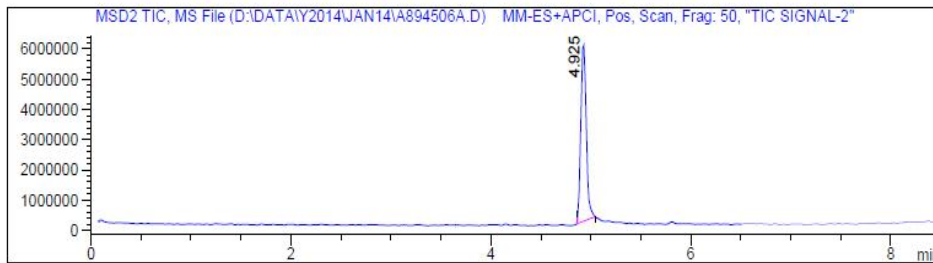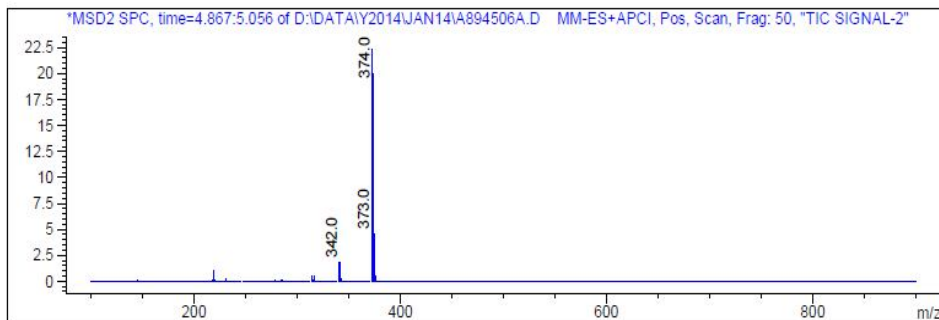

LC MS (6b)

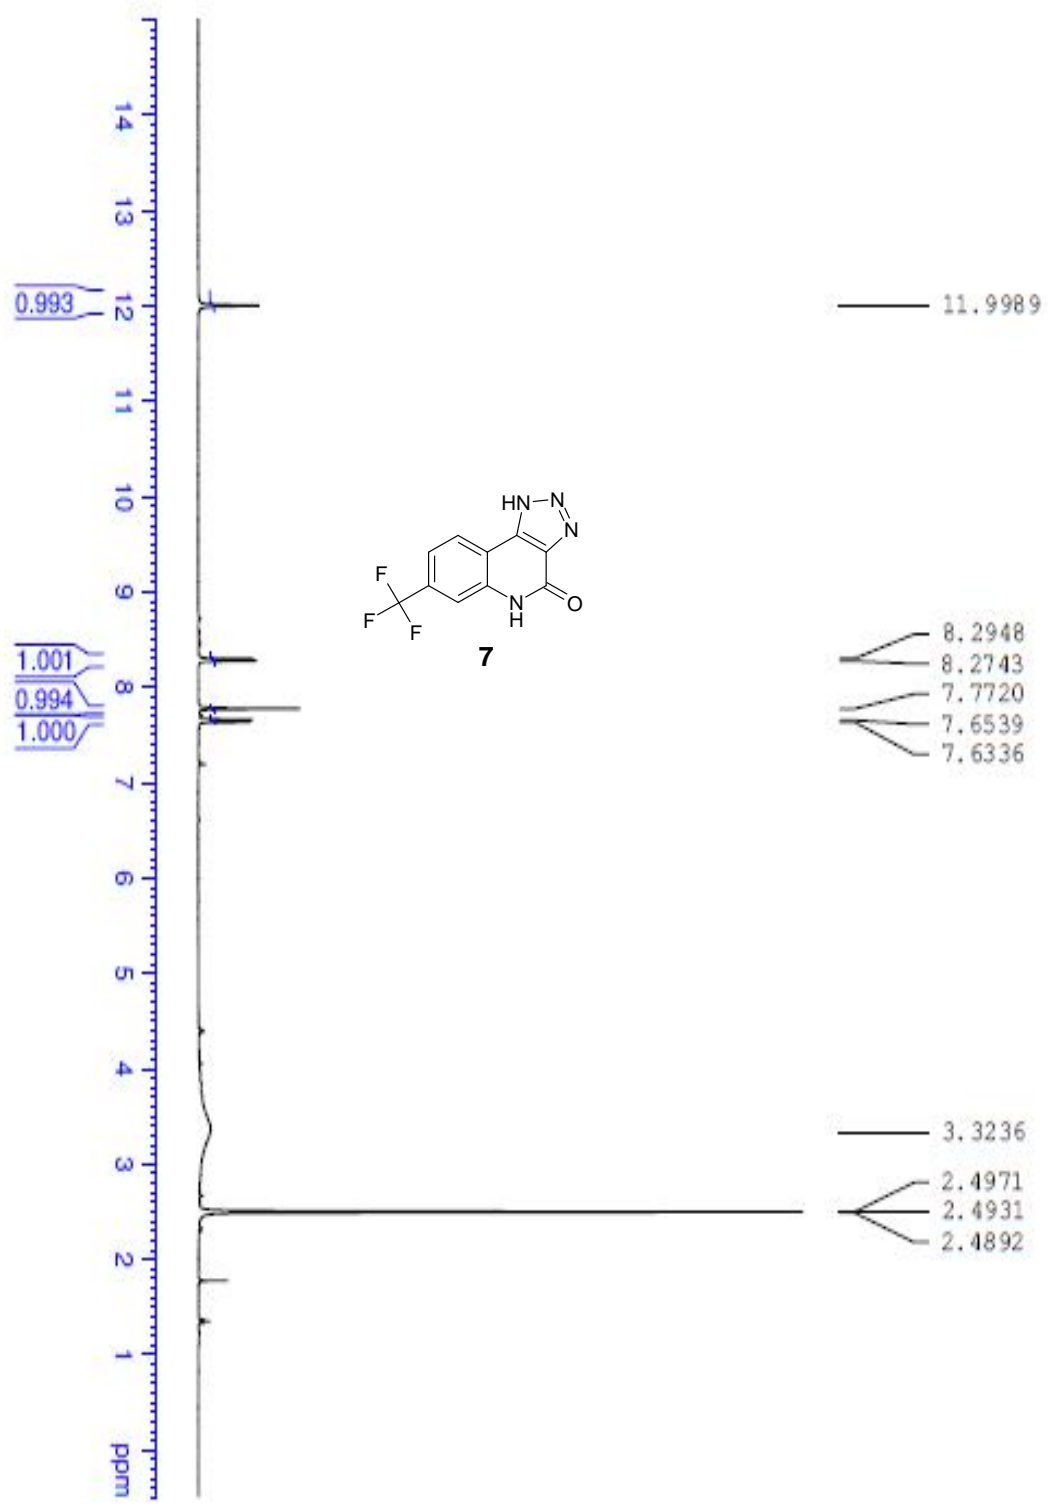

<sup>1</sup>H NMR (400 MHz) in DMSO-*d*<sub>6</sub> (**7**)



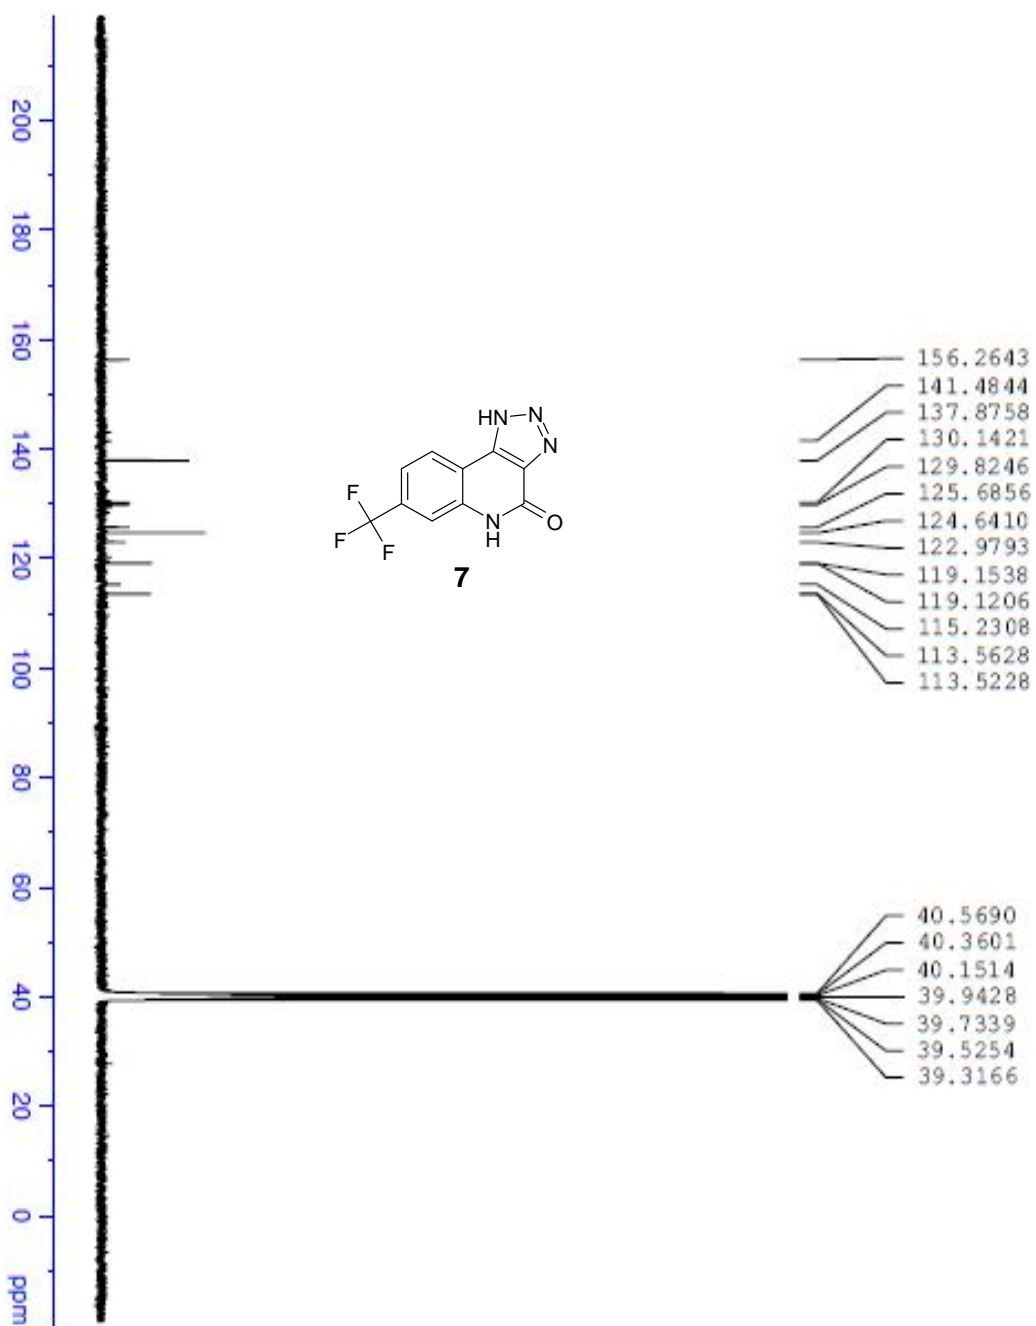

$^{13}\text{C}$  NMR (100 MHz) in  $\text{DMSO-d}_6$  (**7**)

Method info : A:0.1%TFA in H2O, B:0.1%TFA in ACN, Flow Rate:2.0ml/min  
 COLUMN: XBridge C8 (50X4.6)mm,3.5µm

| Time | % of B |
|------|--------|
| 0    | 5      |
| 8.0  | 100    |
| 8.1  | 100    |
| 8.5  | 5      |
| 10.0 | 5      |

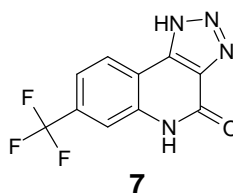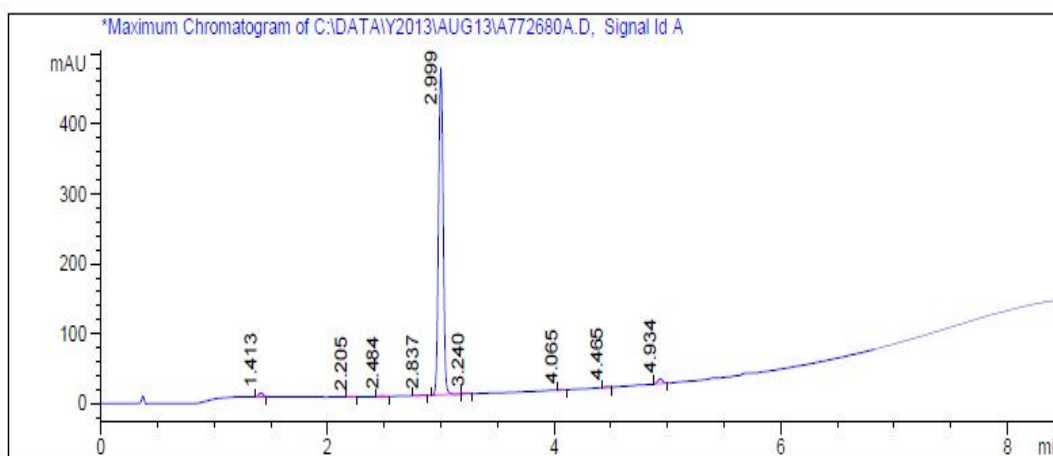

| Peak No | RT min | Area       | Area % |
|---------|--------|------------|--------|
| 11      | 1.413  | 1.451e+001 | 1.06   |
| 12      | 2.205  | 2.060e+000 | 0.15   |
| 13      | 2.484  | 3.556e+000 | 0.26   |
| 14      | 2.837  | 3.028e+000 | 0.22   |
| 15      | 2.999  | 1.317e+003 | 96.00  |
| 16      | 3.240  | 1.803e+000 | 0.13   |
| 17      | 4.065  | 2.940e+000 | 0.21   |
| 18      | 4.465  | 3.522e+000 | 0.26   |
| 19      | 4.934  | 2.350e+001 | 1.71   |

HPLC (7)

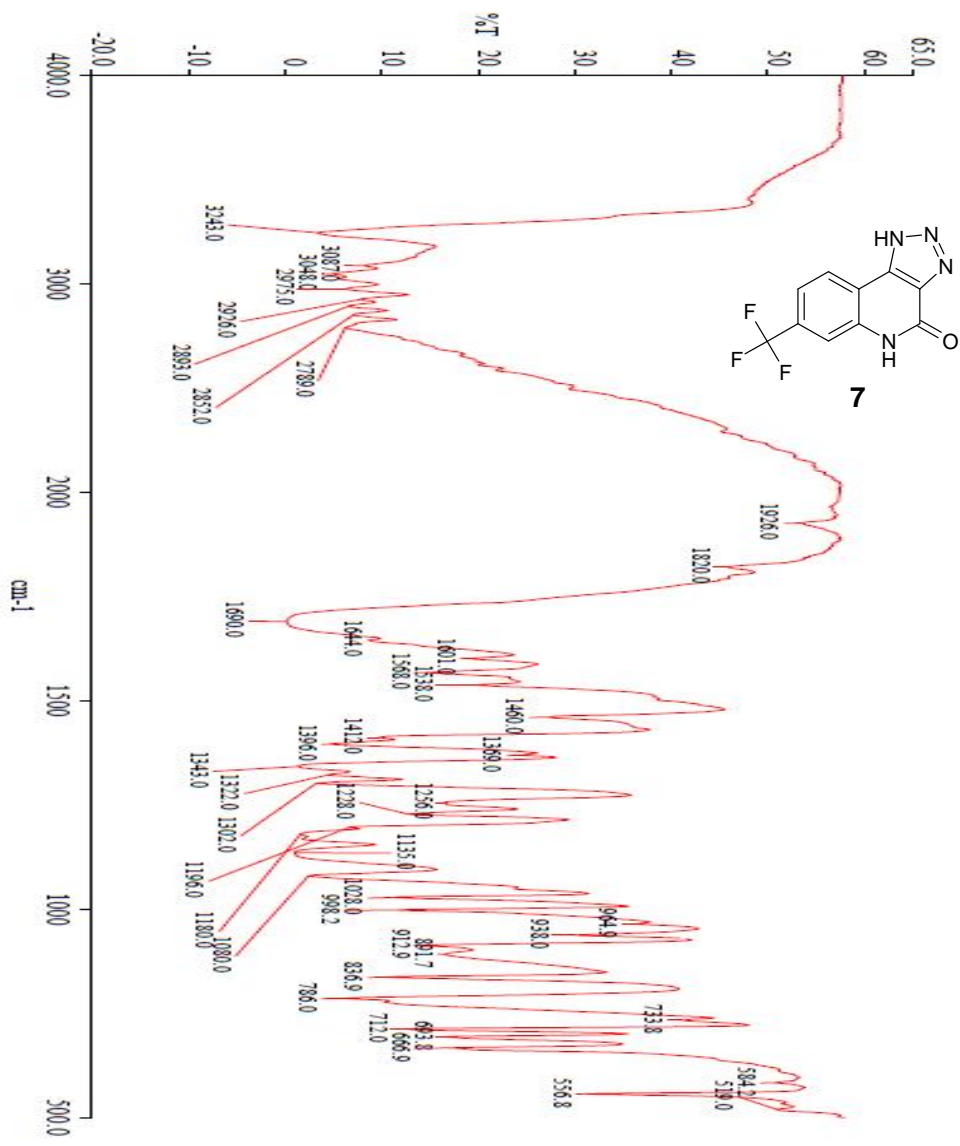

IR (7)

\*\*\*\*\*
